# Supplementary material
Source: PubMed Central journal article supplement (PMC6688953)

**Paw Statistics - RF - Stand (s)**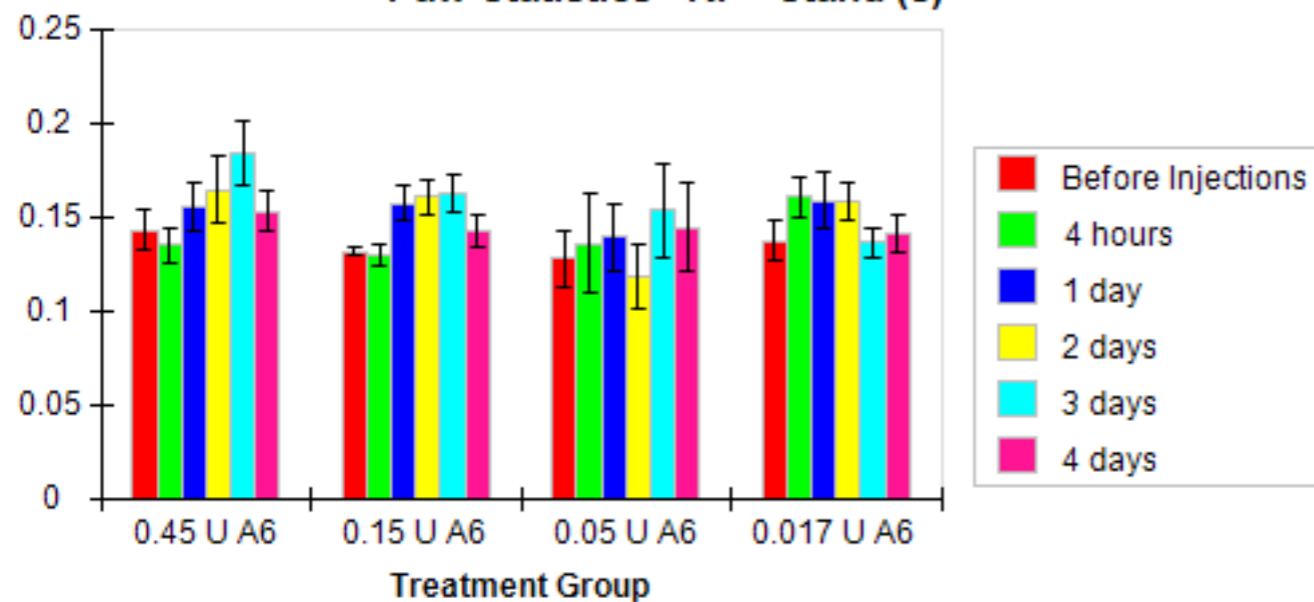**Paw Statistics - RH - Stand (s)**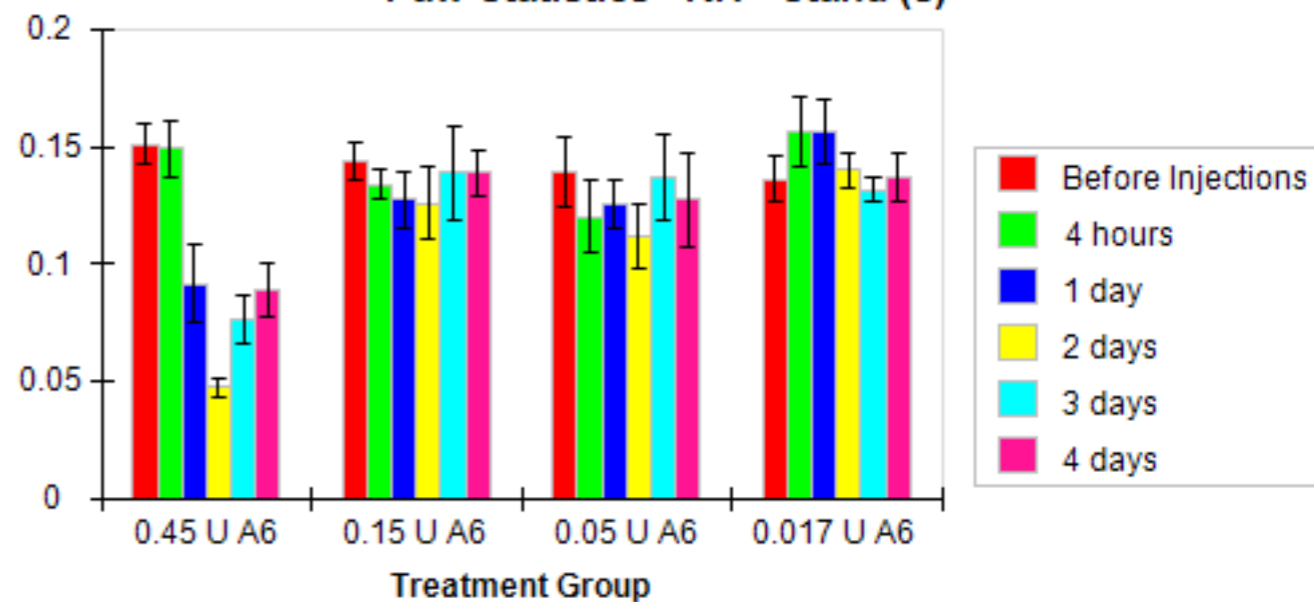**Paw Statistics - LF - Stand (s)**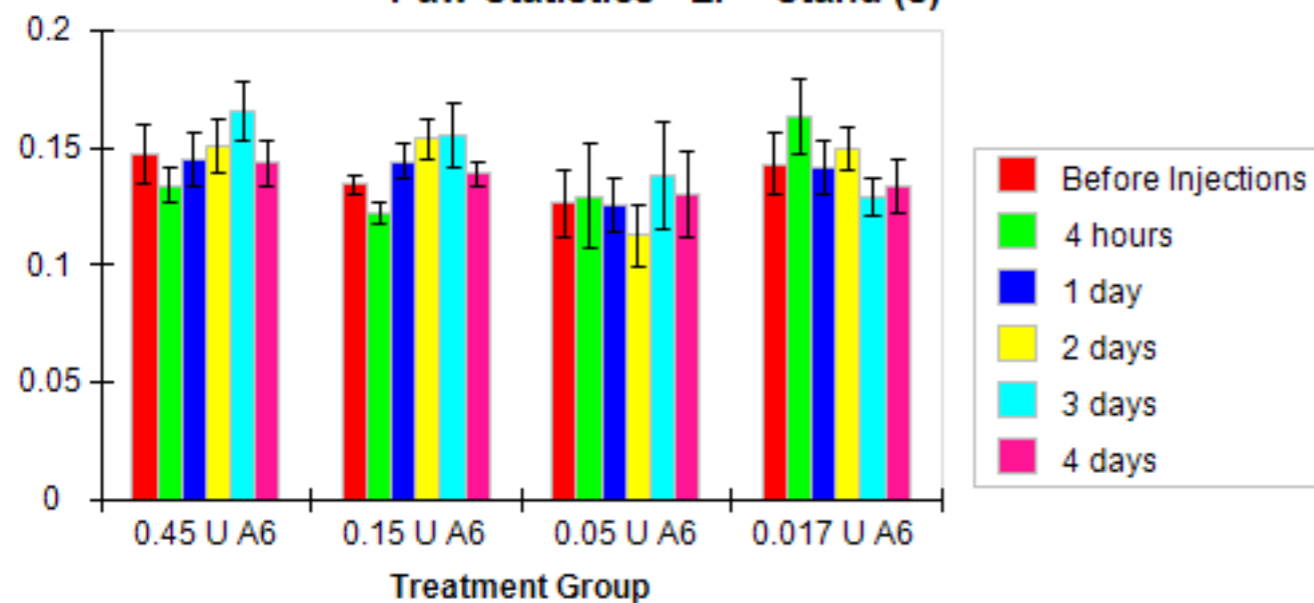**Paw Statistics - LH - Stand (s)**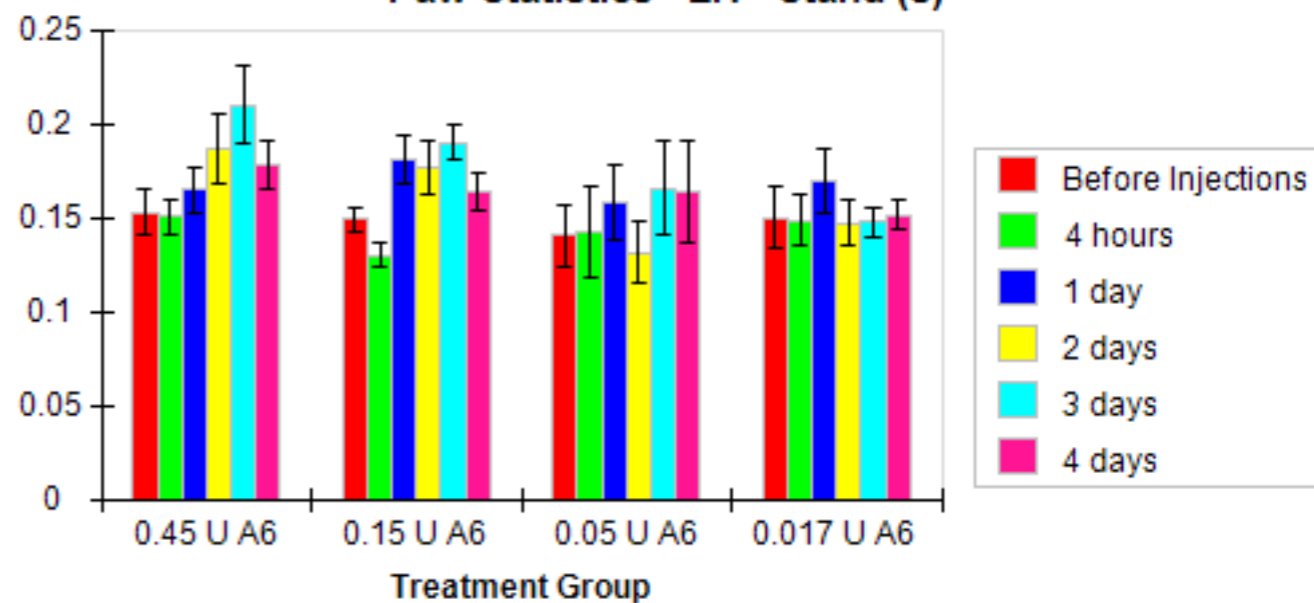

**Paw Statistics - RF - Stand Index**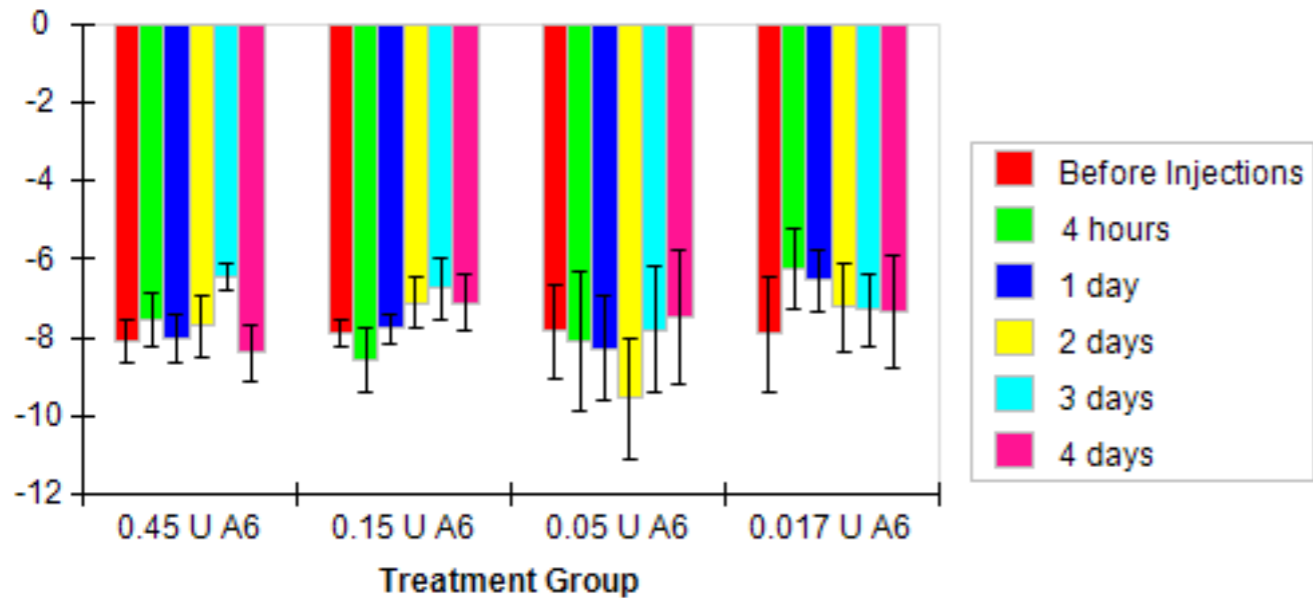**Paw Statistics - RH - Stand Index**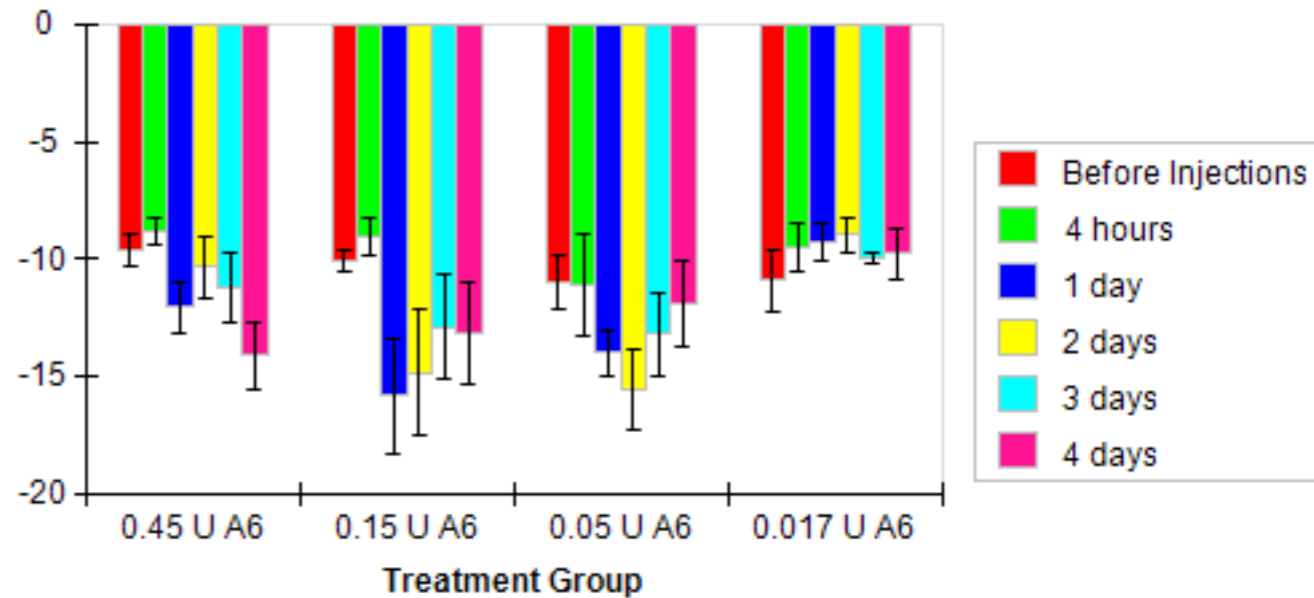**Paw Statistics - LF - Stand Index**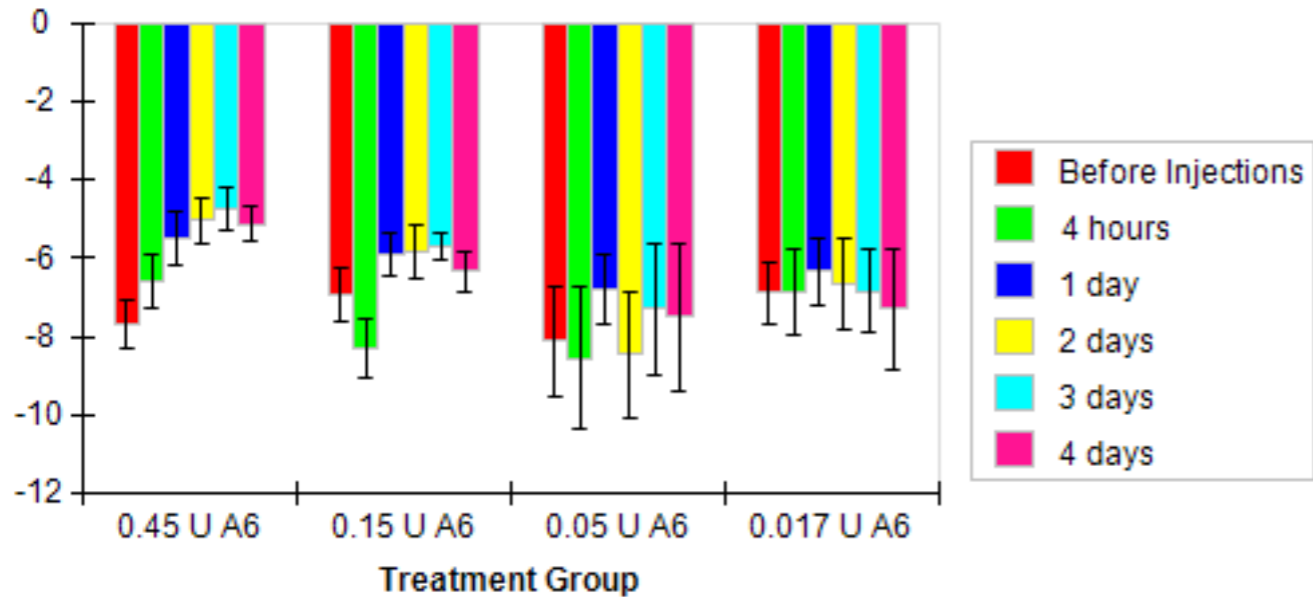**Paw Statistics - LH - Stand Index**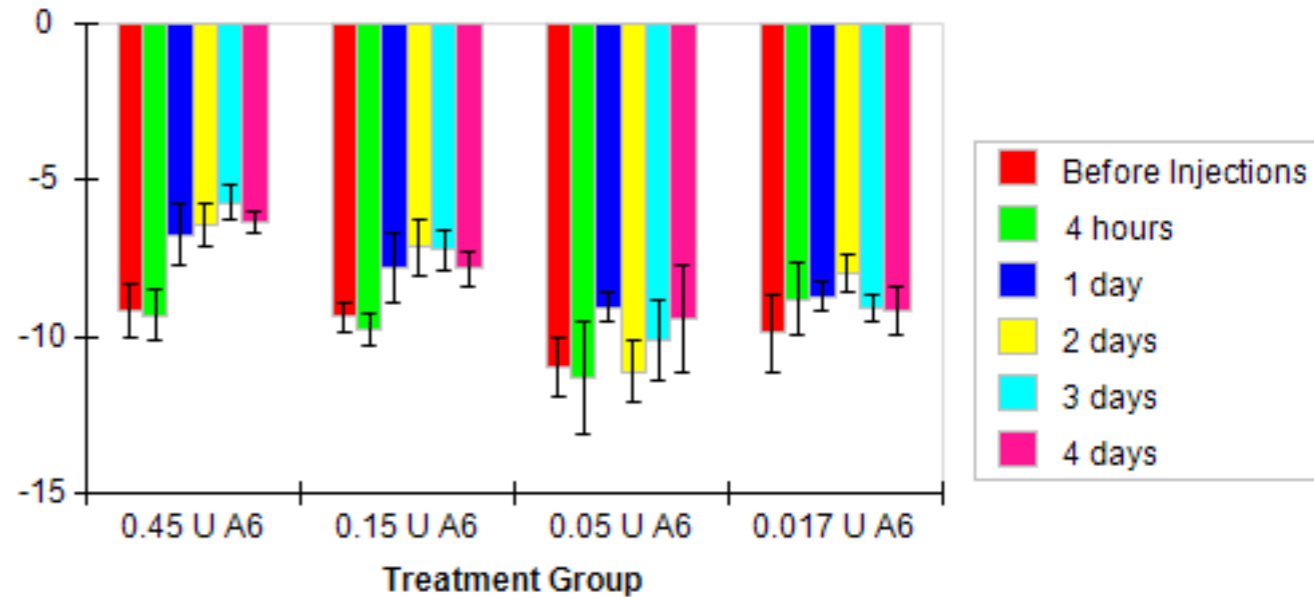

**Paw Statistics - RF - Max Contact At (%)**

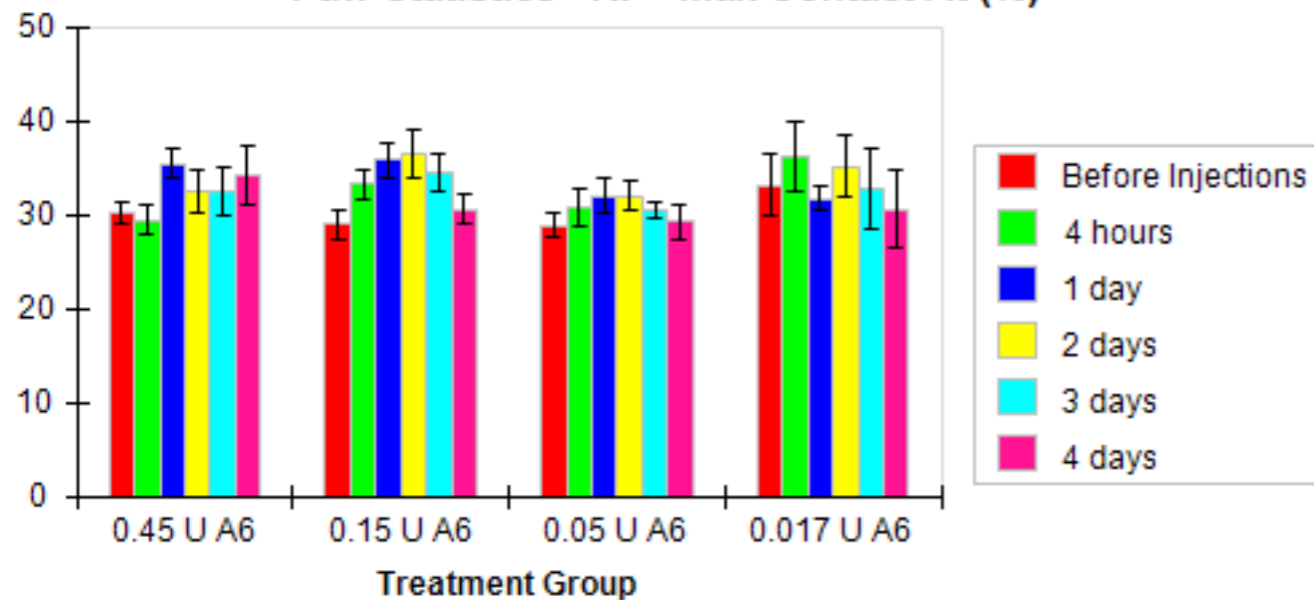

**Paw Statistics - RH - Max Contact At (%)**

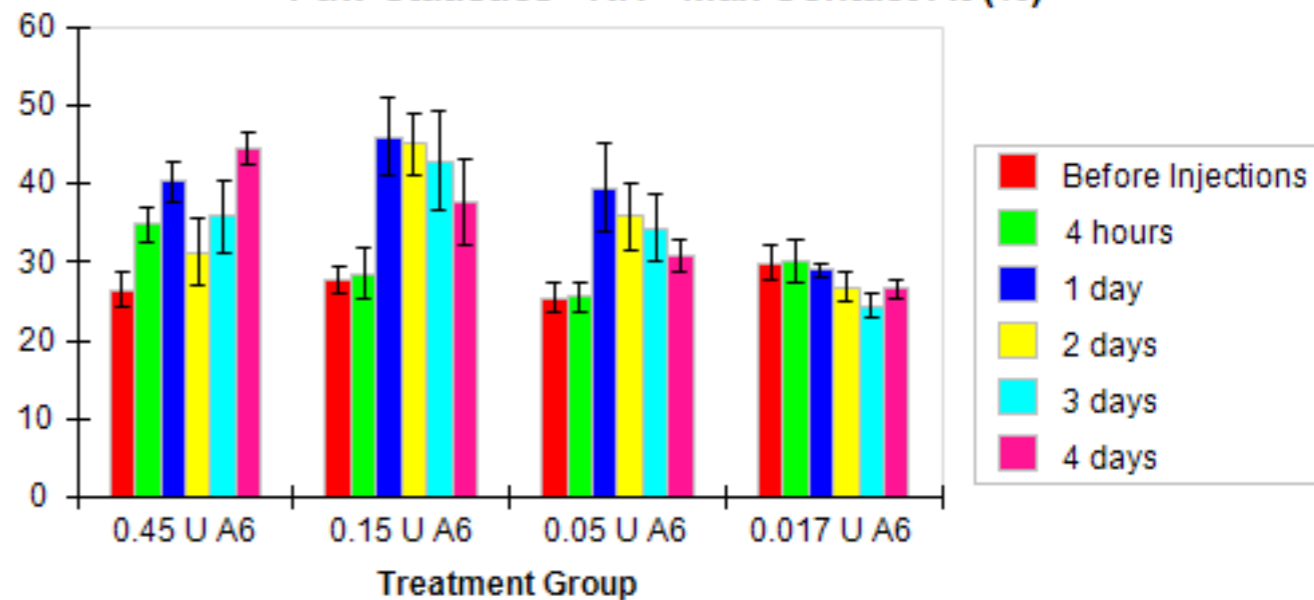

**Paw Statistics - LF - Max Contact At (%)**

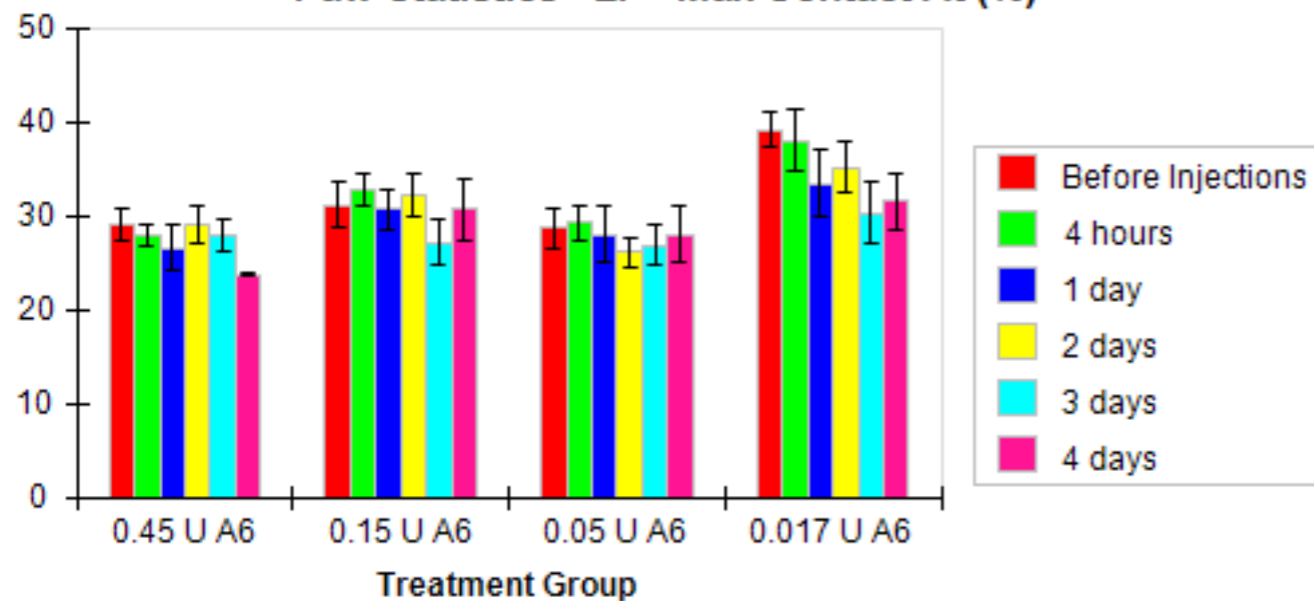

**Paw Statistics - LH - Max Contact At (%)**

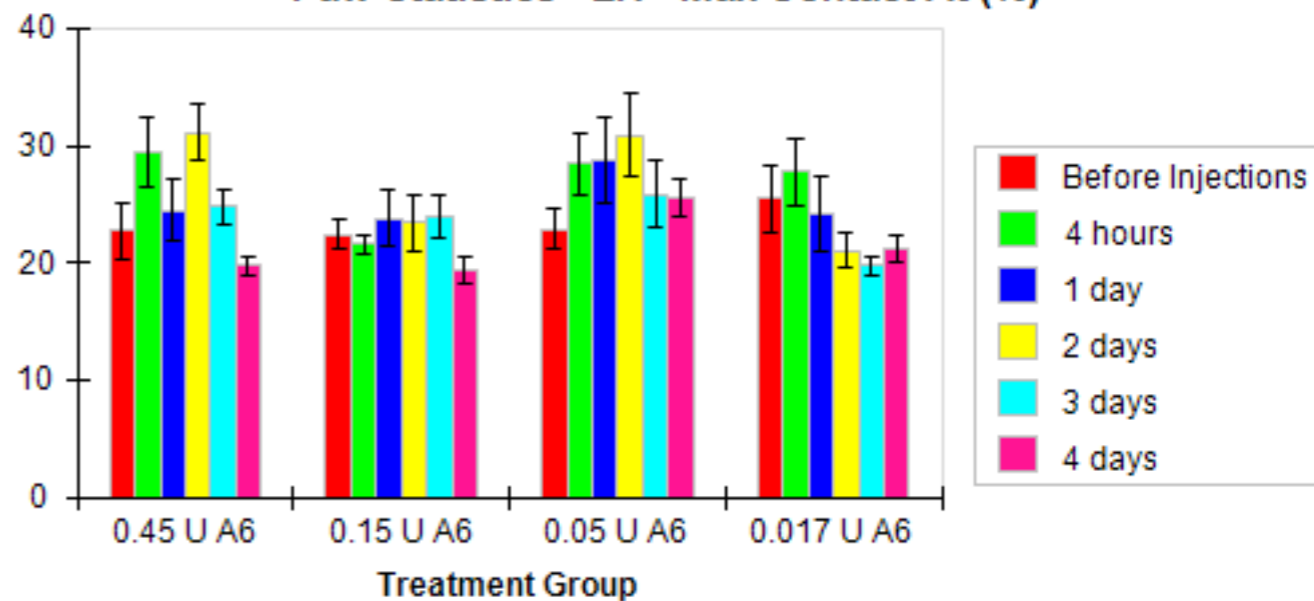

**Paw Statistics - RF - Max Contact Area (cm<sup>2</sup>)**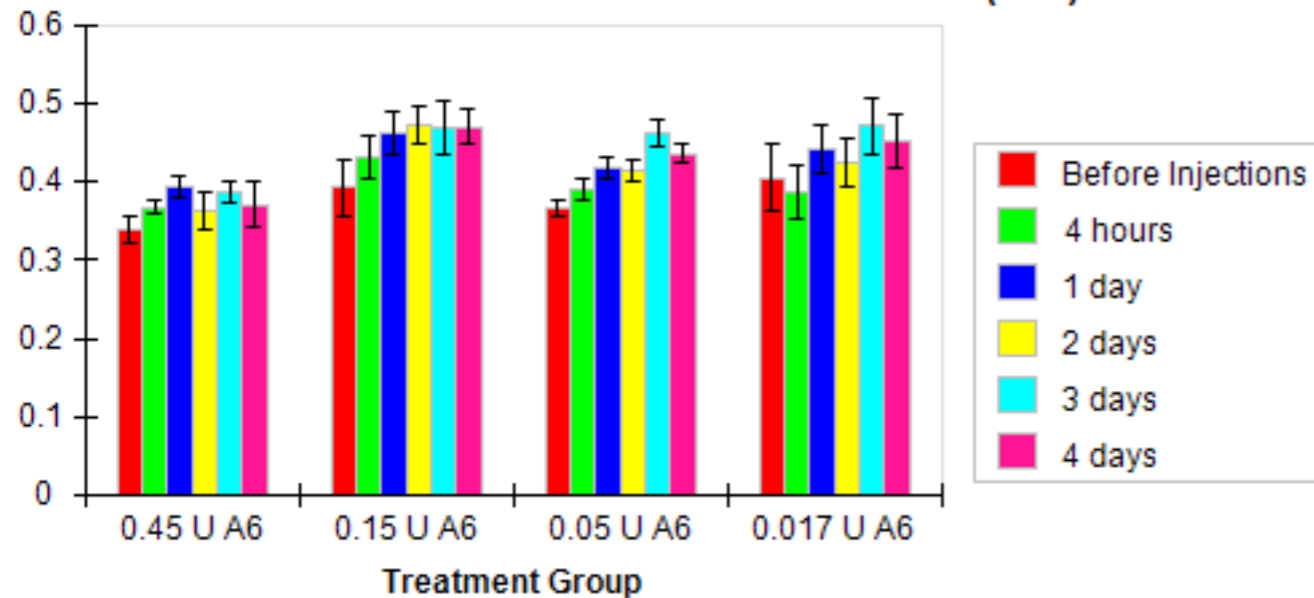**Paw Statistics - RH - Max Contact Area (cm<sup>2</sup>)**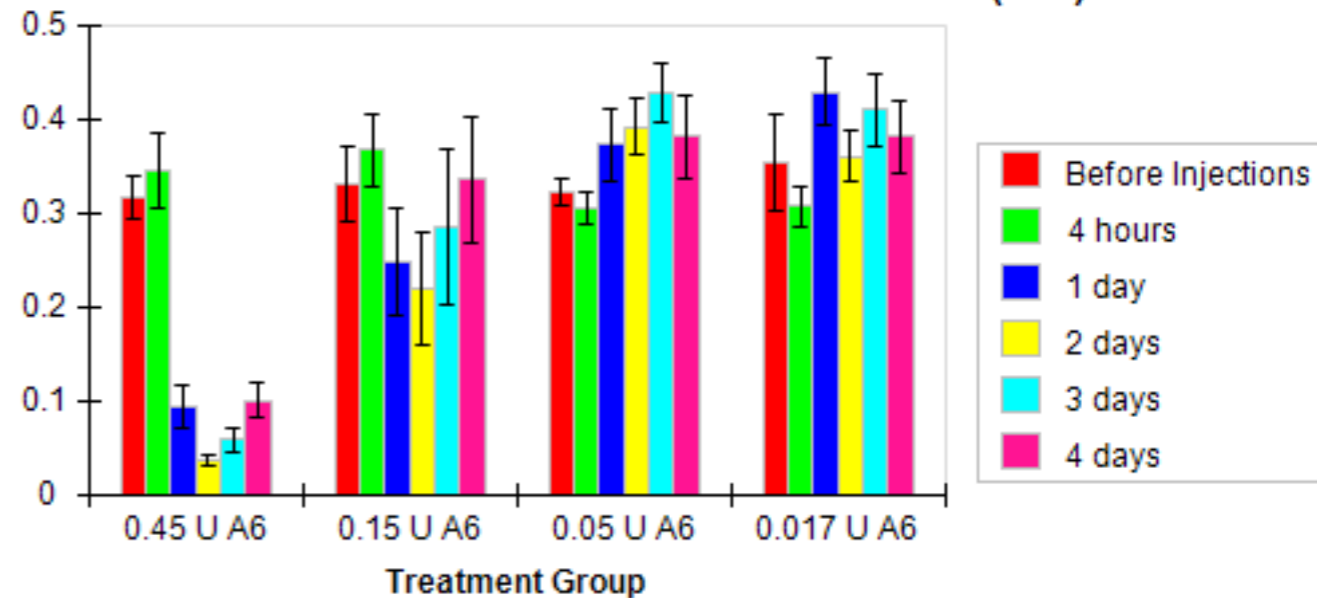**Paw Statistics - LF - Max Contact Area (cm<sup>2</sup>)**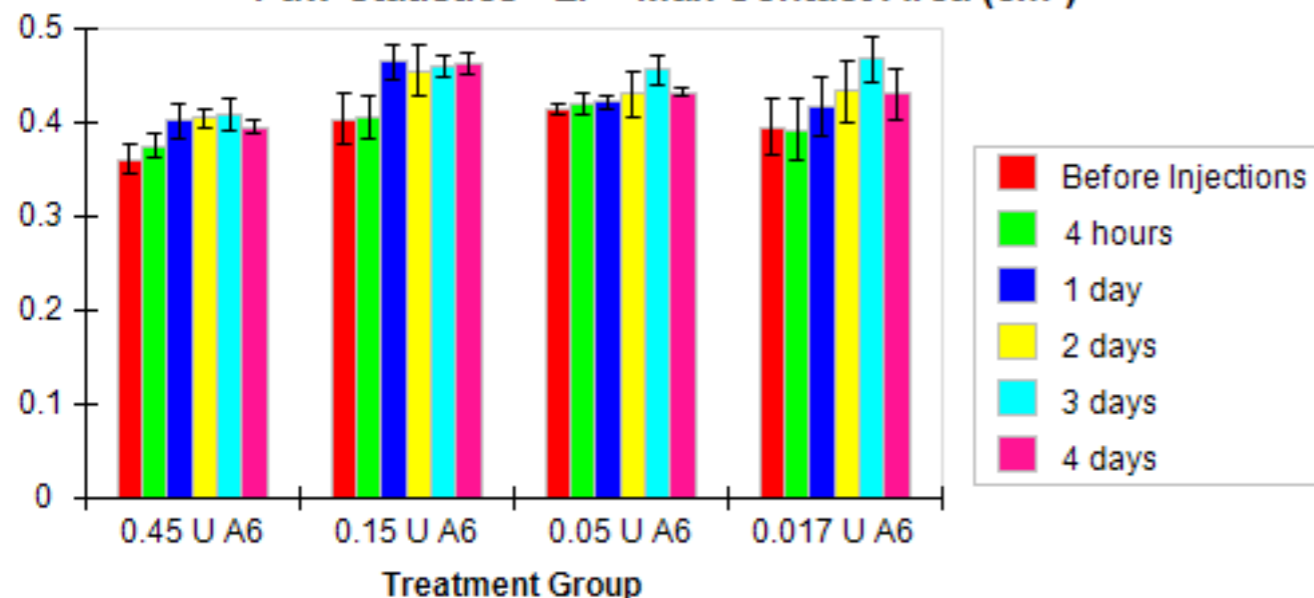**Paw Statistics - LH - Max Contact Area (cm<sup>2</sup>)**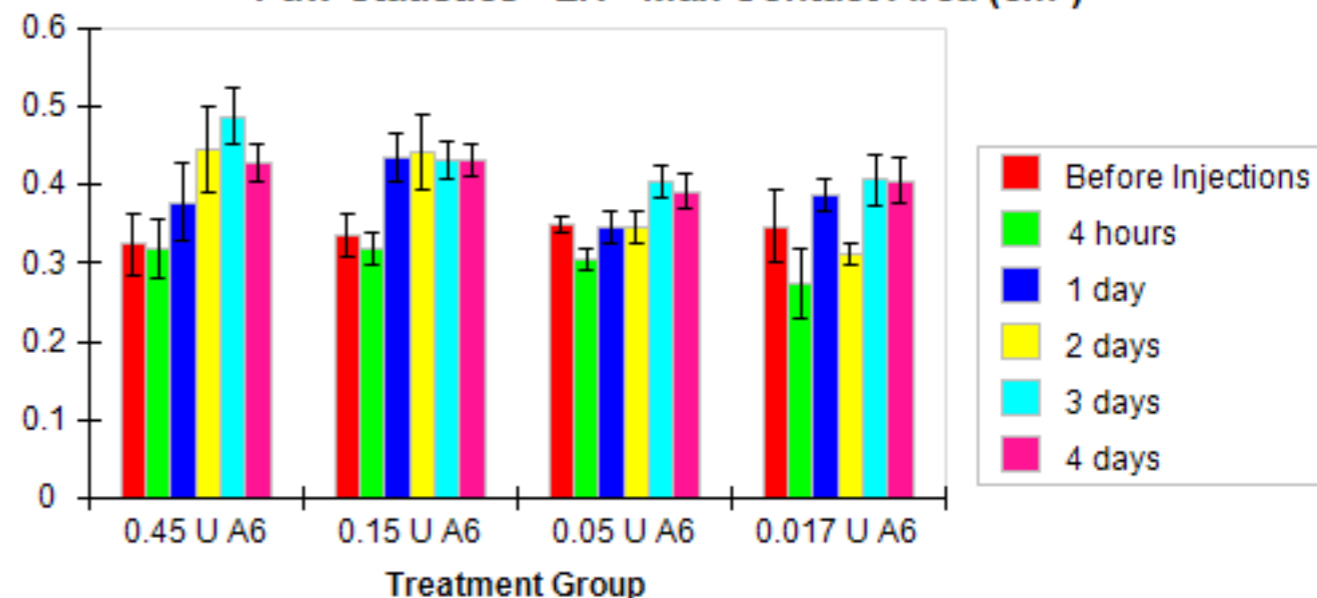

**Paw Statistics - RF - Max Contact Max Intensity**

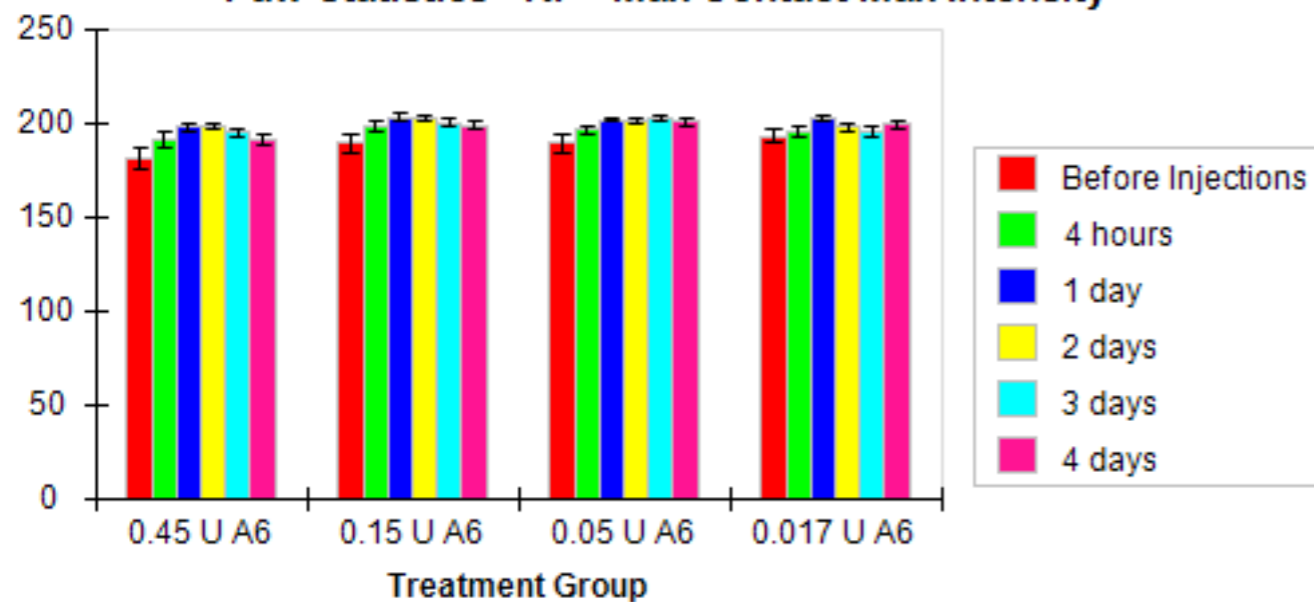

**Paw Statistics - RH - Max Contact Max Intensity**

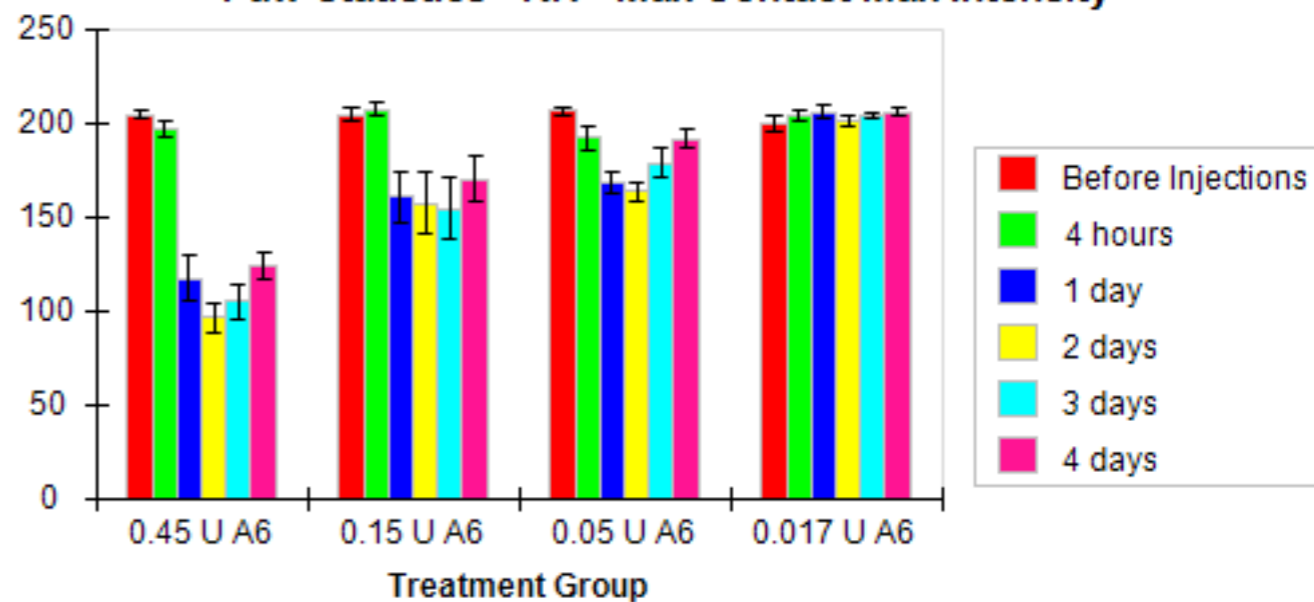

**Paw Statistics - LF - Max Contact Max Intensity**

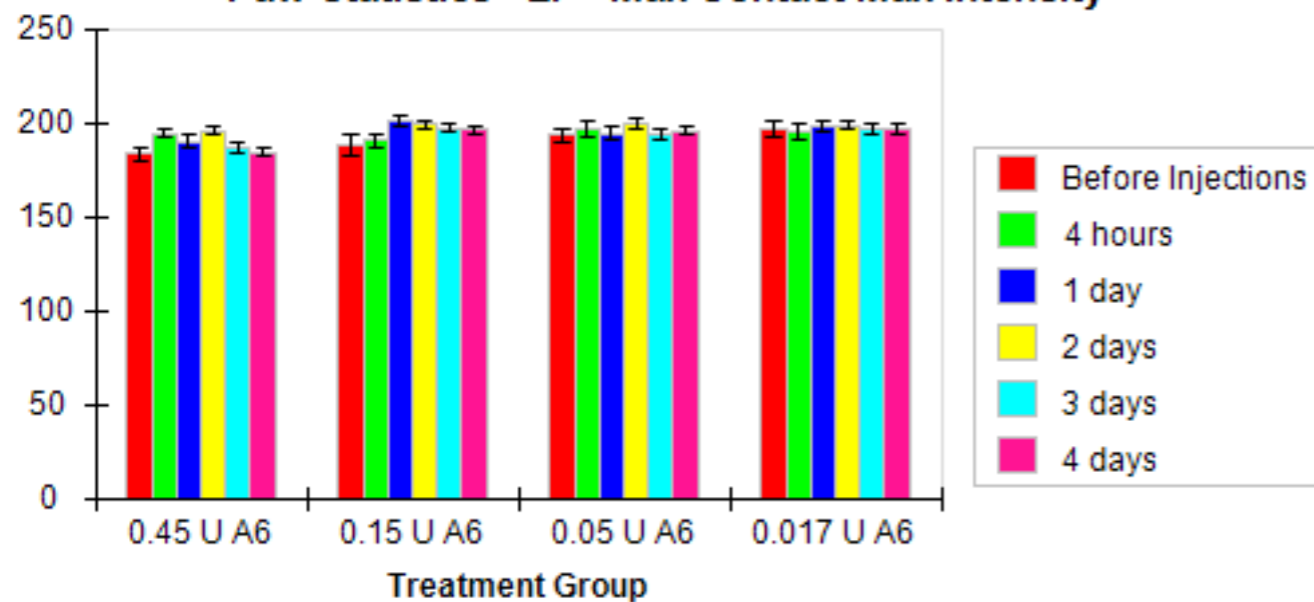

**Paw Statistics - LH - Max Contact Max Intensity**

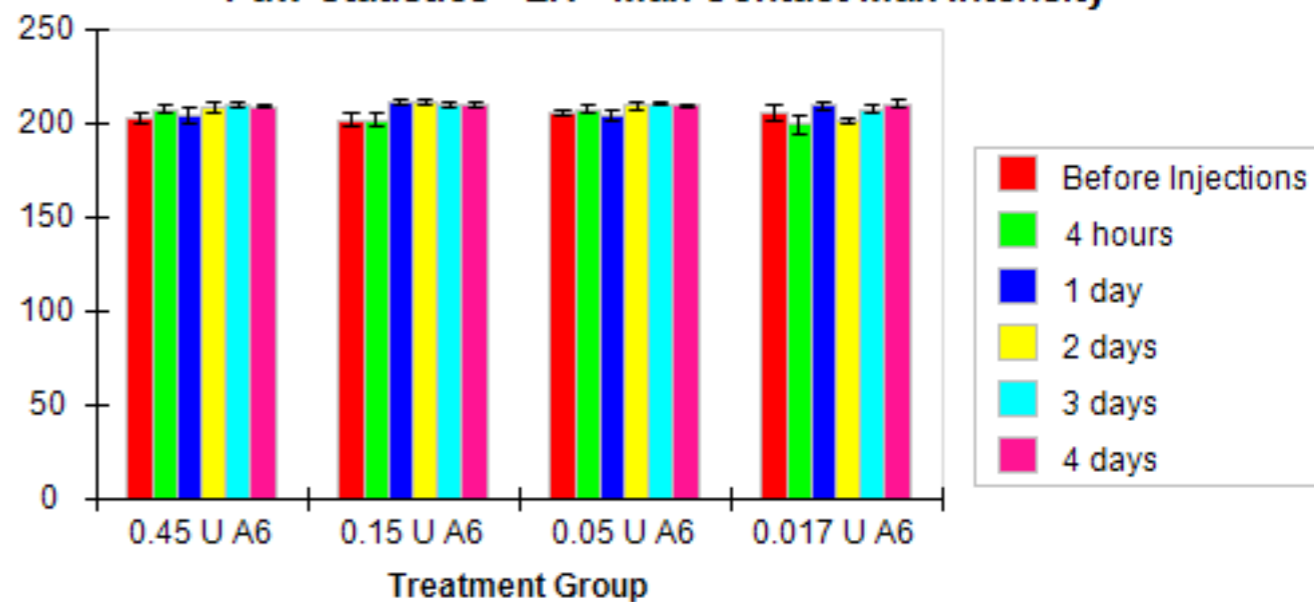

**Paw Statistics - RF - Max Contact Mean Intensity**

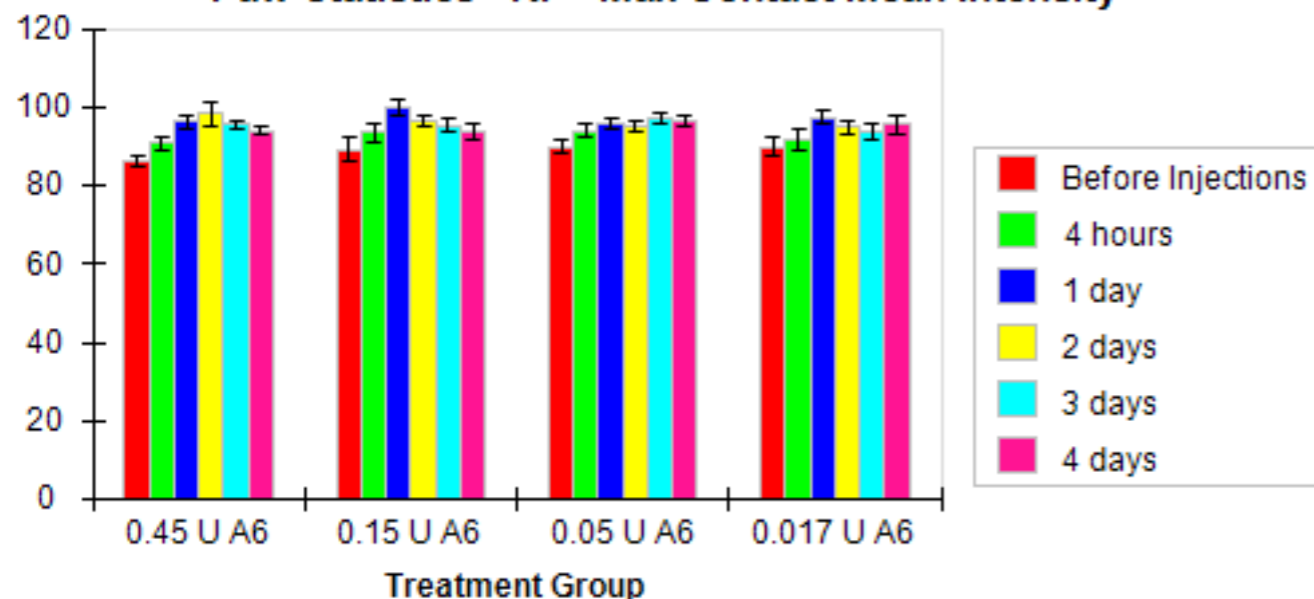

**Paw Statistics - RH - Max Contact Mean Intensity**

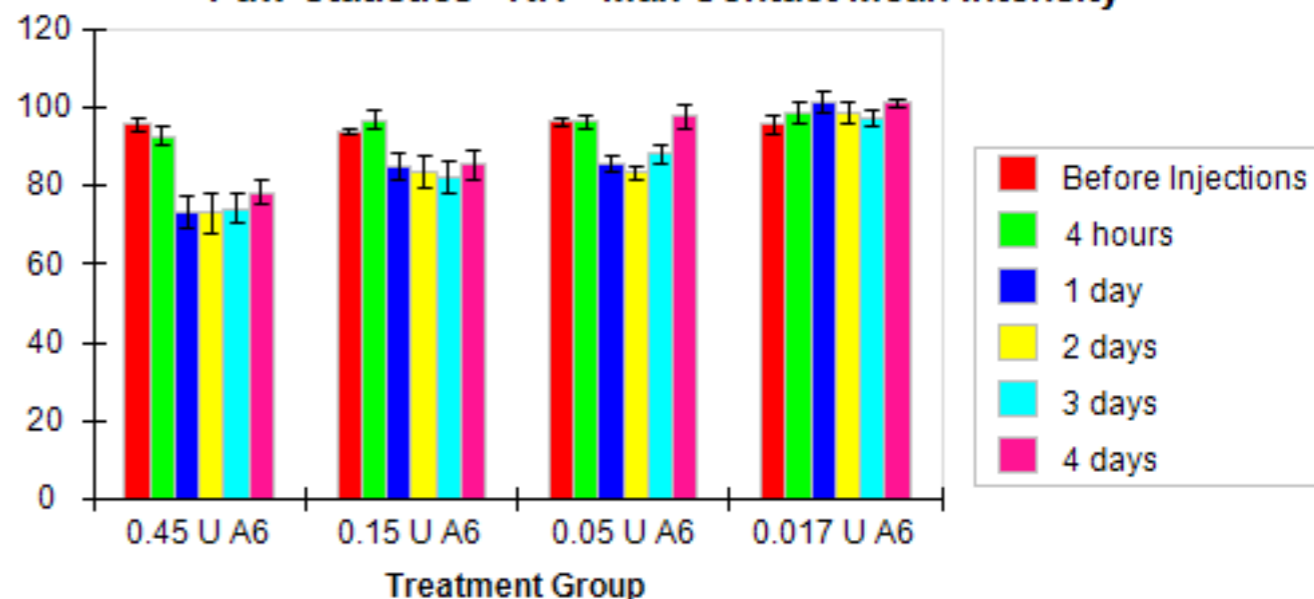

**Paw Statistics - LF - Max Contact Mean Intensity**

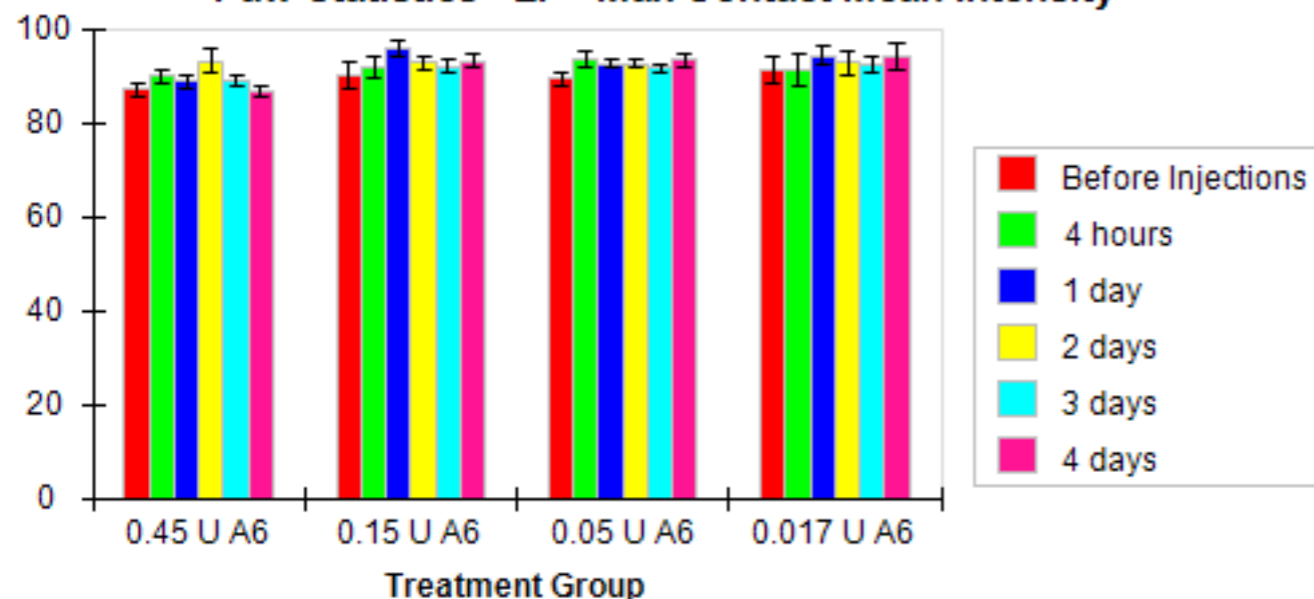

**Paw Statistics - LH - Max Contact Mean Intensity**

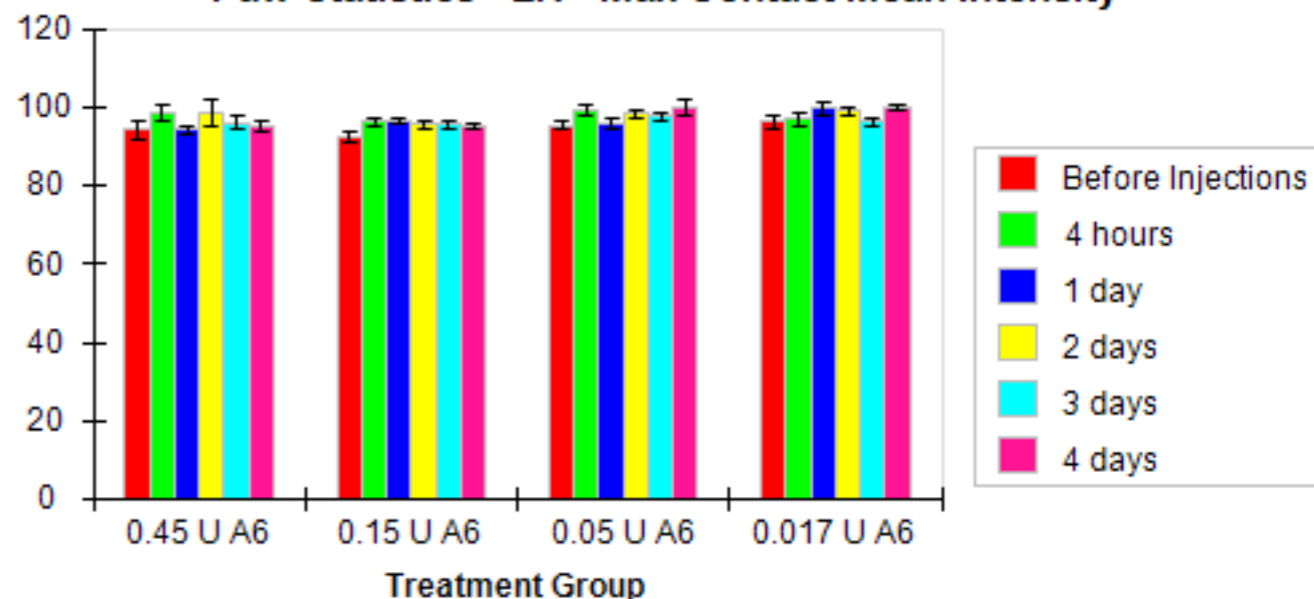

**Paw Statistics - RF - Print Length (cm)**

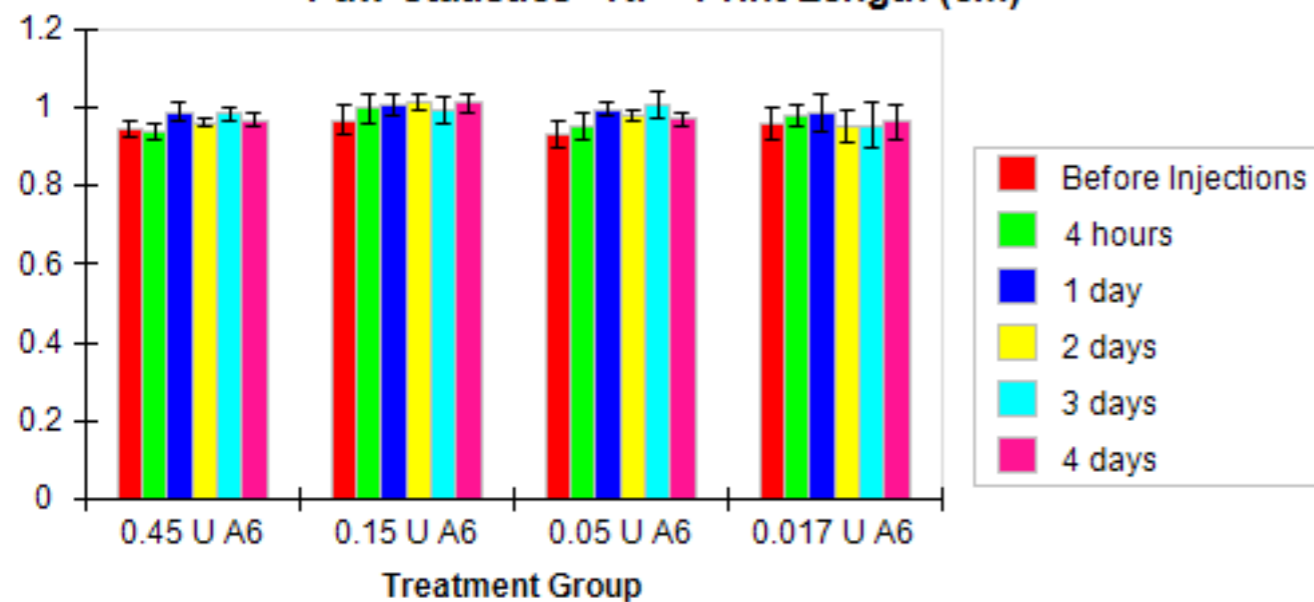

**Paw Statistics - RH - Print Length (cm)**

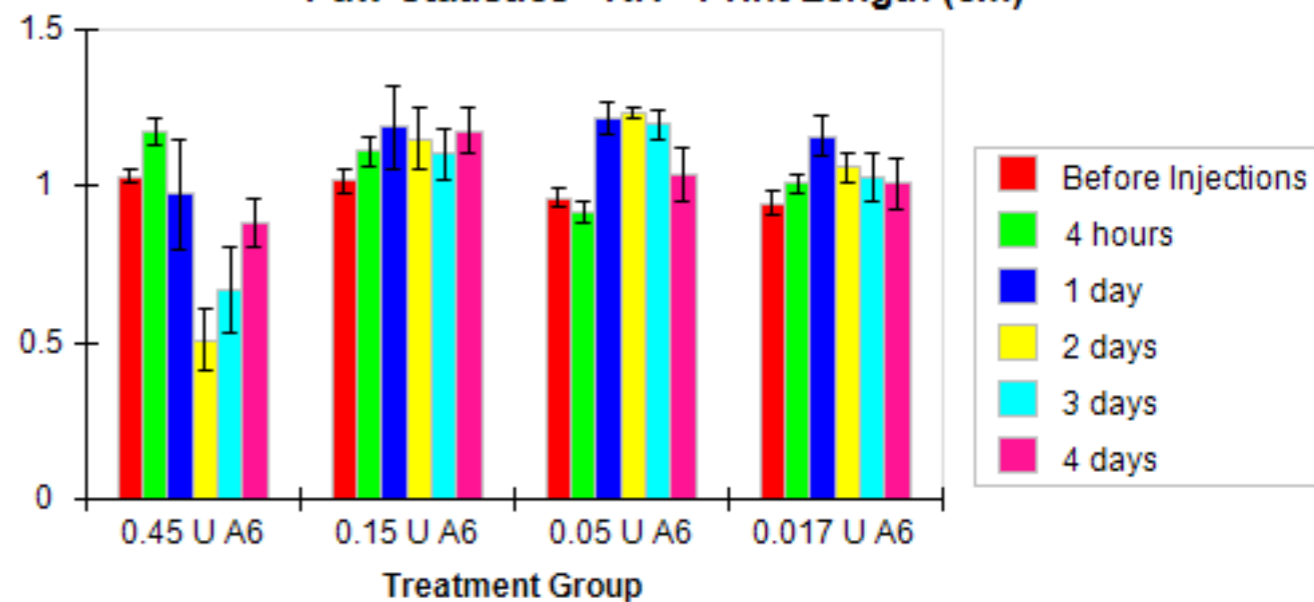

**Paw Statistics - LF - Print Length (cm)**

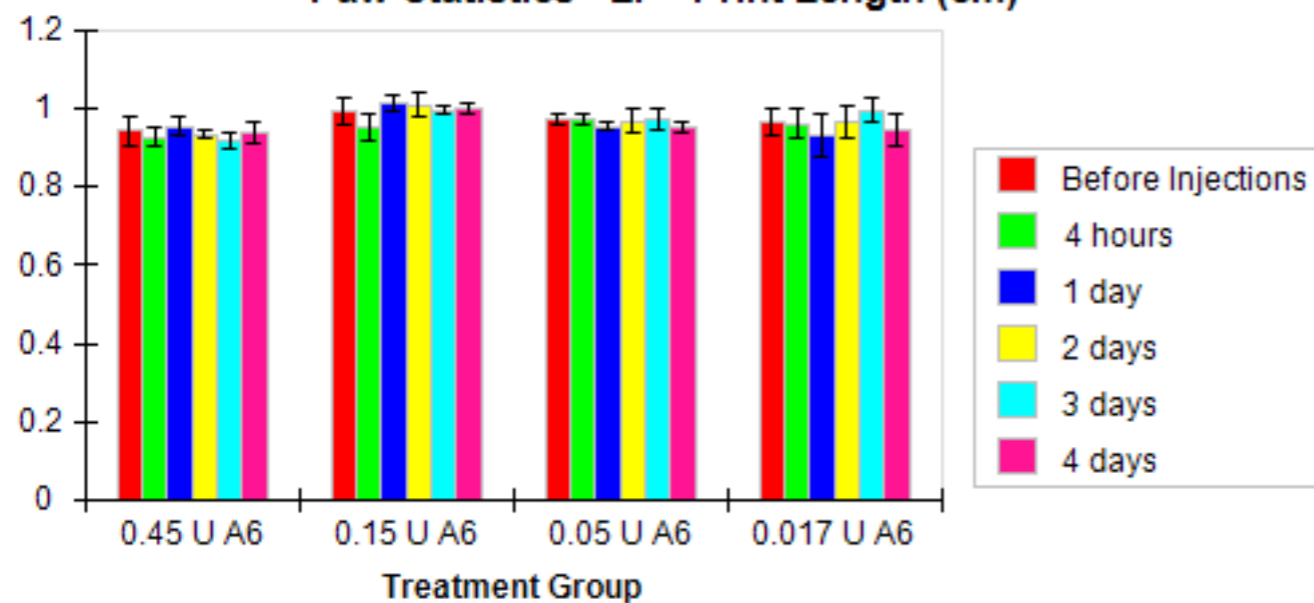

**Paw Statistics - LH - Print Length (cm)**

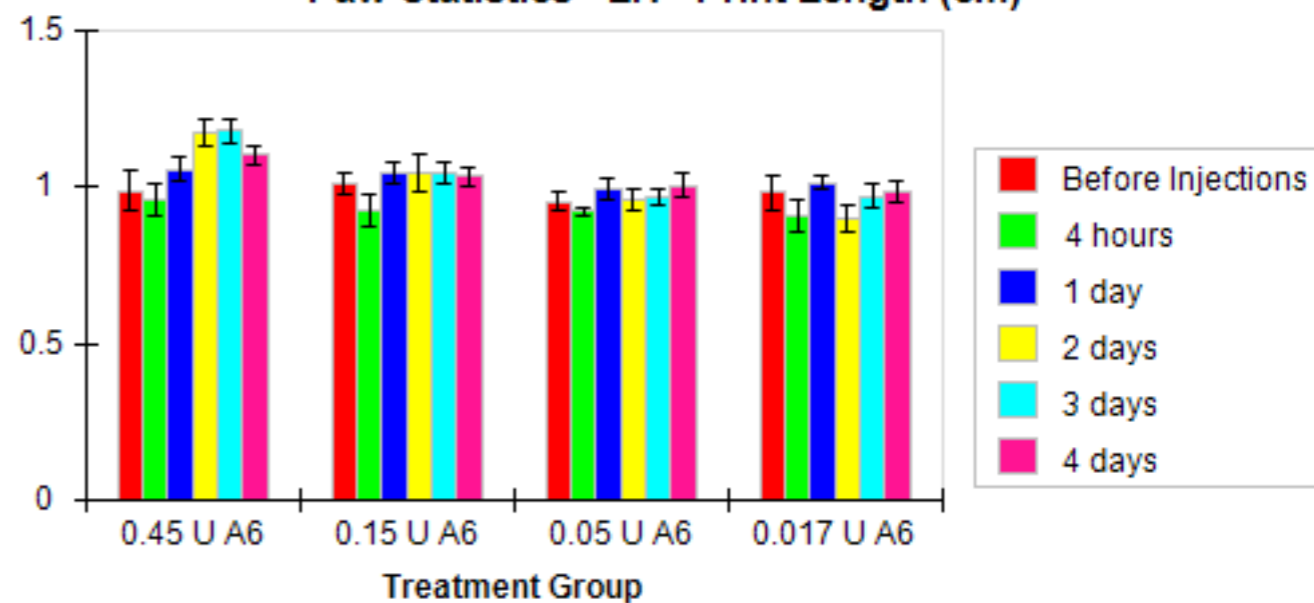

**Paw Statistics - RF - Print Width (cm)**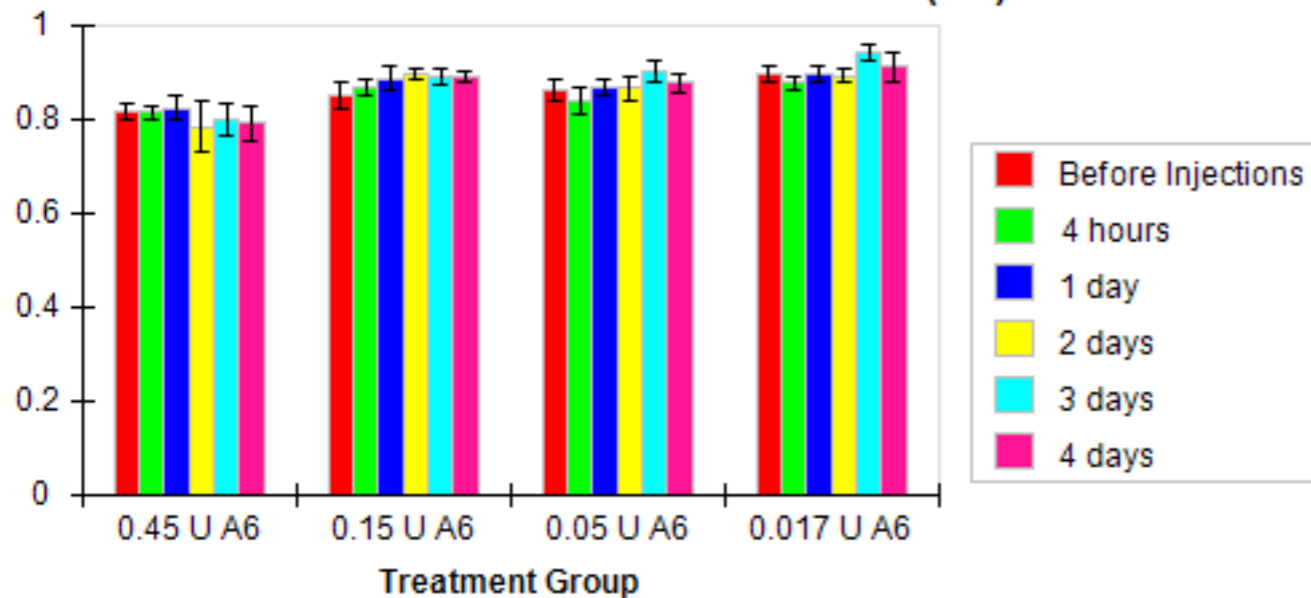**Paw Statistics - RH - Print Width (cm)**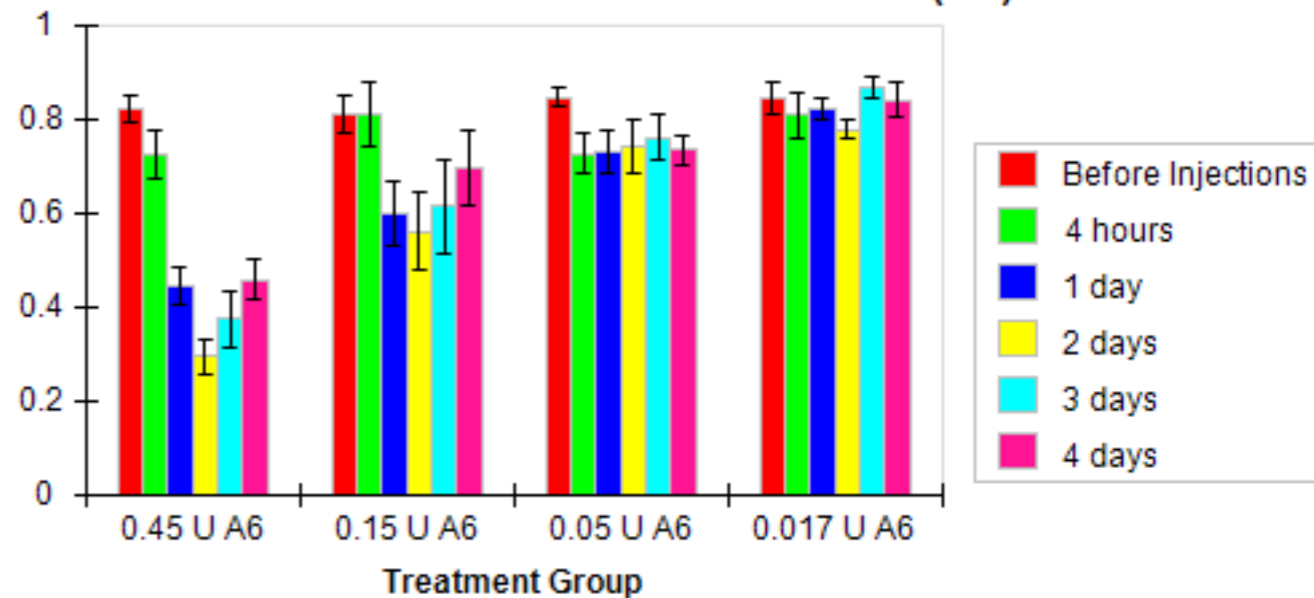**Paw Statistics - LF - Print Width (cm)**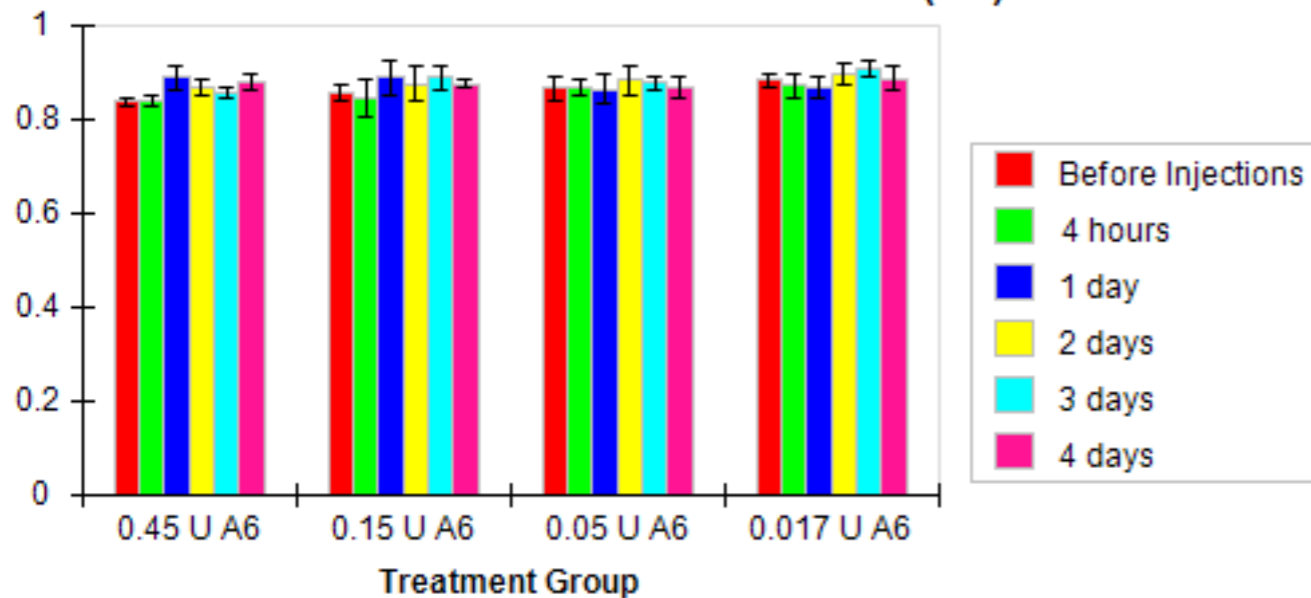**Paw Statistics - LH - Print Width (cm)**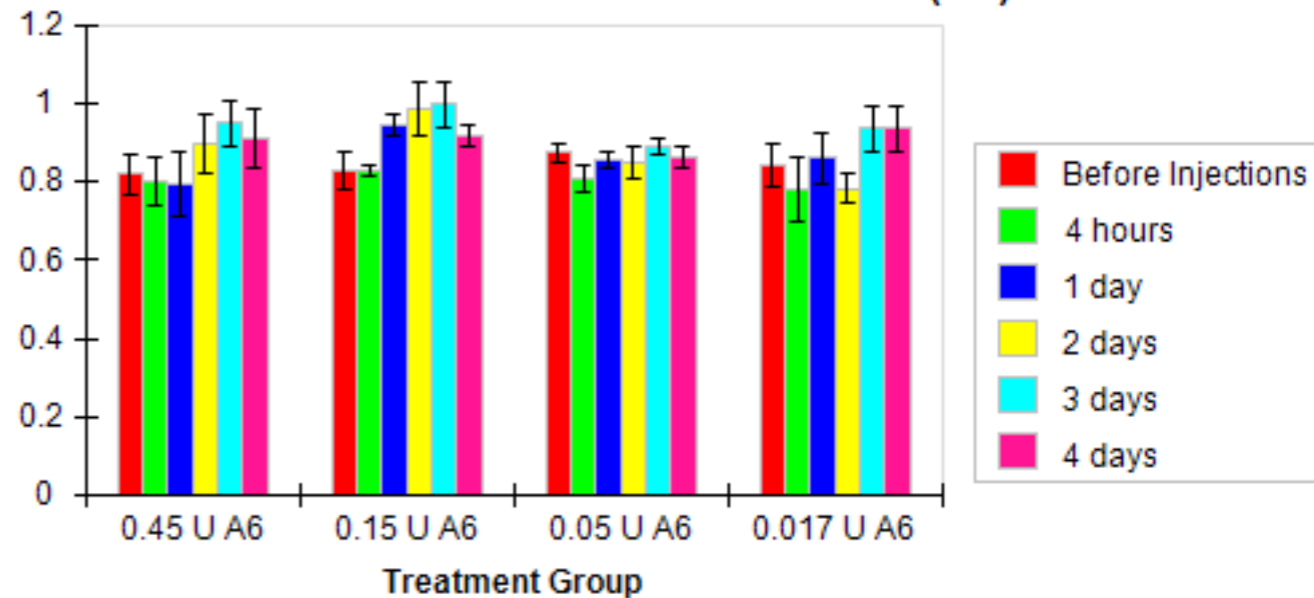



**Paw Statistics - RF - Print Area (cm<sup>2</sup>)**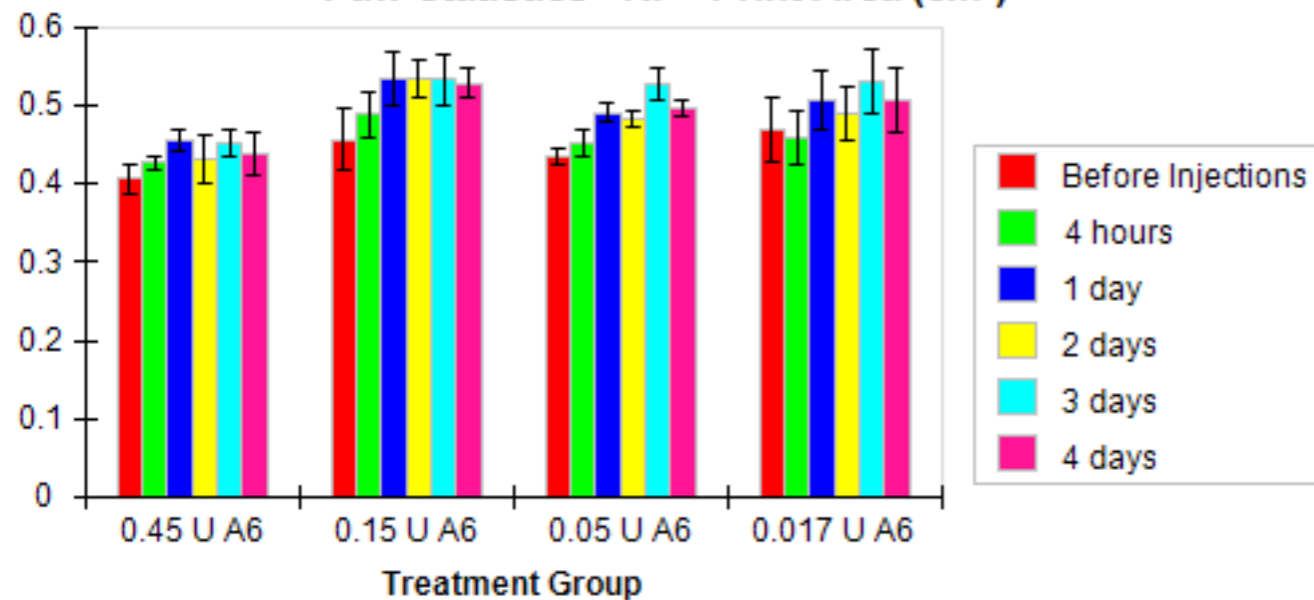**Paw Statistics - RH - Print Area (cm<sup>2</sup>)**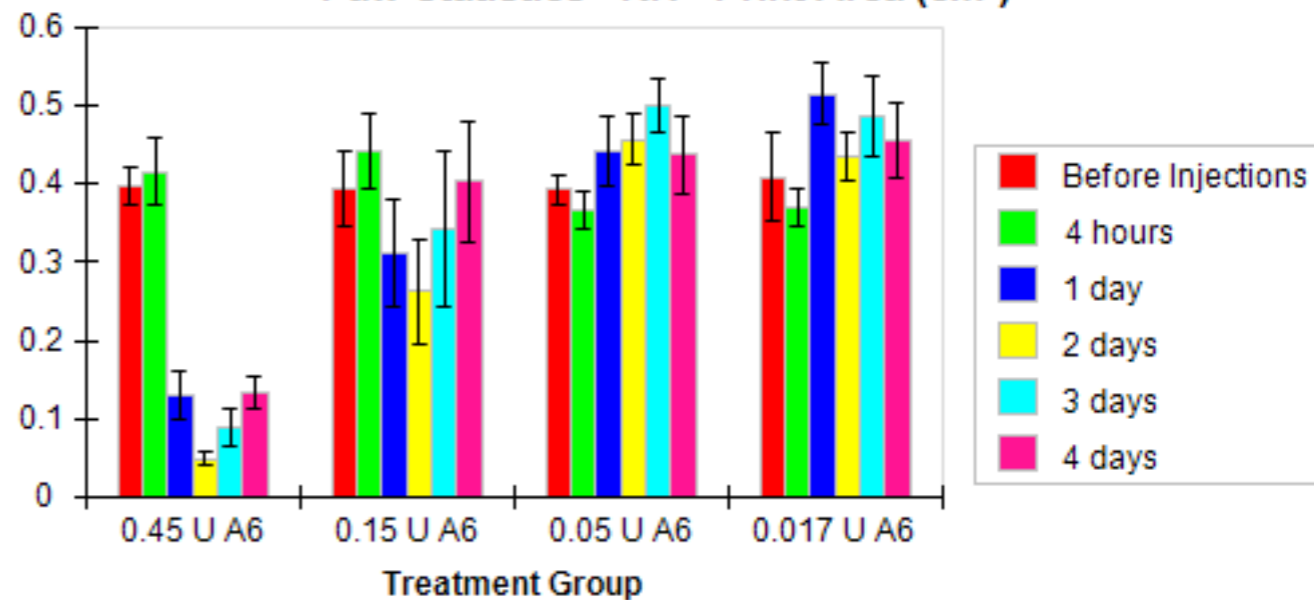**Paw Statistics - LF - Print Area (cm<sup>2</sup>)**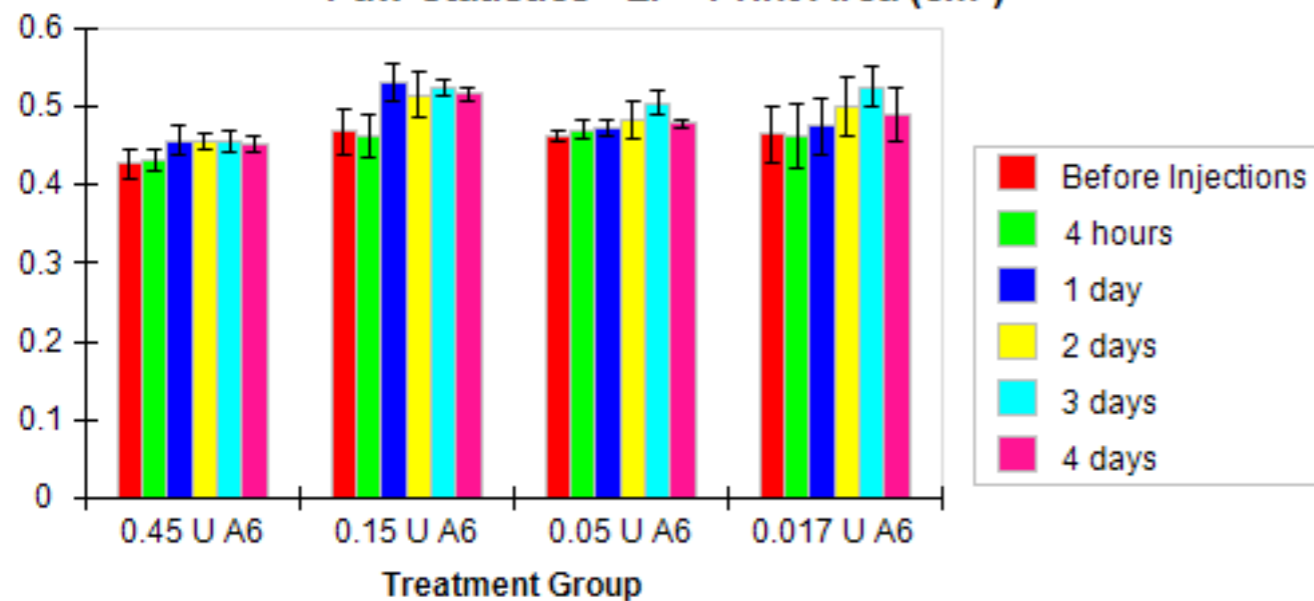**Paw Statistics - LH - Print Area (cm<sup>2</sup>)**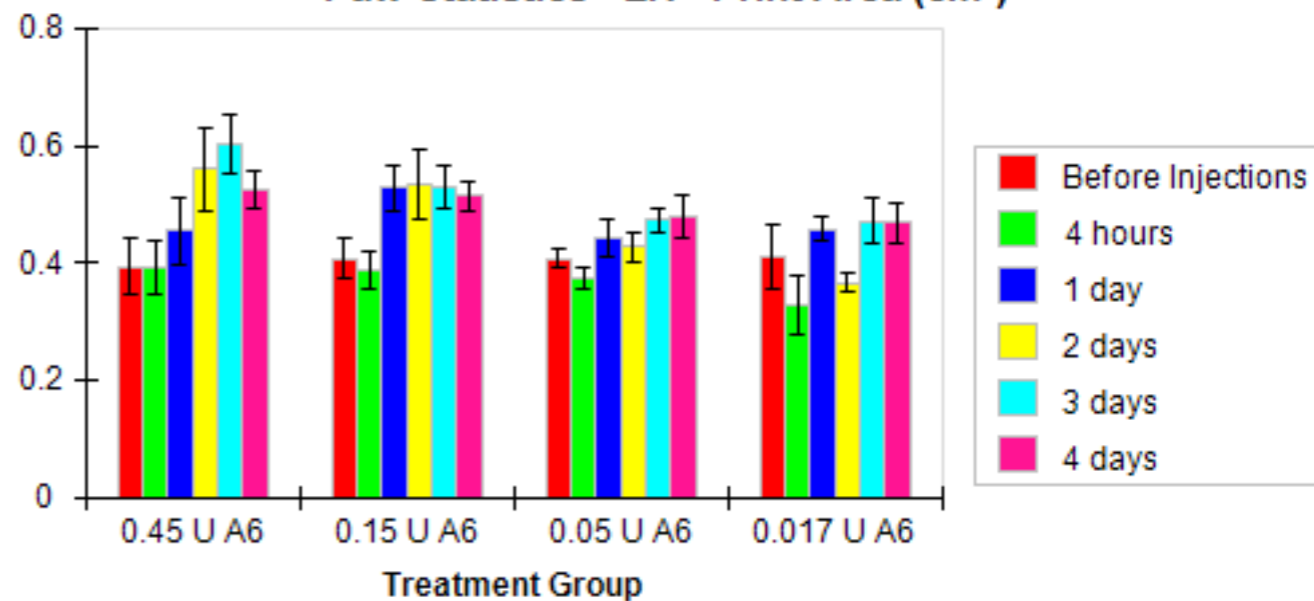

**Paw Statistics - RF - Max Intensity At (%)**

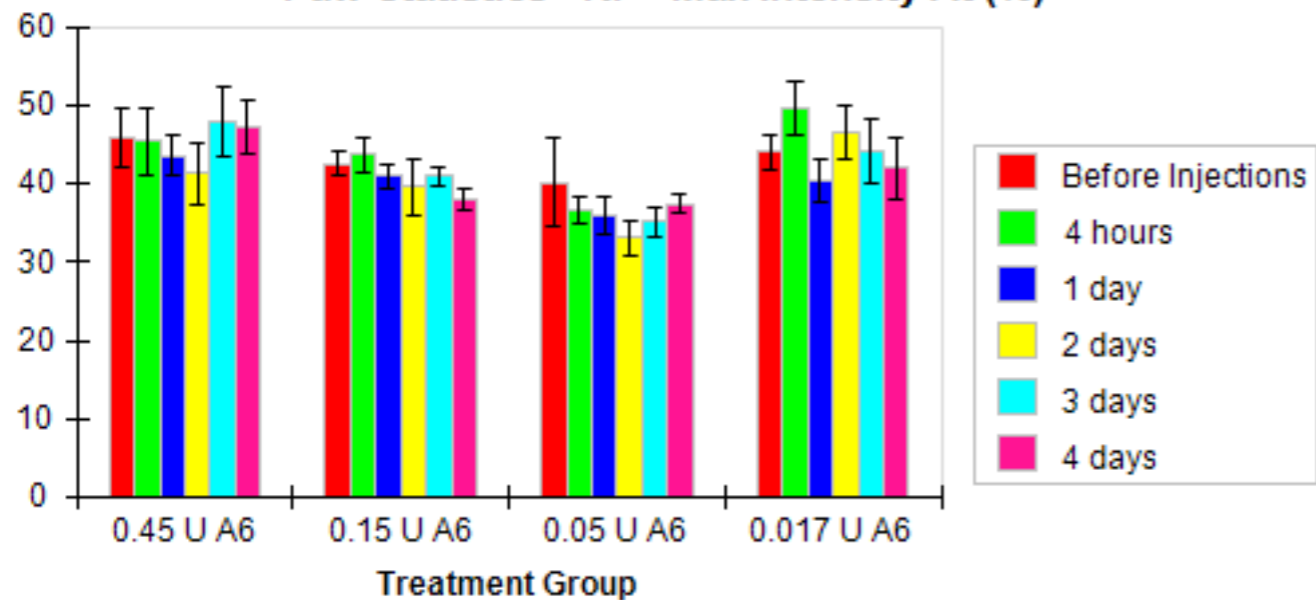

**Paw Statistics - RH - Max Intensity At (%)**

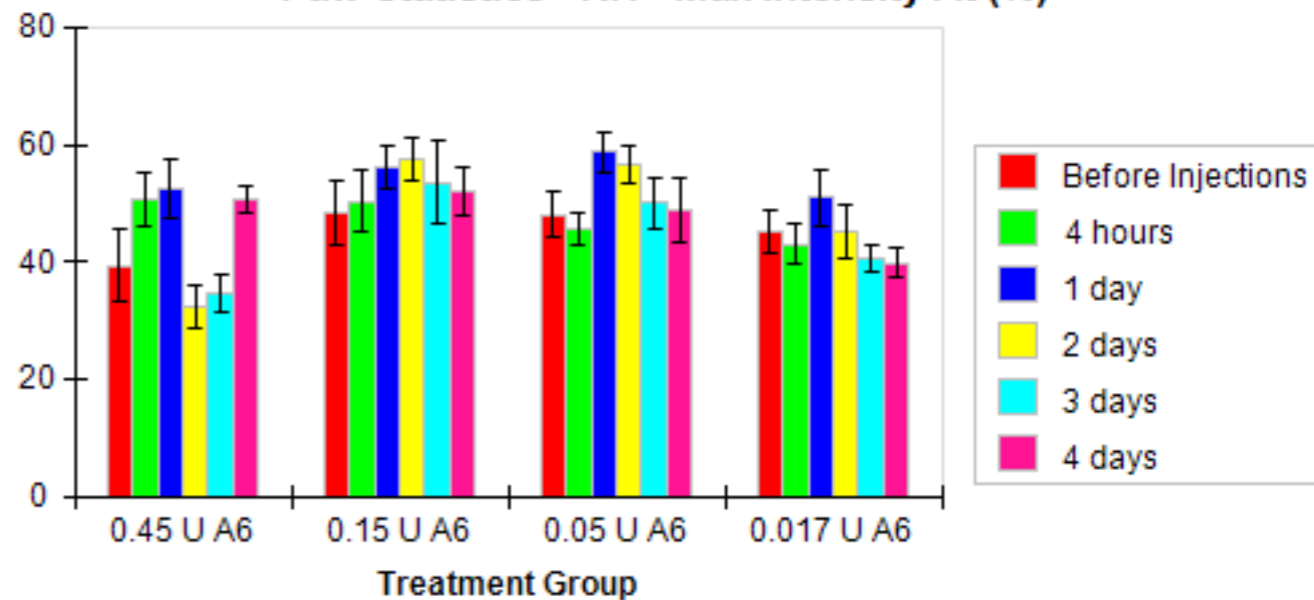

**Paw Statistics - LF - Max Intensity At (%)**

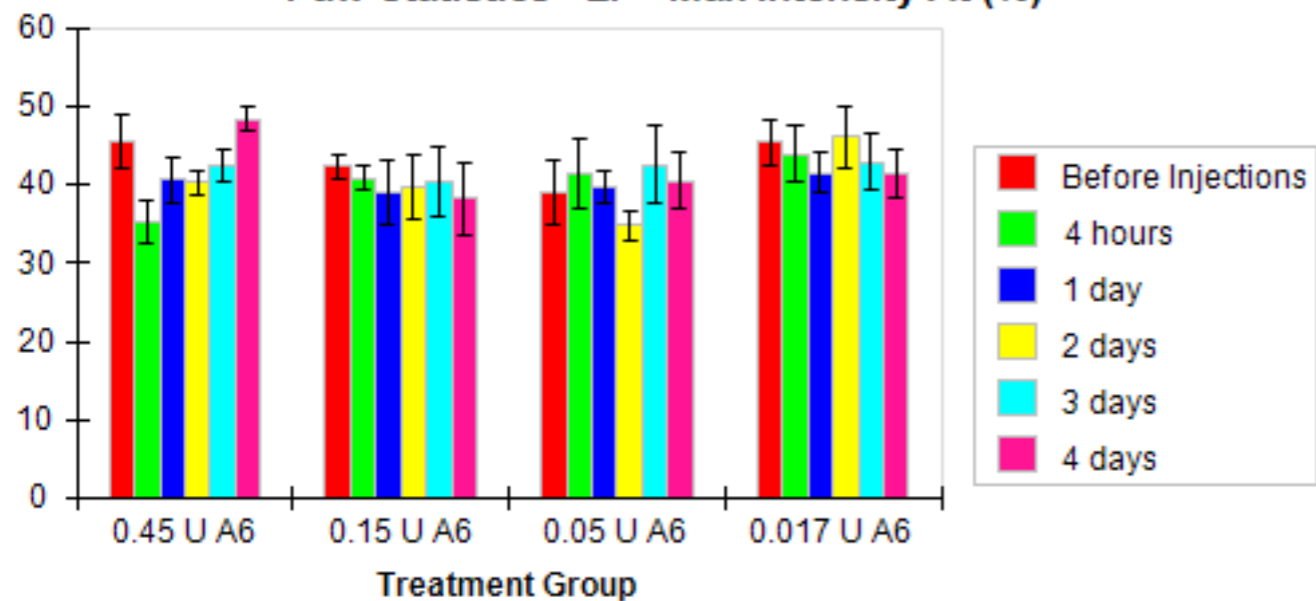

**Paw Statistics - LH - Max Intensity At (%)**

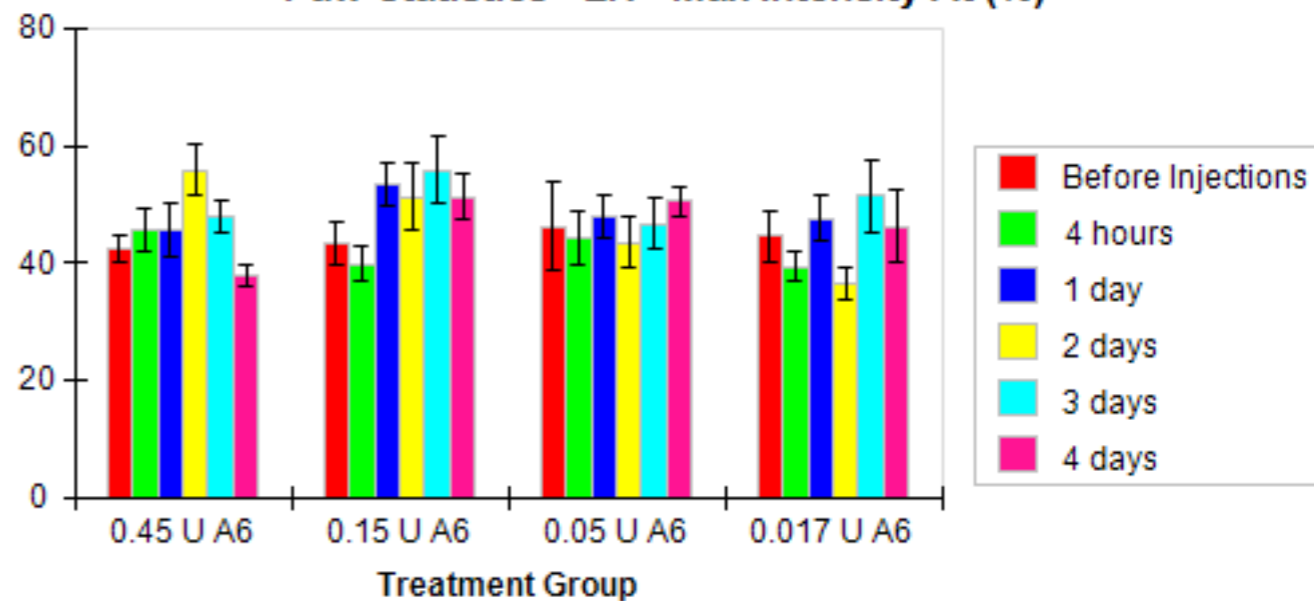

**Paw Statistics - RF - Max Intensity**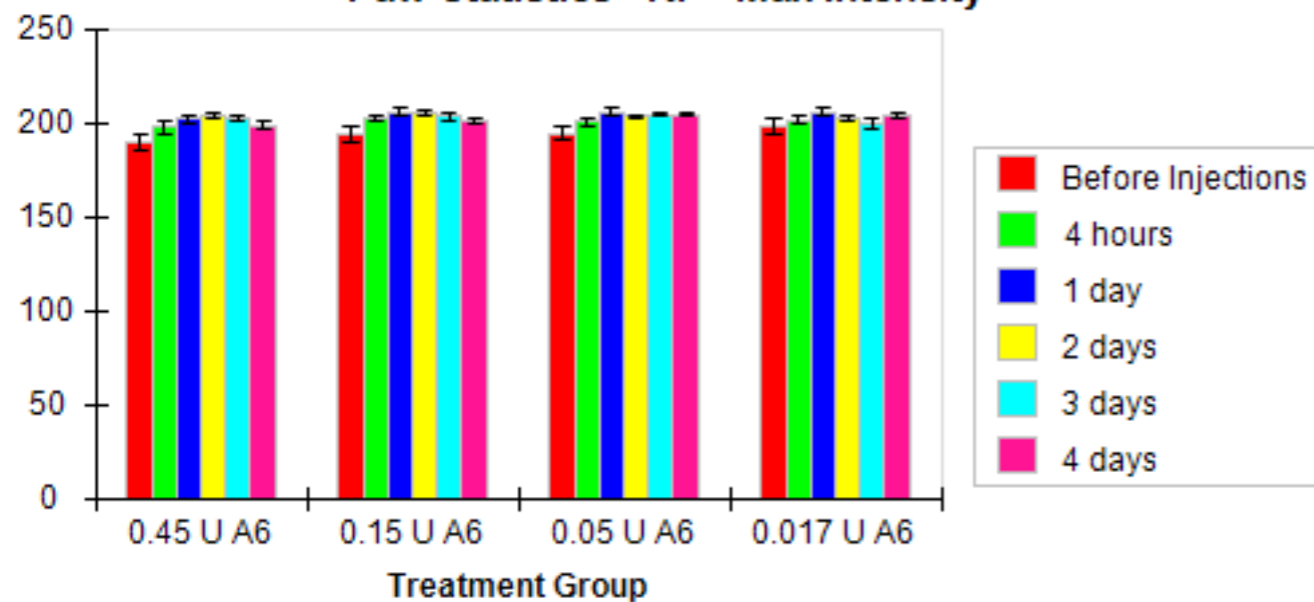**Paw Statistics - RH - Max Intensity**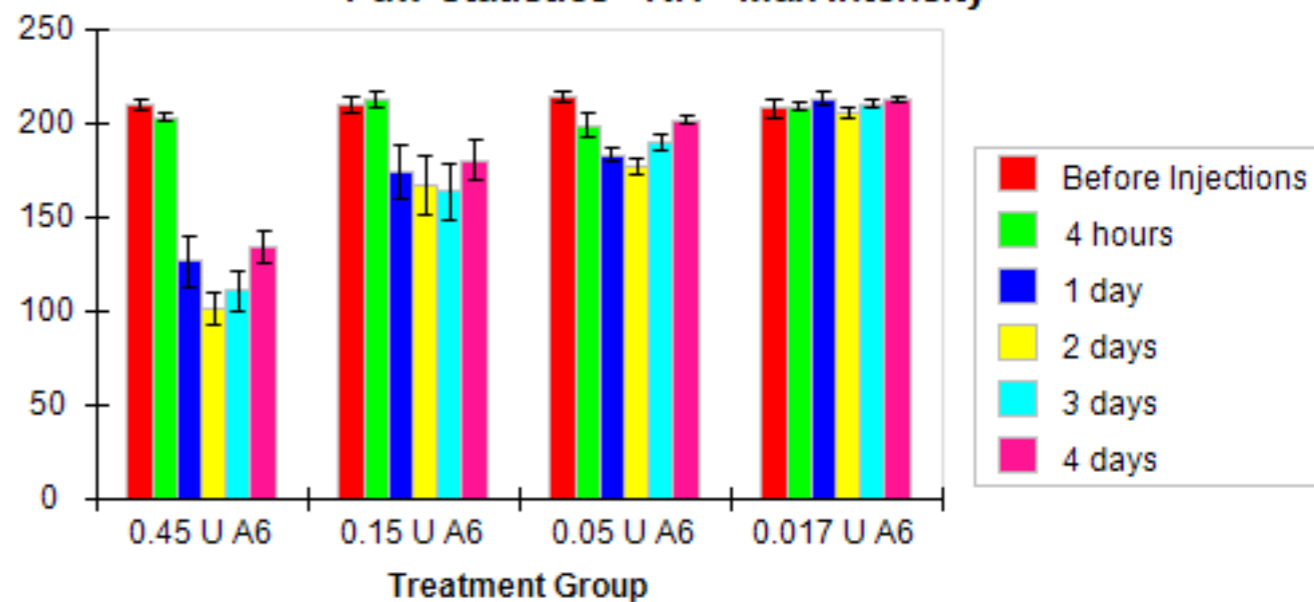**Paw Statistics - LF - Max Intensity**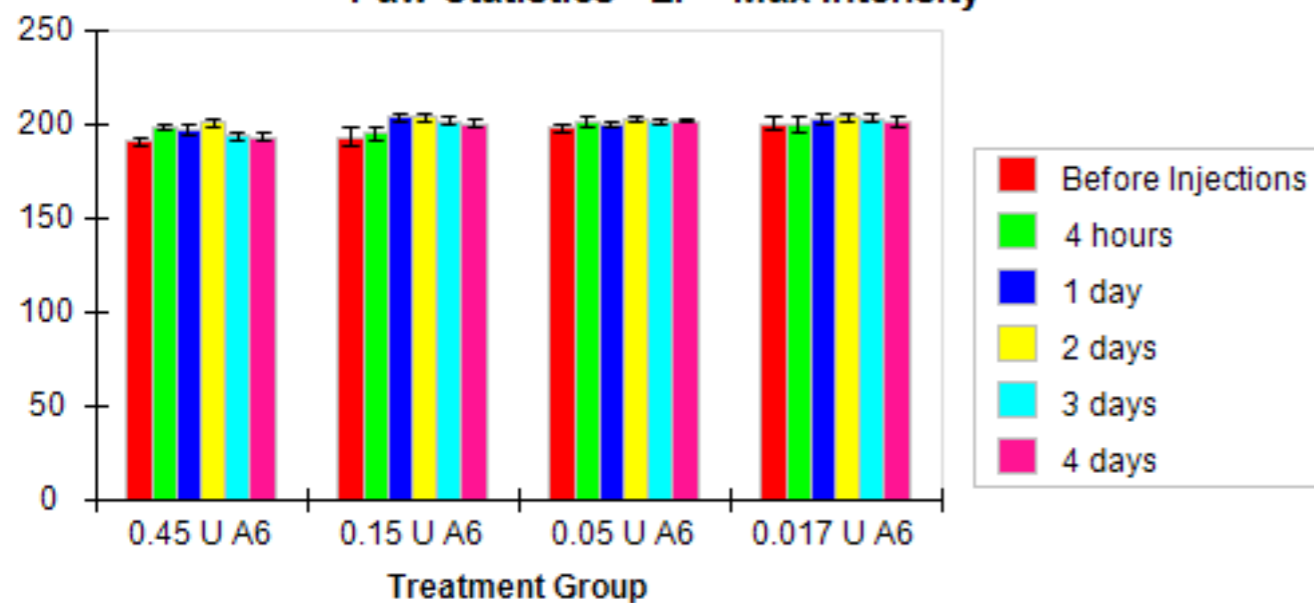**Paw Statistics - LH - Max Intensity**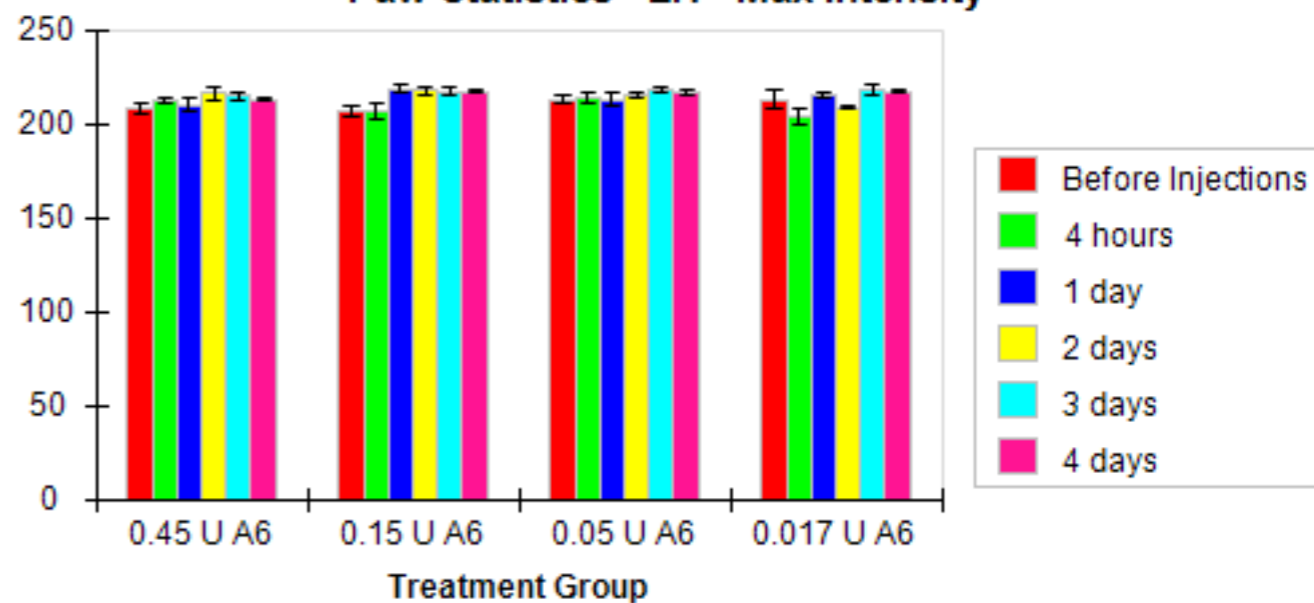

**Paw Statistics - RF - Min Intensity**

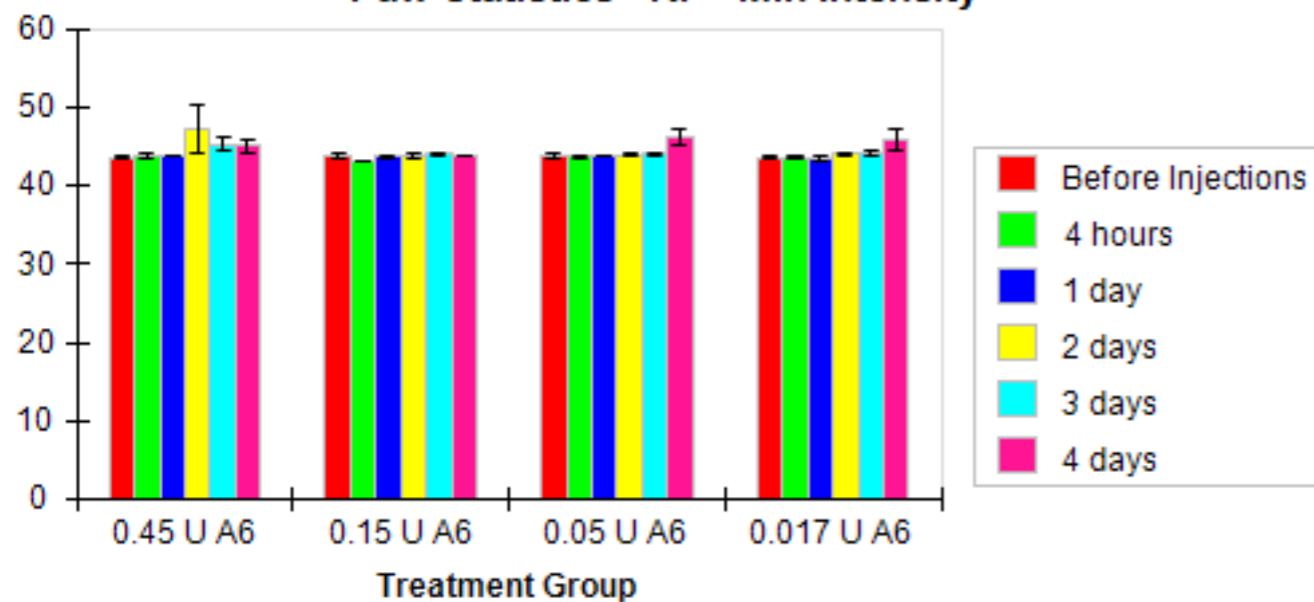

**Paw Statistics - RH - Min Intensity**

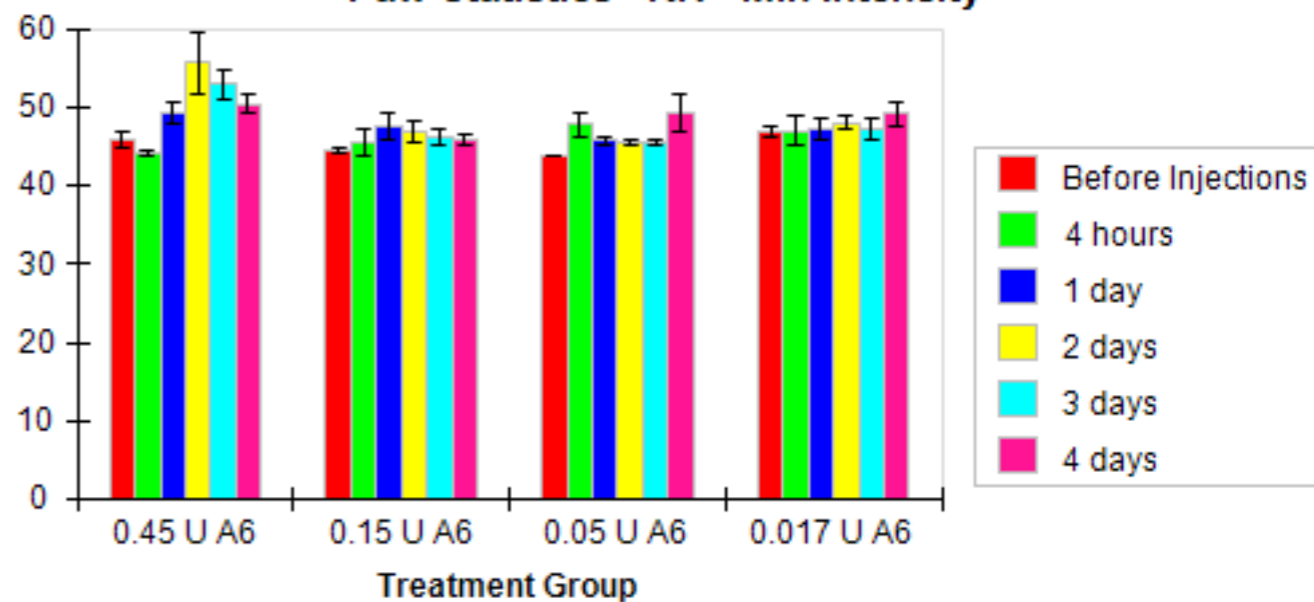

**Paw Statistics - LF - Min Intensity**

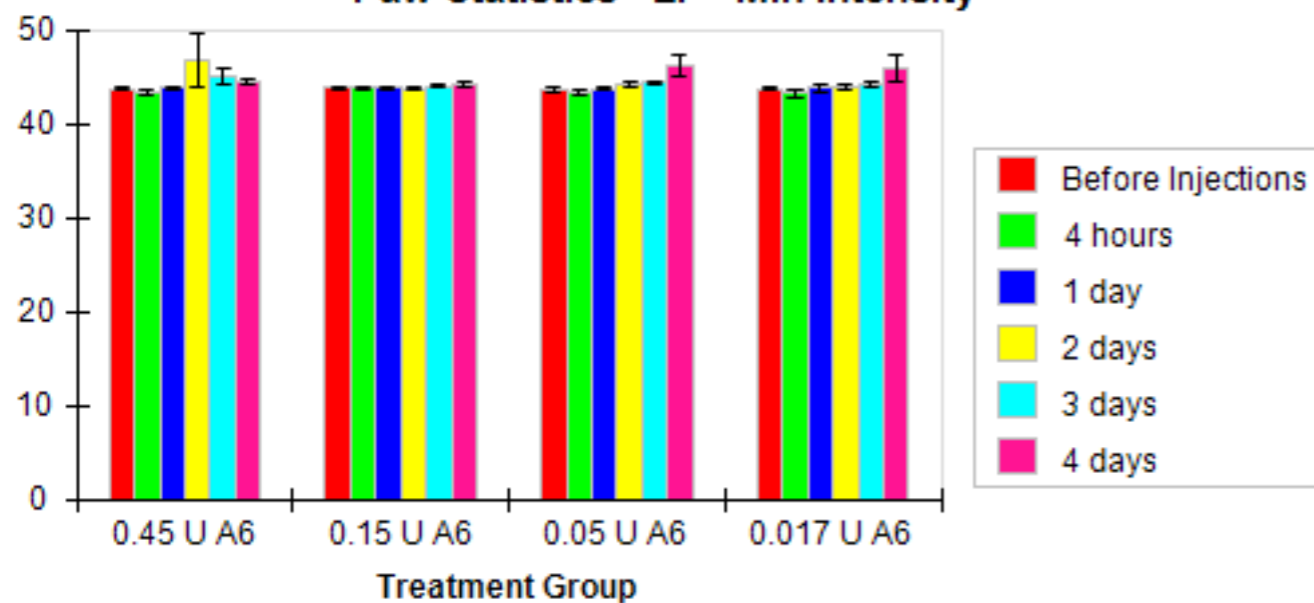

**Paw Statistics - LH - Min Intensity**

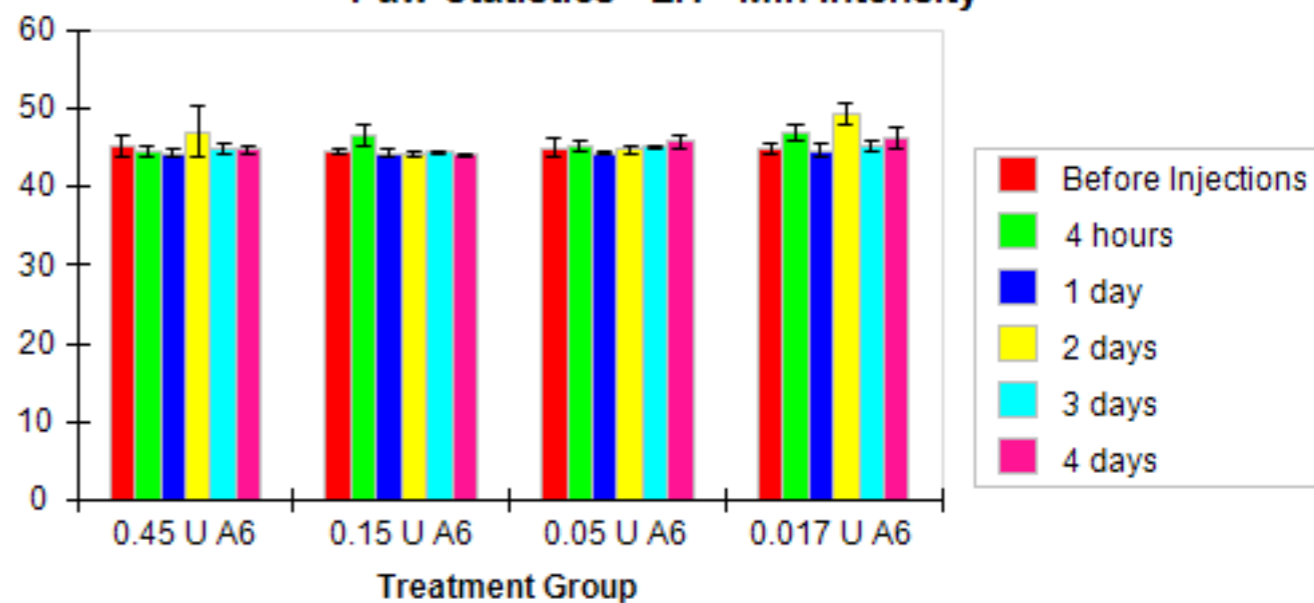

**Paw Statistics - RF - Mean Intensity**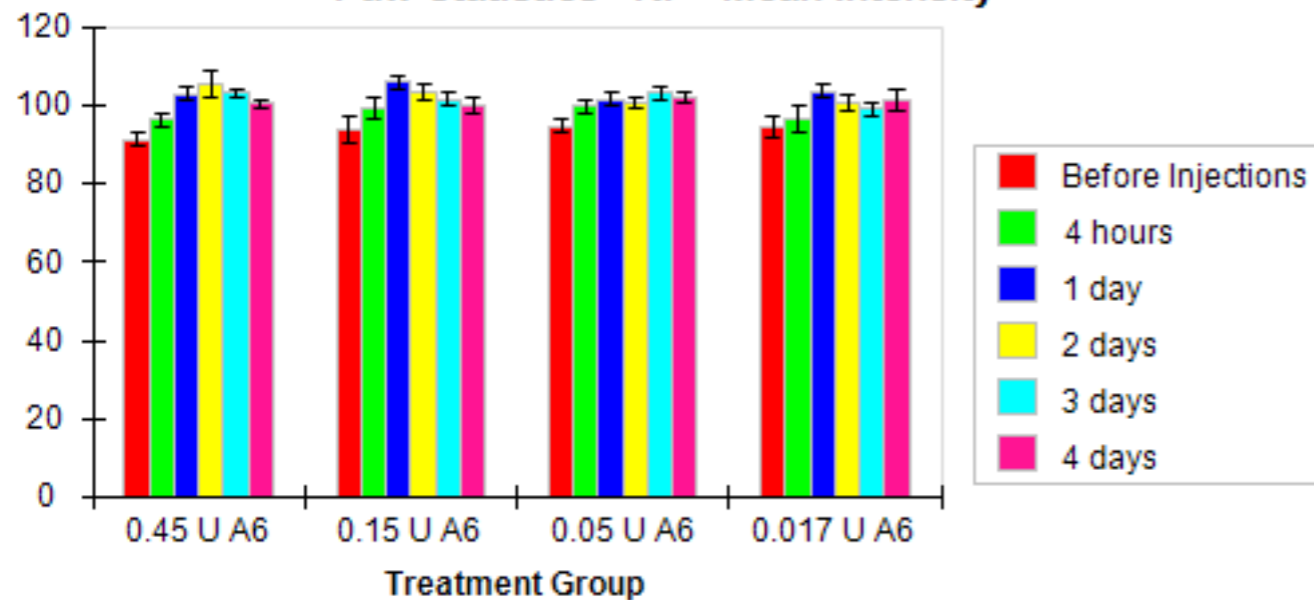**Paw Statistics - RH - Mean Intensity**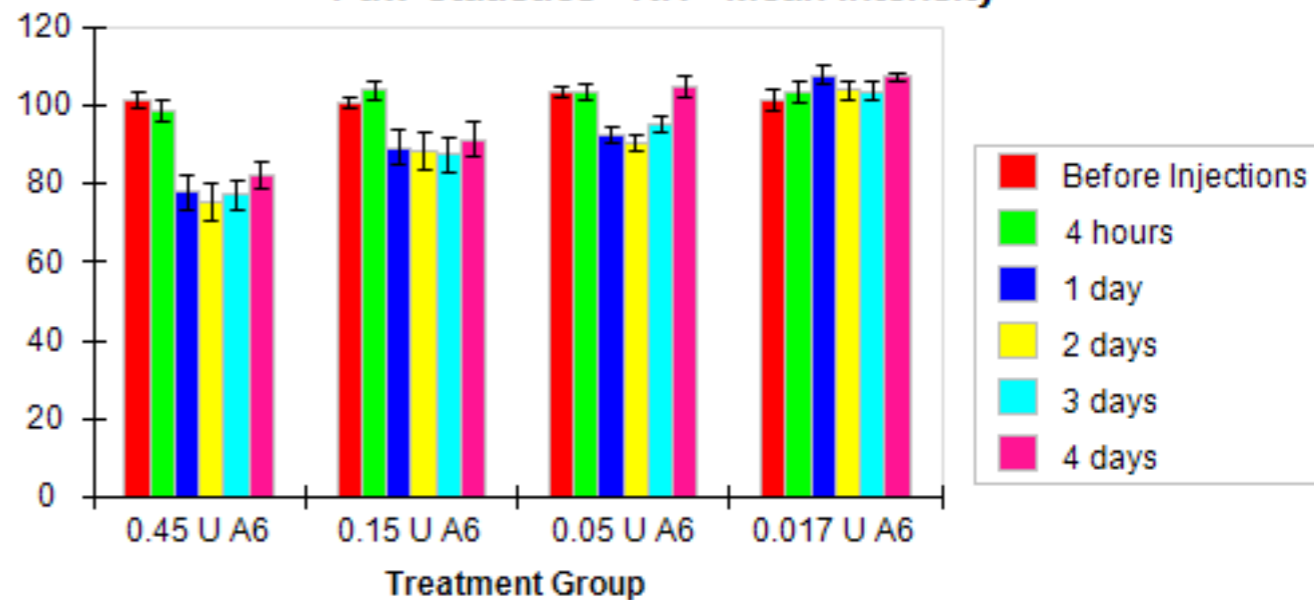**Paw Statistics - LF - Mean Intensity**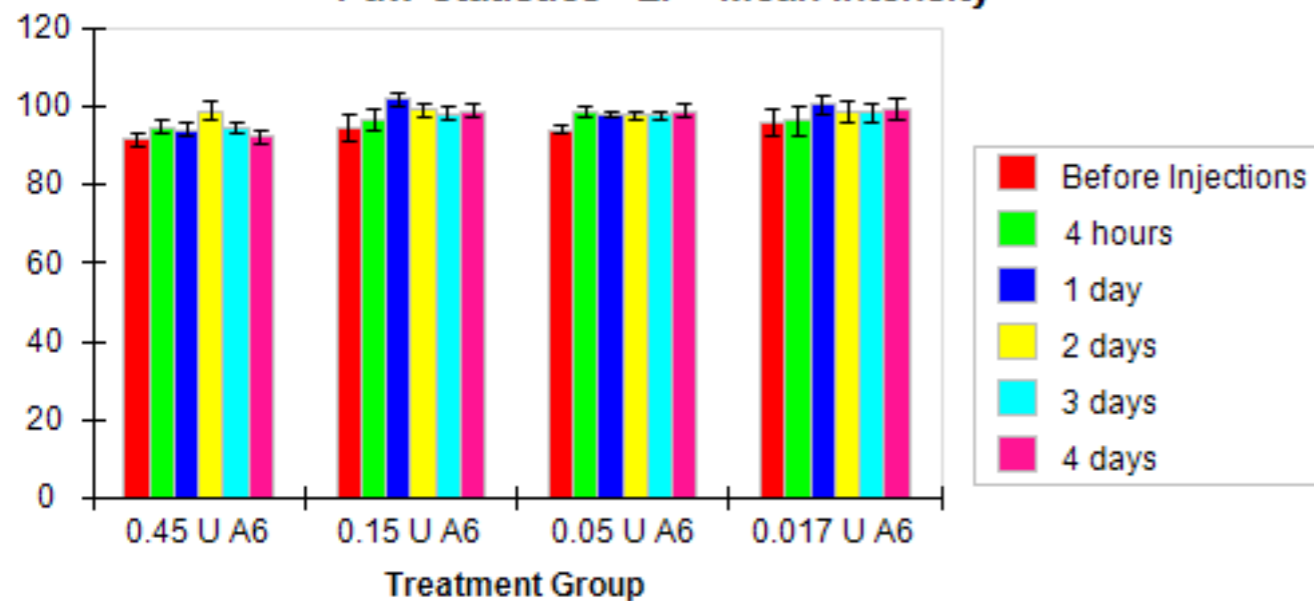**Paw Statistics - LH - Mean Intensity**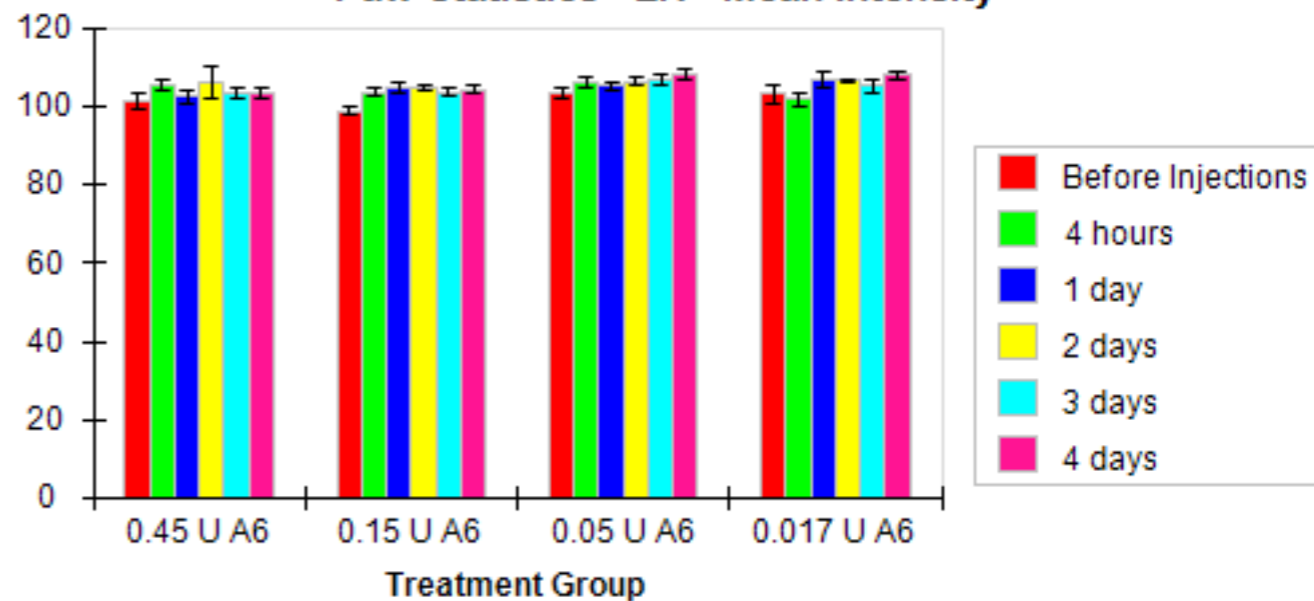

**Paw Statistics - RF - Mean Intensity of the 15 Most Intense Pixels**

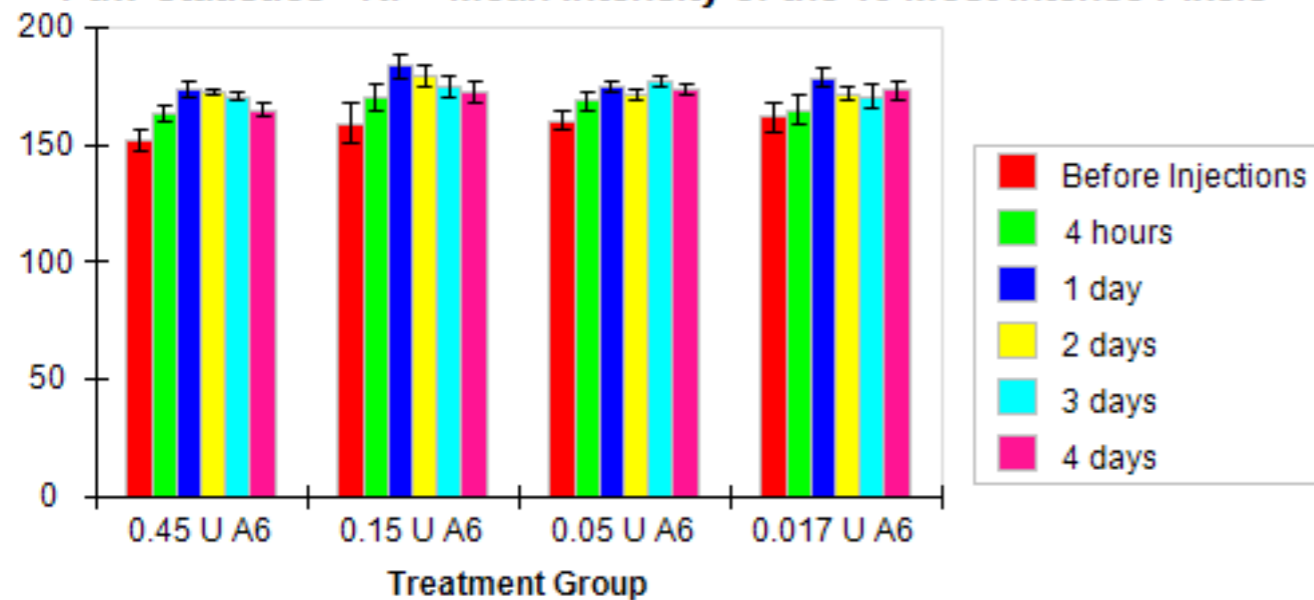

**Paw Statistics - RH - Mean Intensity of the 15 Most Intense Pixels**

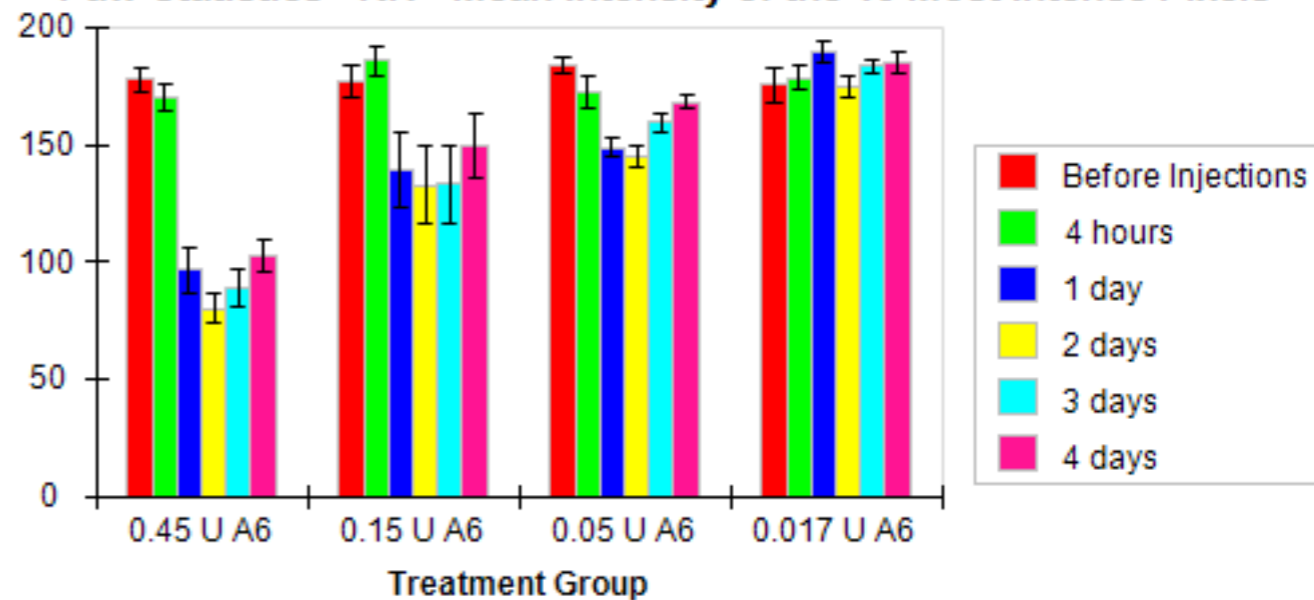

**Paw Statistics - LF - Mean Intensity of the 15 Most Intense Pixels**

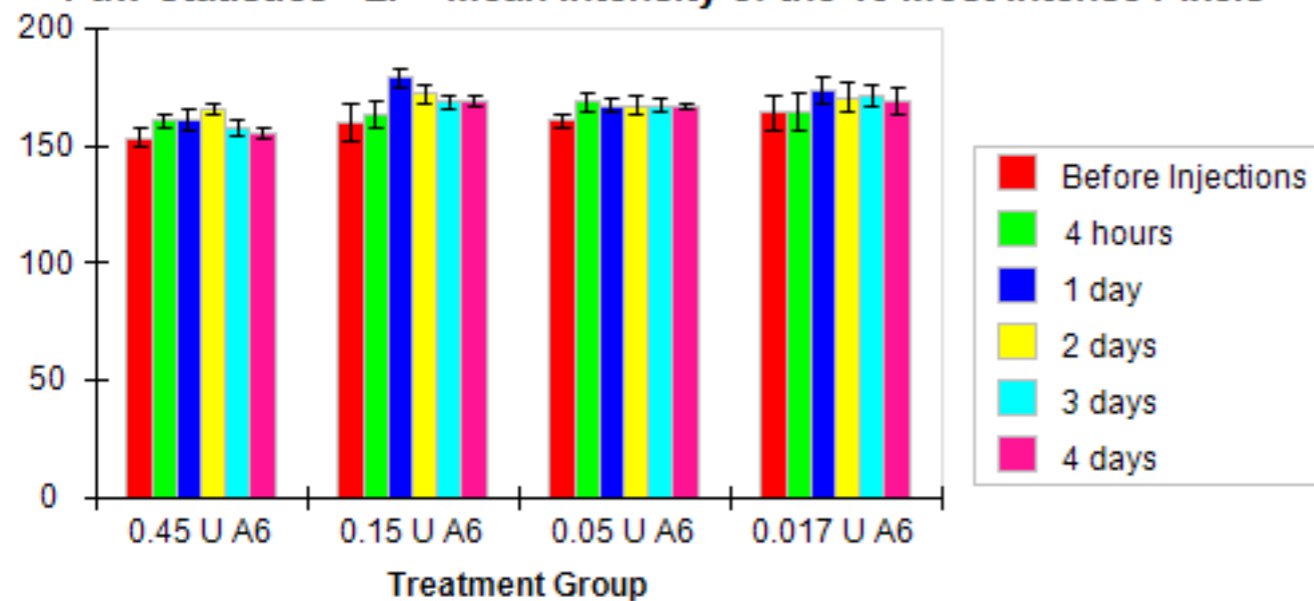

**Paw Statistics - LH - Mean Intensity of the 15 Most Intense Pixels**

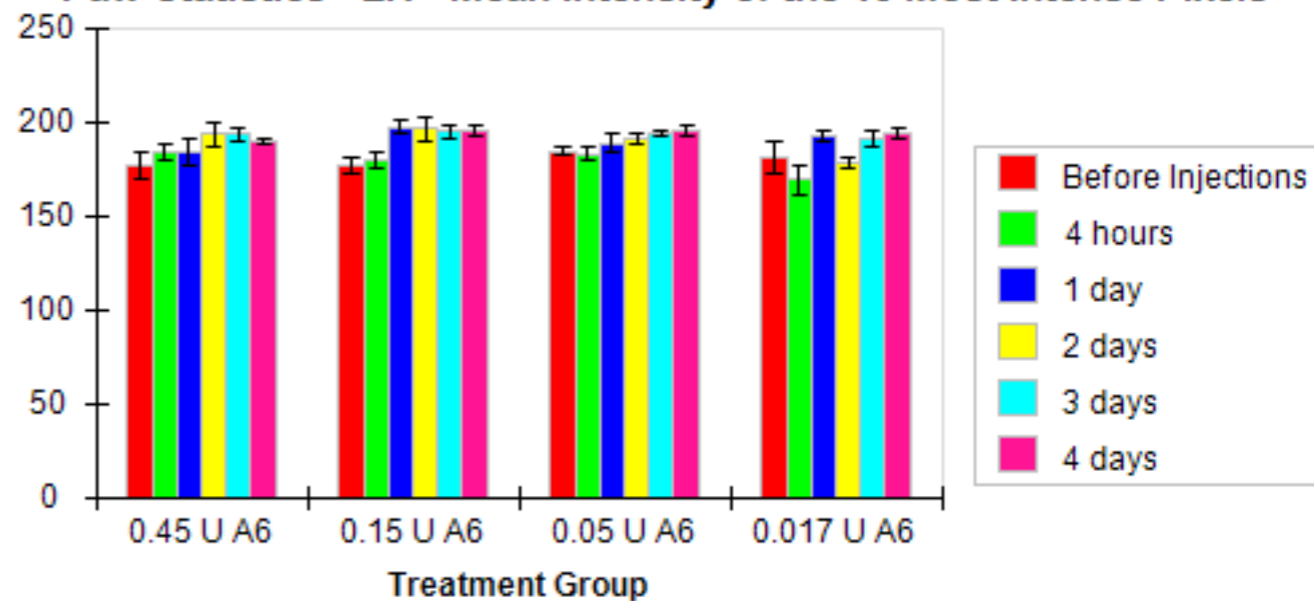

**Paw Statistics - RF - Swing (s)**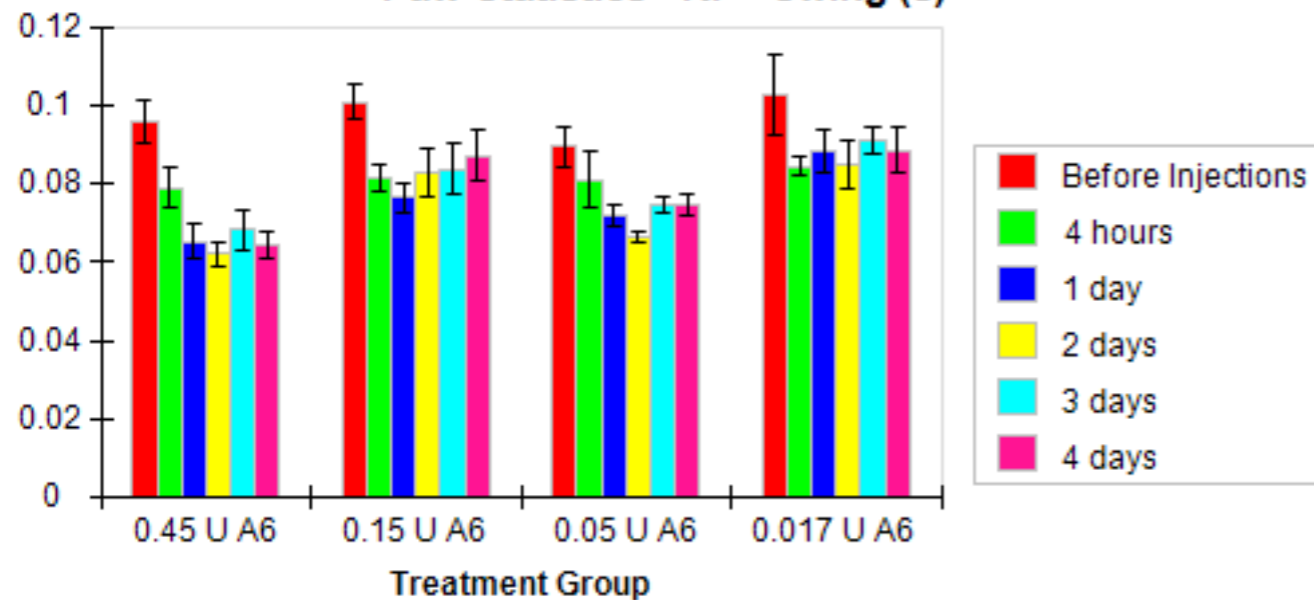**Paw Statistics - RH - Swing (s)**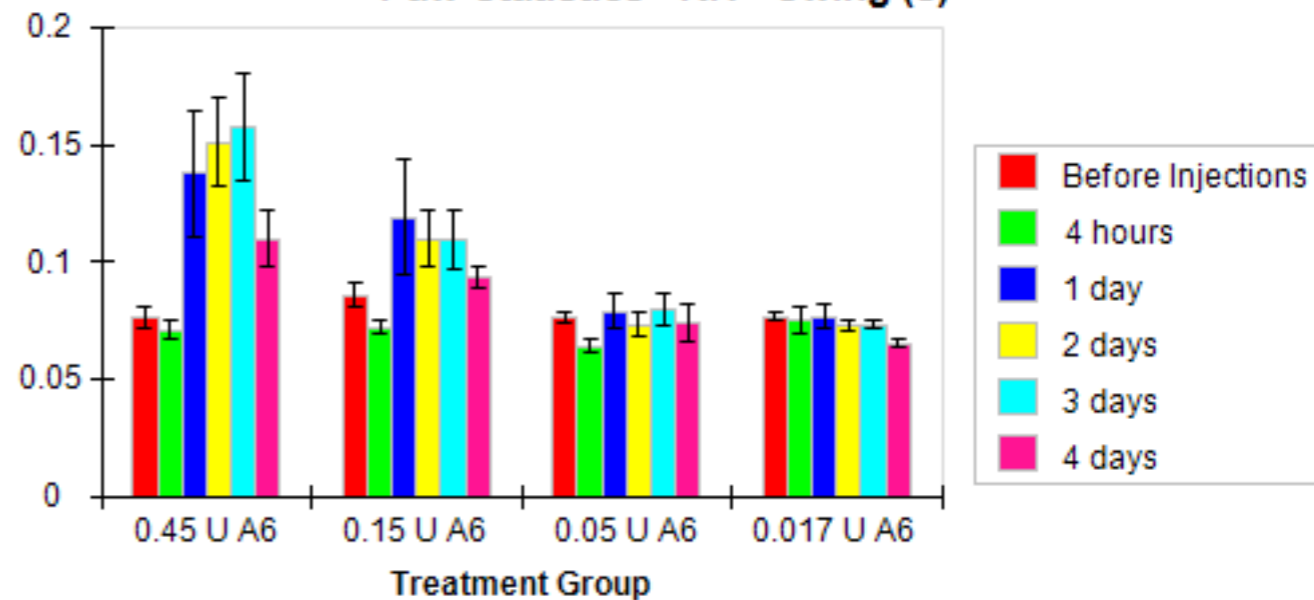**Paw Statistics - LF - Swing (s)**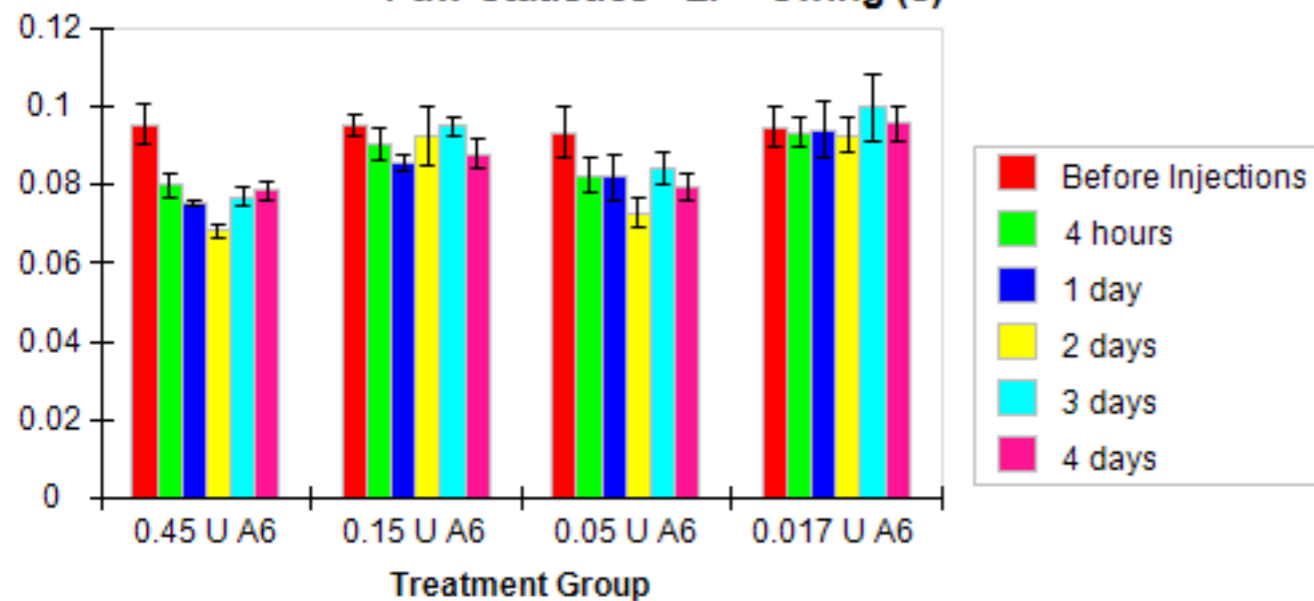**Paw Statistics - LH - Swing (s)**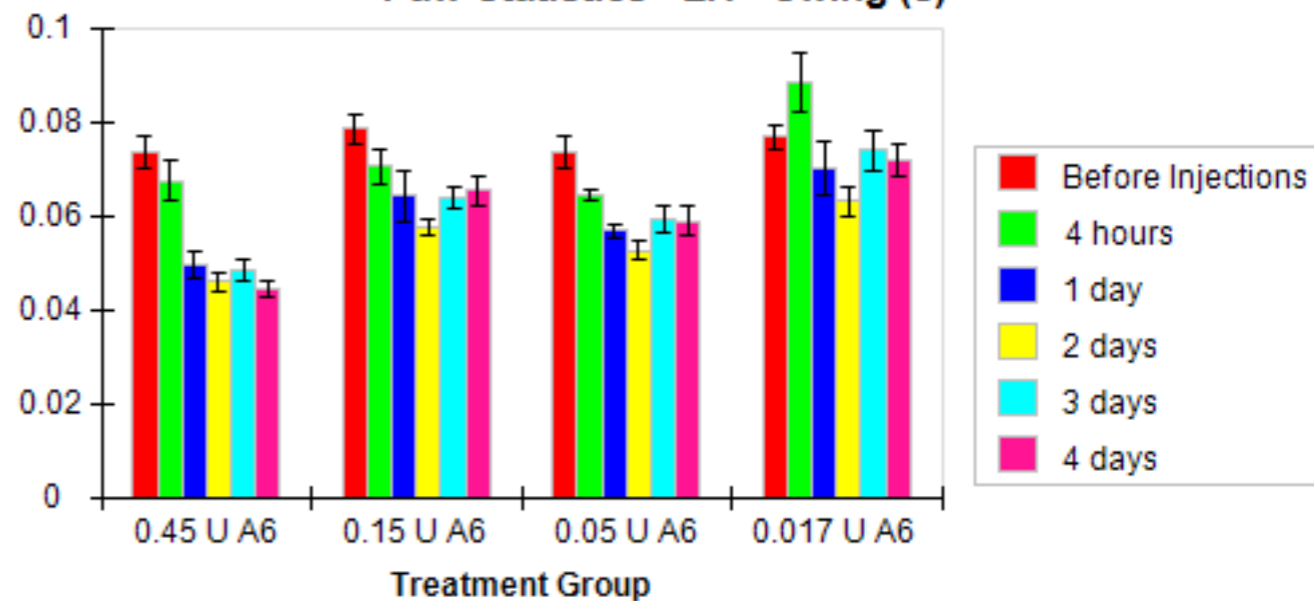

**Paw Statistics - RF - Swing Speed (cm/s)**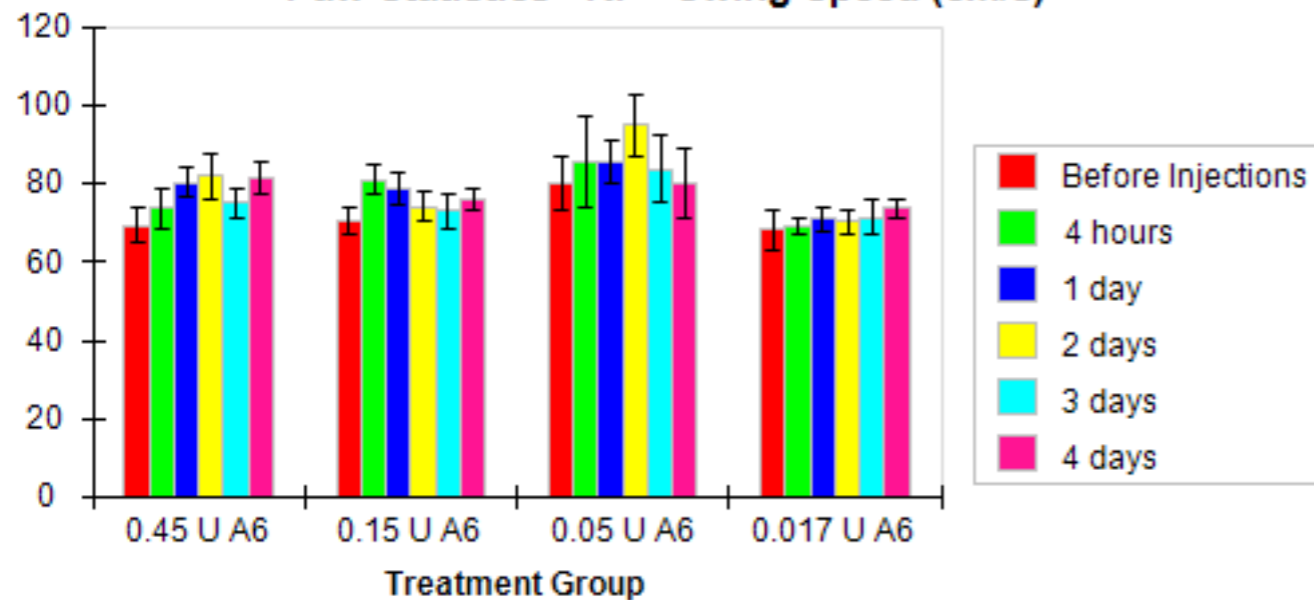**Paw Statistics - RH - Swing Speed (cm/s)**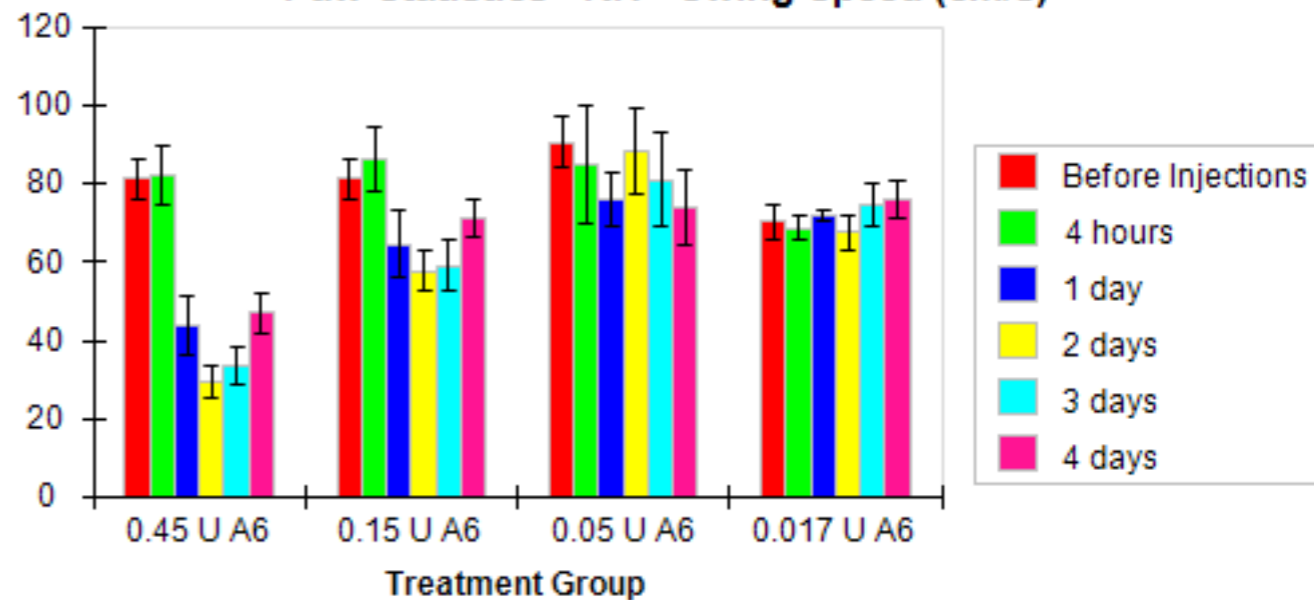**Paw Statistics - LF - Swing Speed (cm/s)**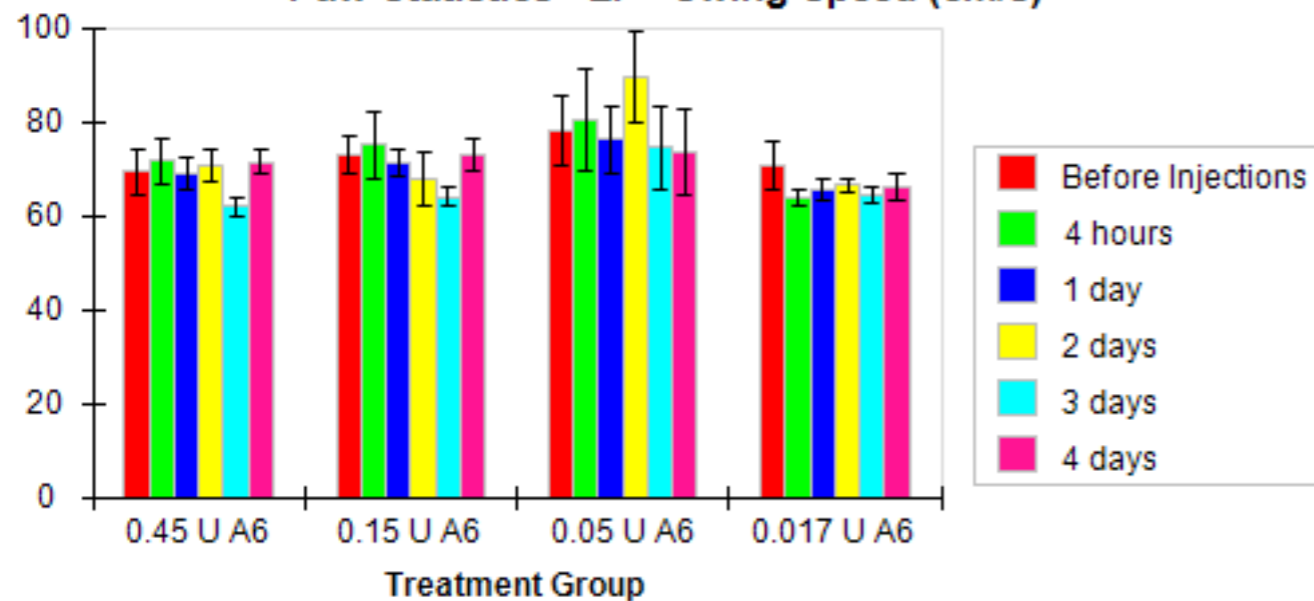**Paw Statistics - LH - Swing Speed (cm/s)**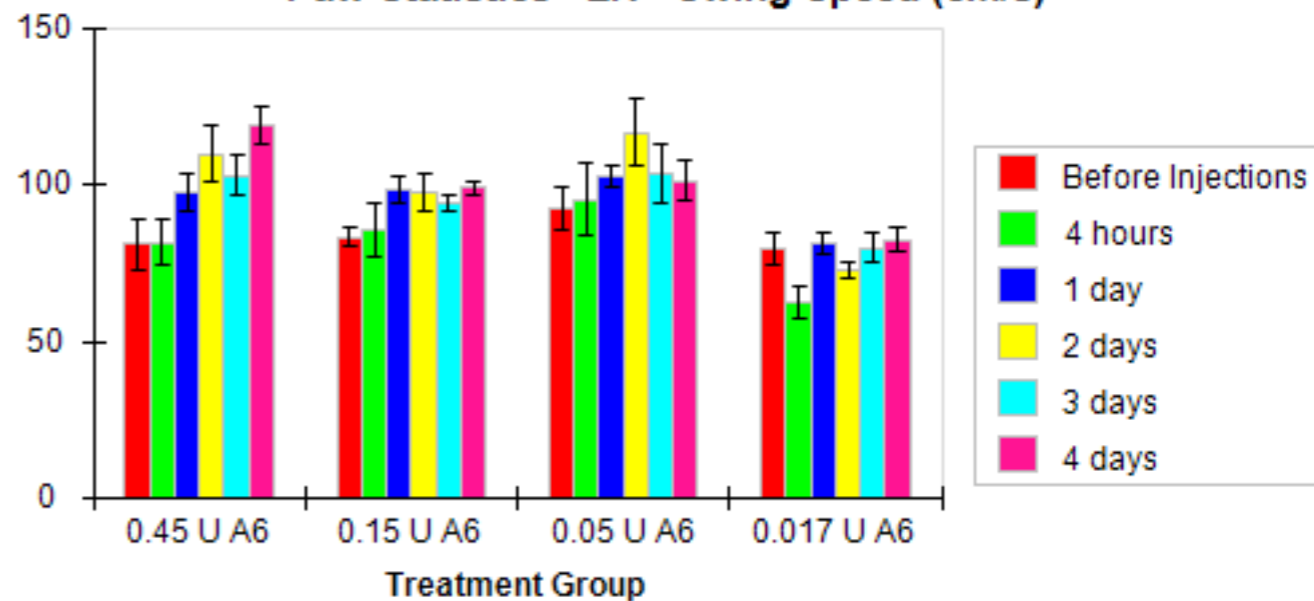



**Paw Statistics - RF - Stride Length (cm)**

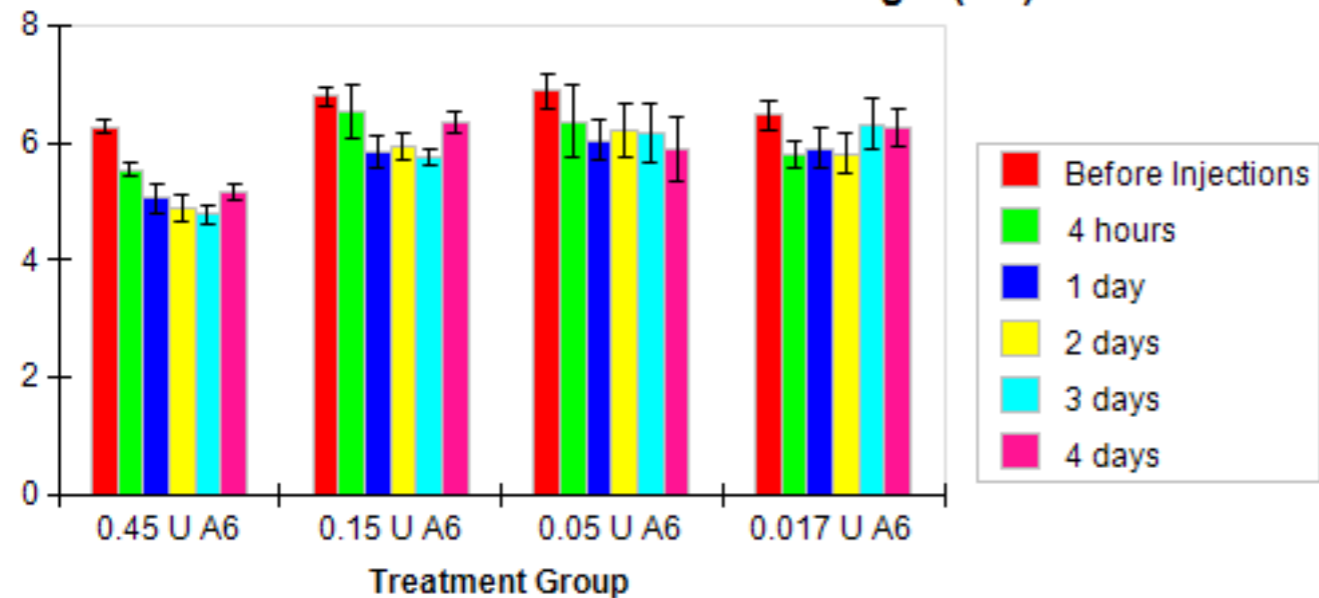

**Paw Statistics - RH - Stride Length (cm)**

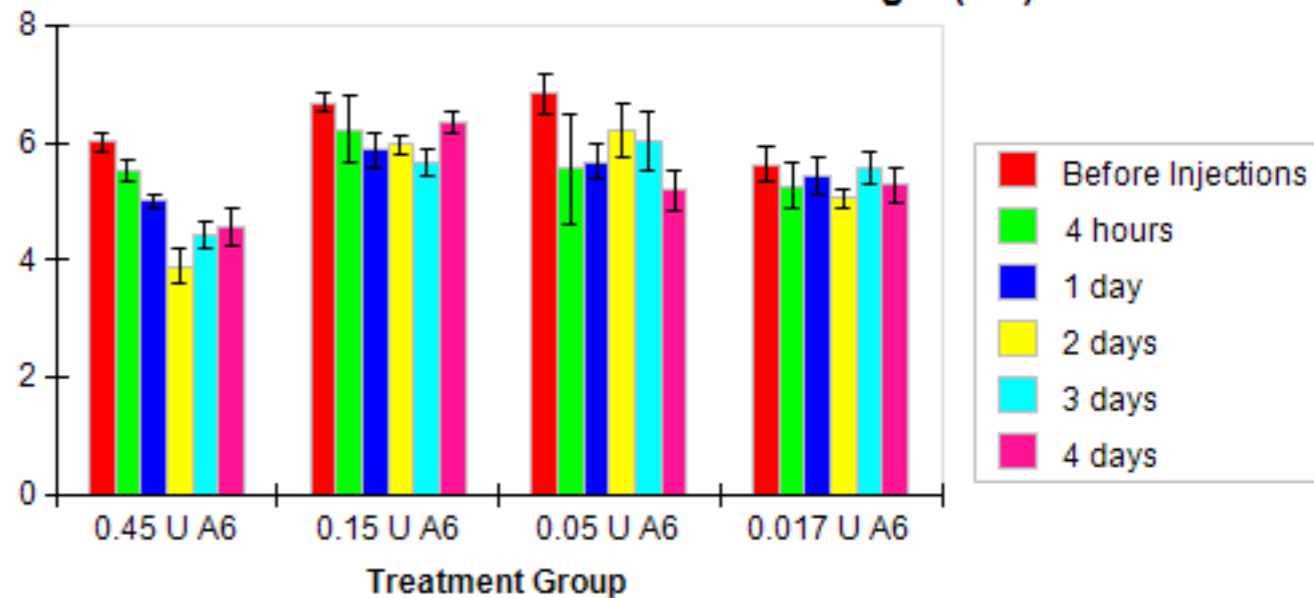

**Paw Statistics - LF - Stride Length (cm)**

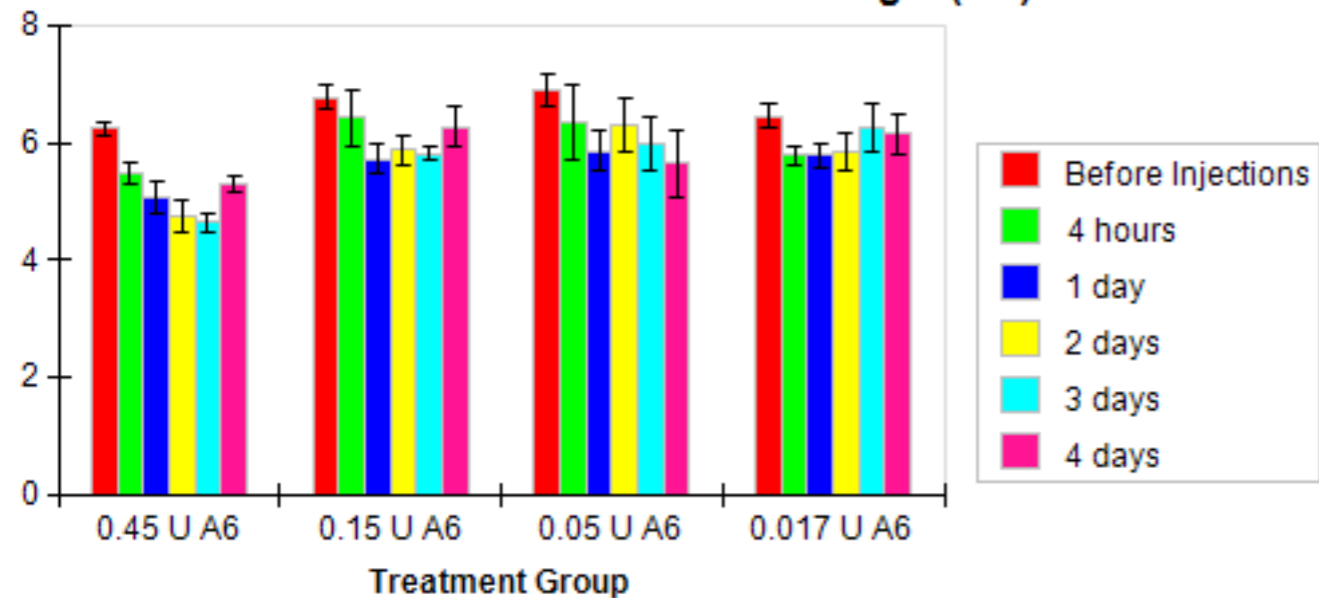

**Paw Statistics - LH - Stride Length (cm)**

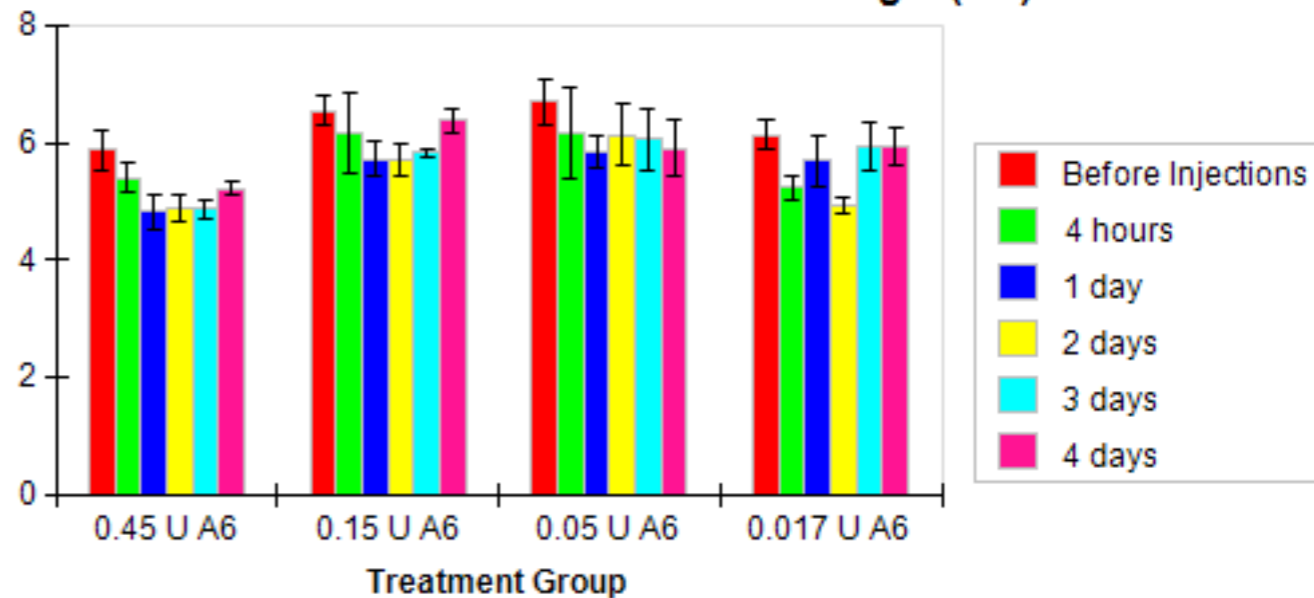

**Paw Statistics - RF - Step Cycle (s)**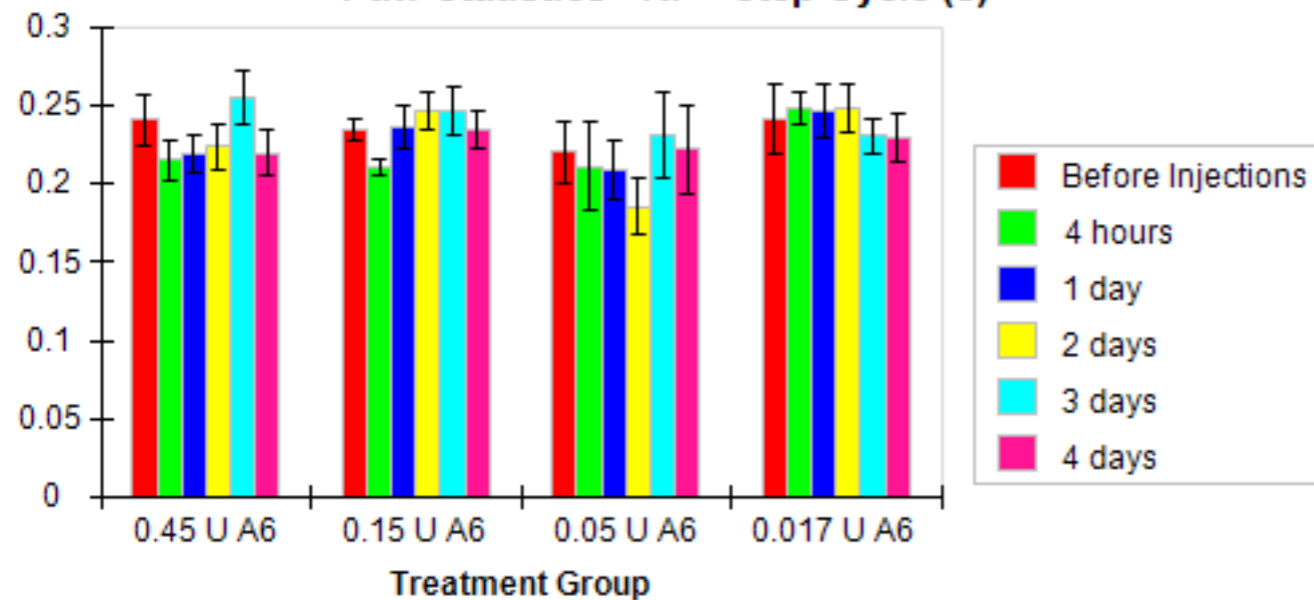**Paw Statistics - RH - Step Cycle (s)**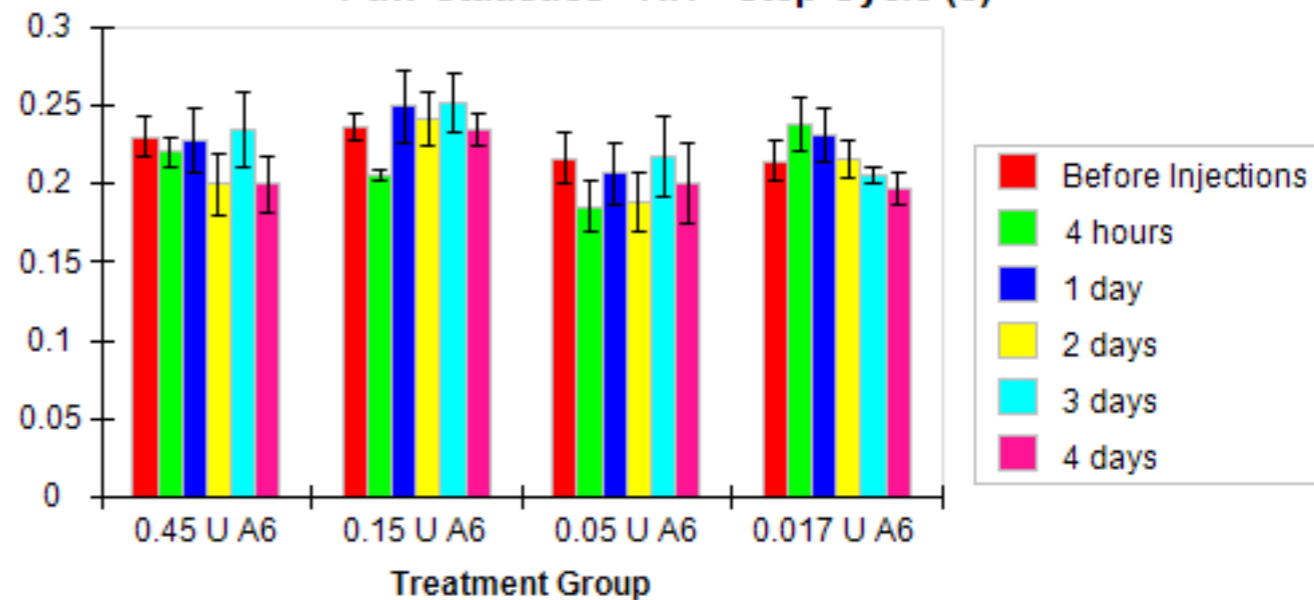**Paw Statistics - LF - Step Cycle (s)**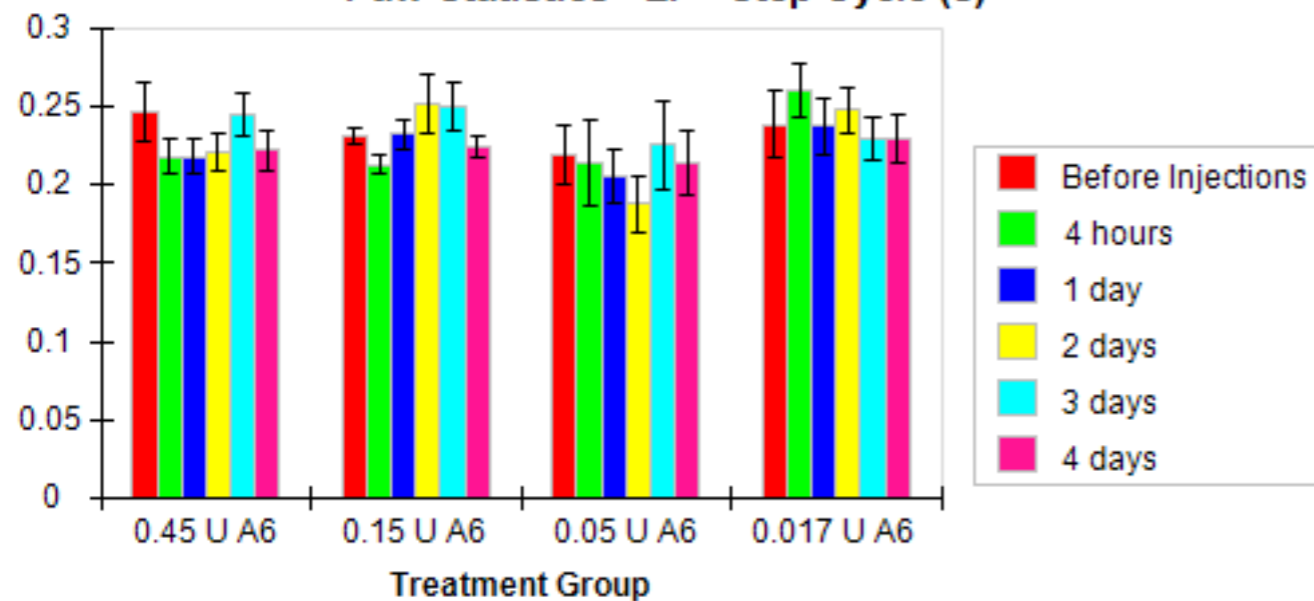**Paw Statistics - LH - Step Cycle (s)**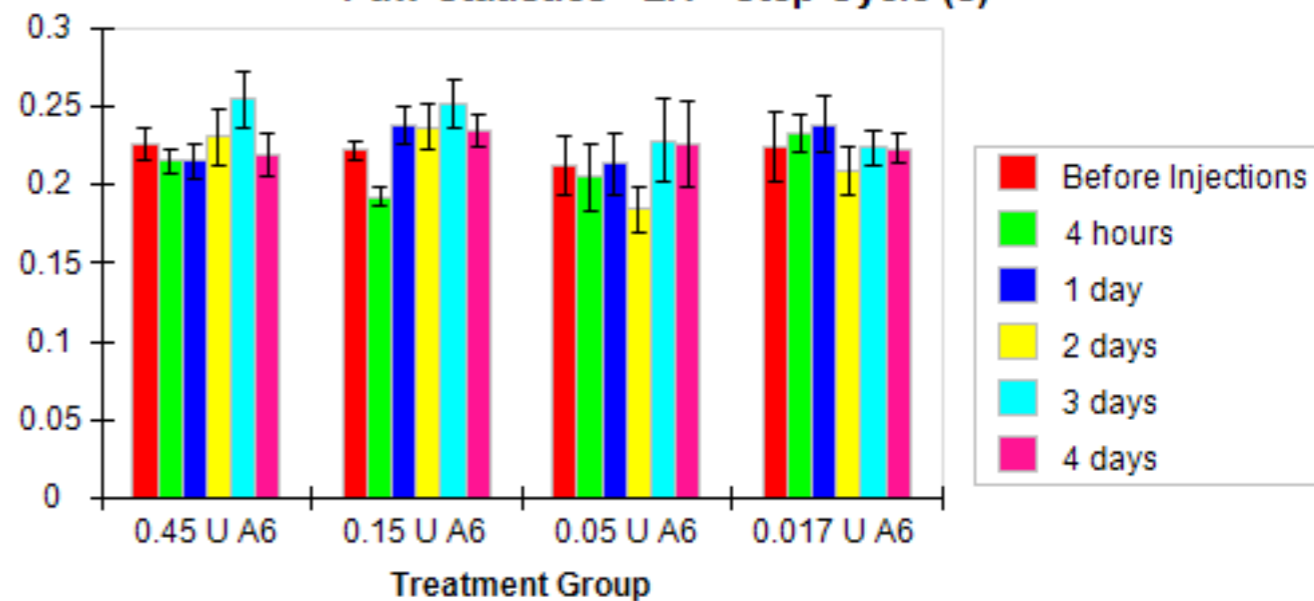

**Paw Statistics - RF - Duty Cycle (%)**

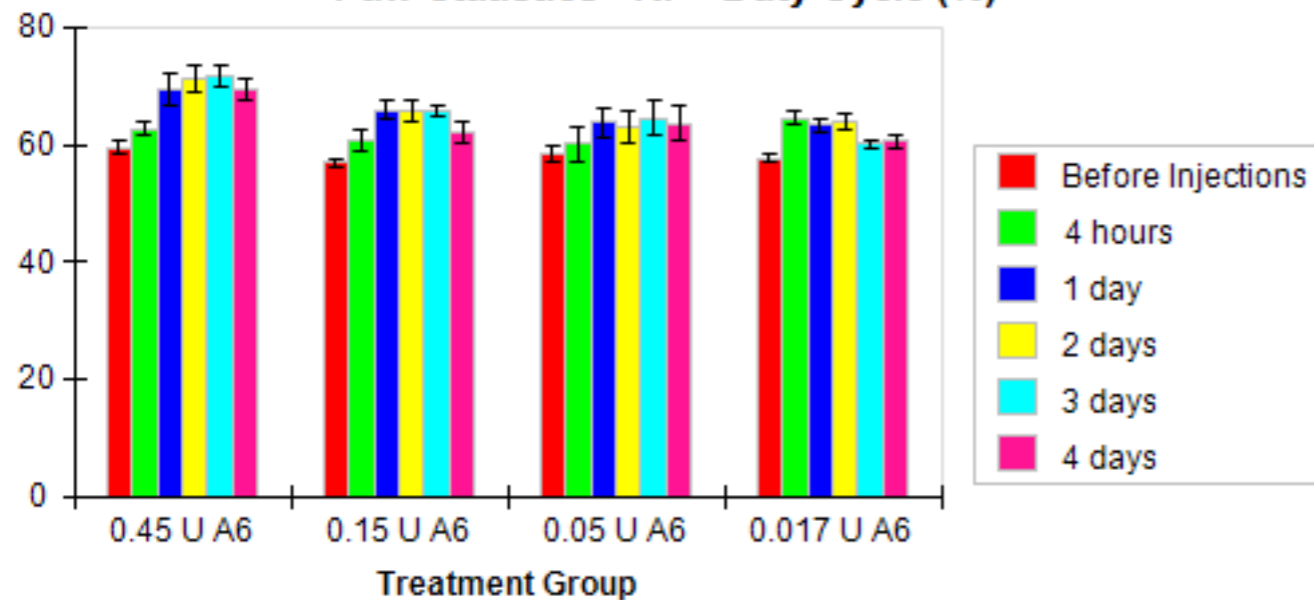

**Paw Statistics - RH - Duty Cycle (%)**

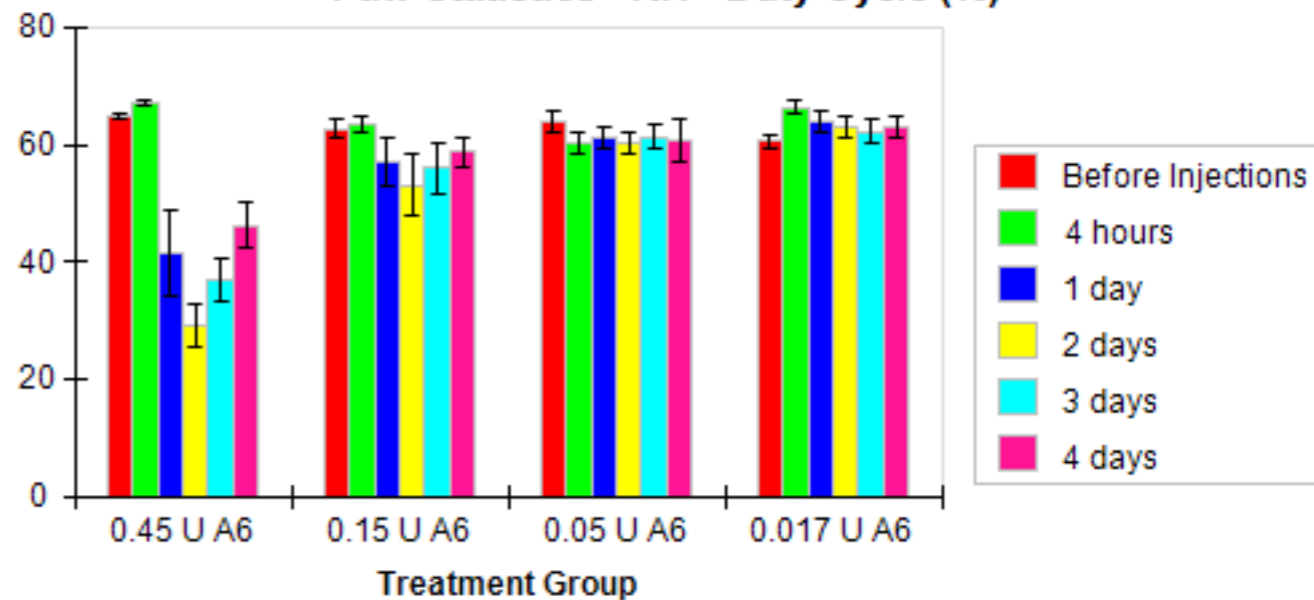

**Paw Statistics - LF - Duty Cycle (%)**

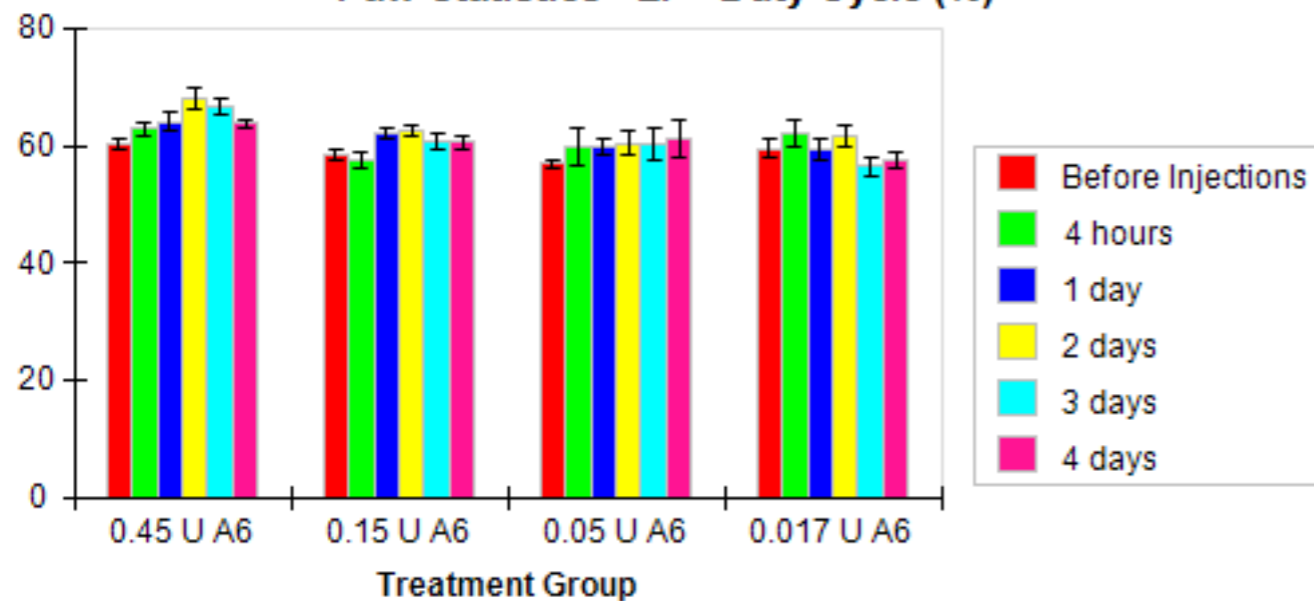

**Paw Statistics - LH - Duty Cycle (%)**

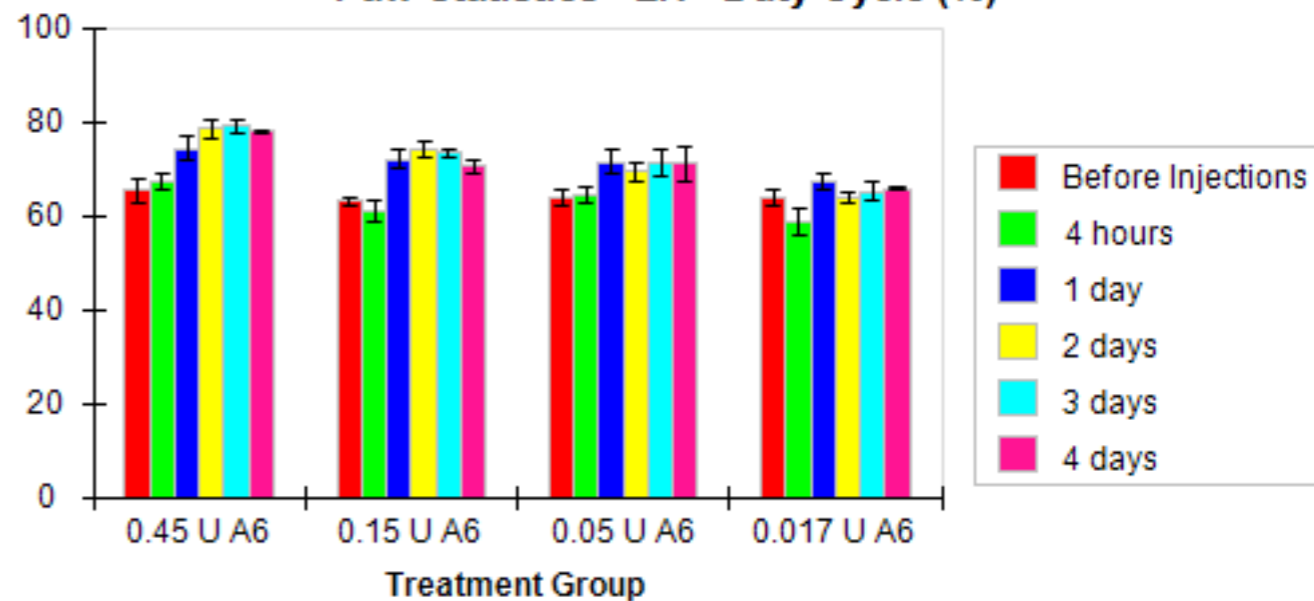

**Paw Statistics - RF - Toe Spread (cm)**

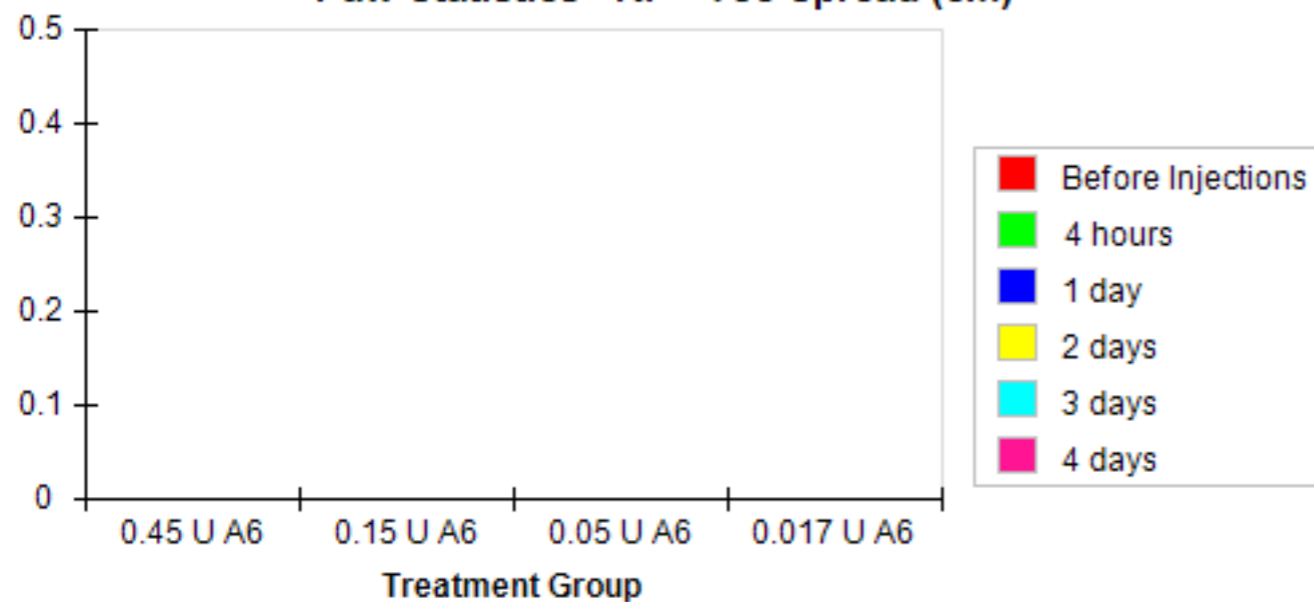

**Paw Statistics - RH - Toe Spread (cm)**

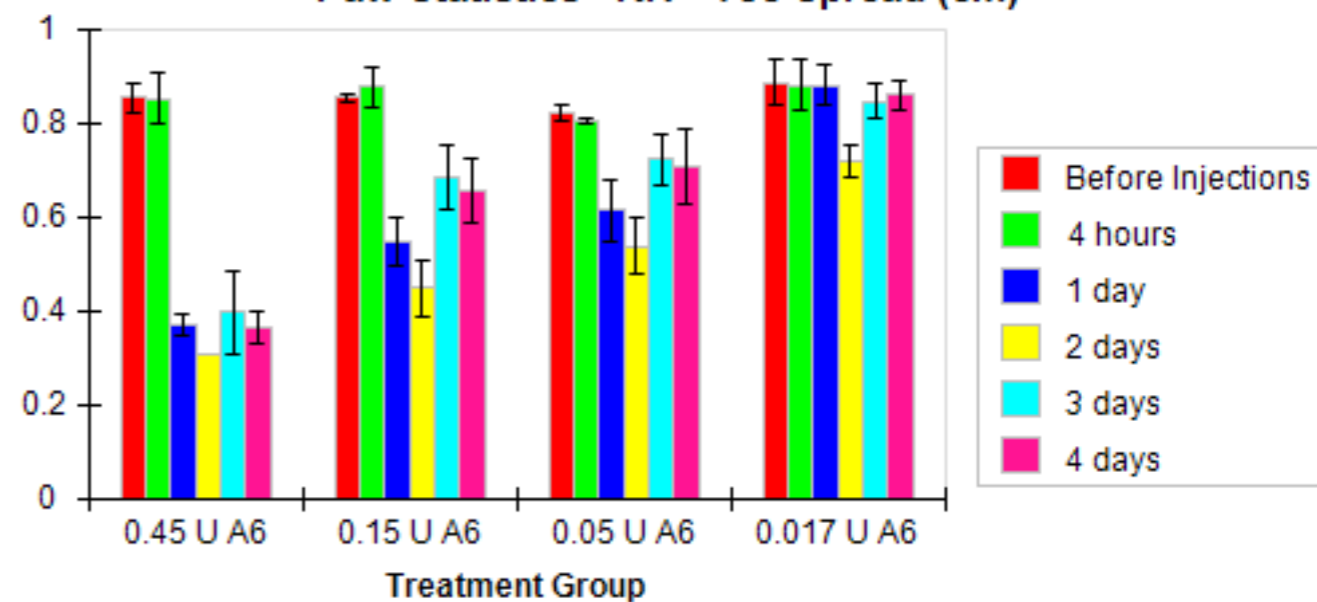

**Paw Statistics - LF - Toe Spread (cm)**

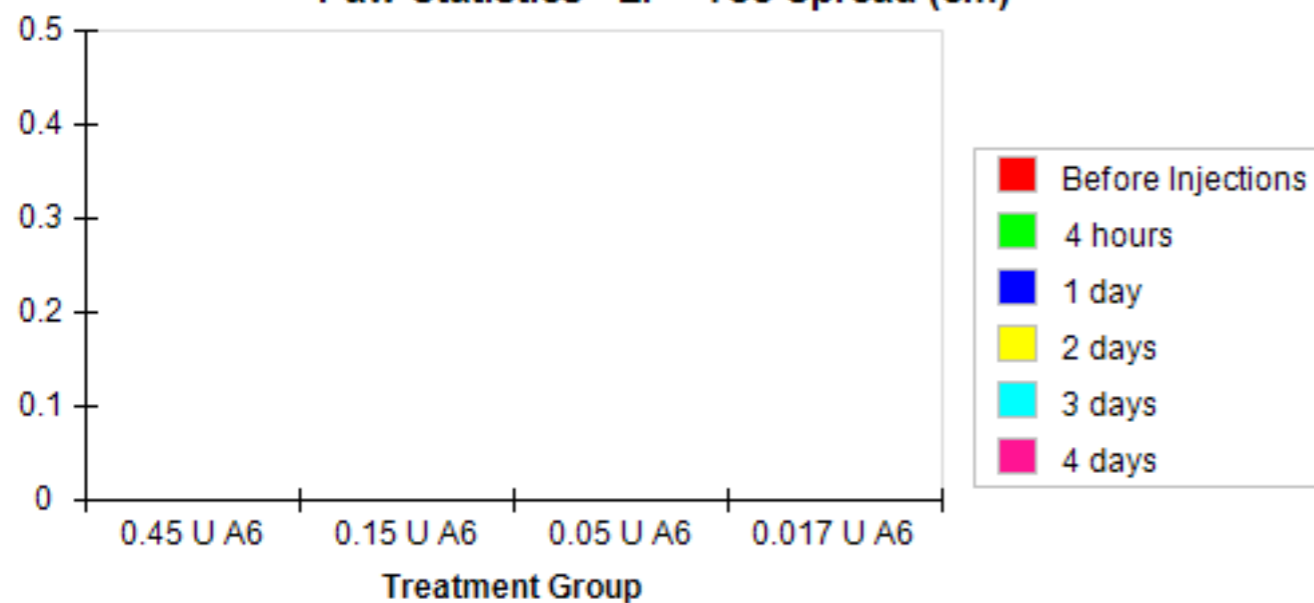

**Paw Statistics - LH - Toe Spread (cm)**

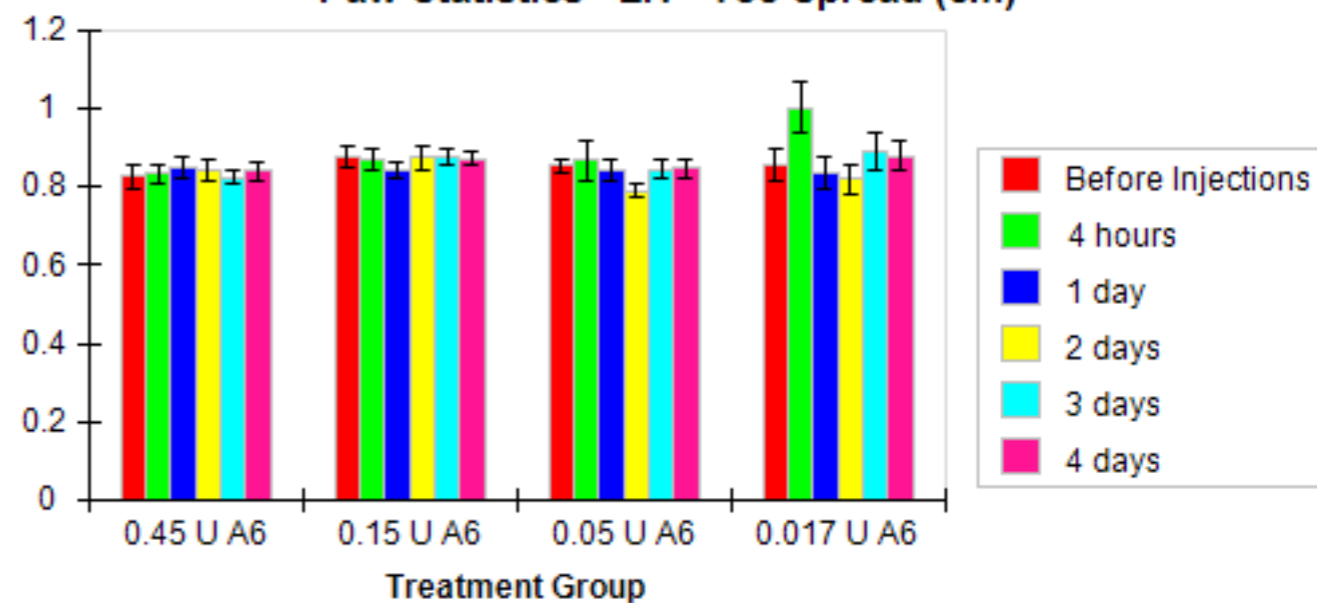

**Paw Statistics - RF - Intermediate Toe Spread**

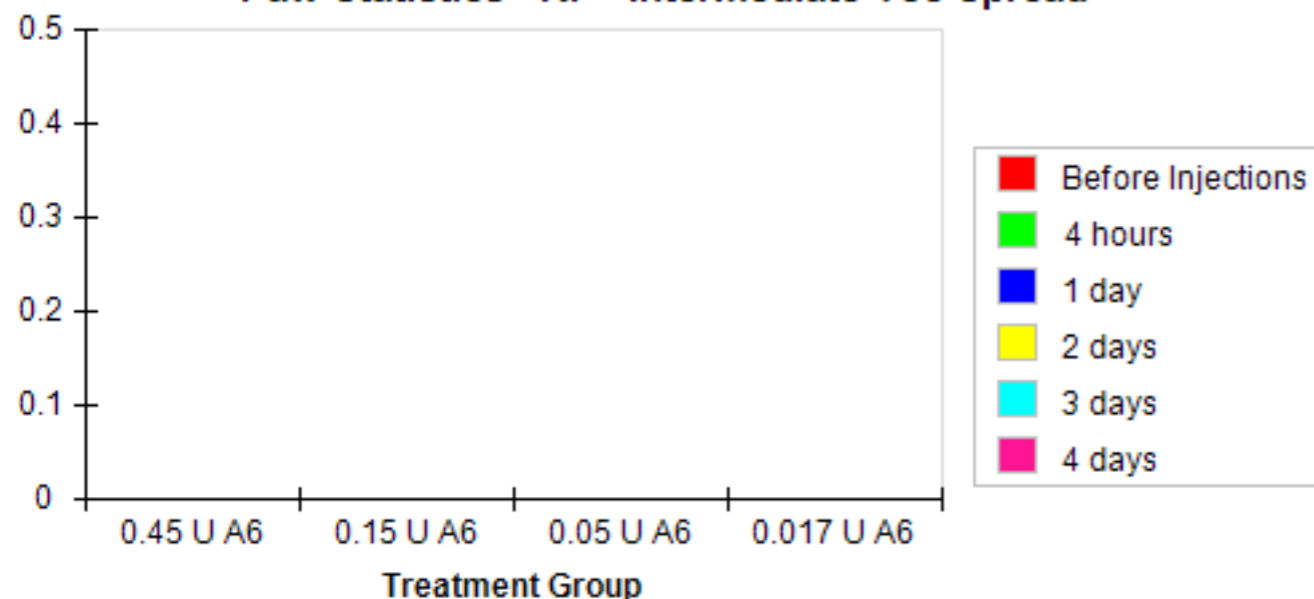

**Paw Statistics - RH - Intermediate Toe Spread**

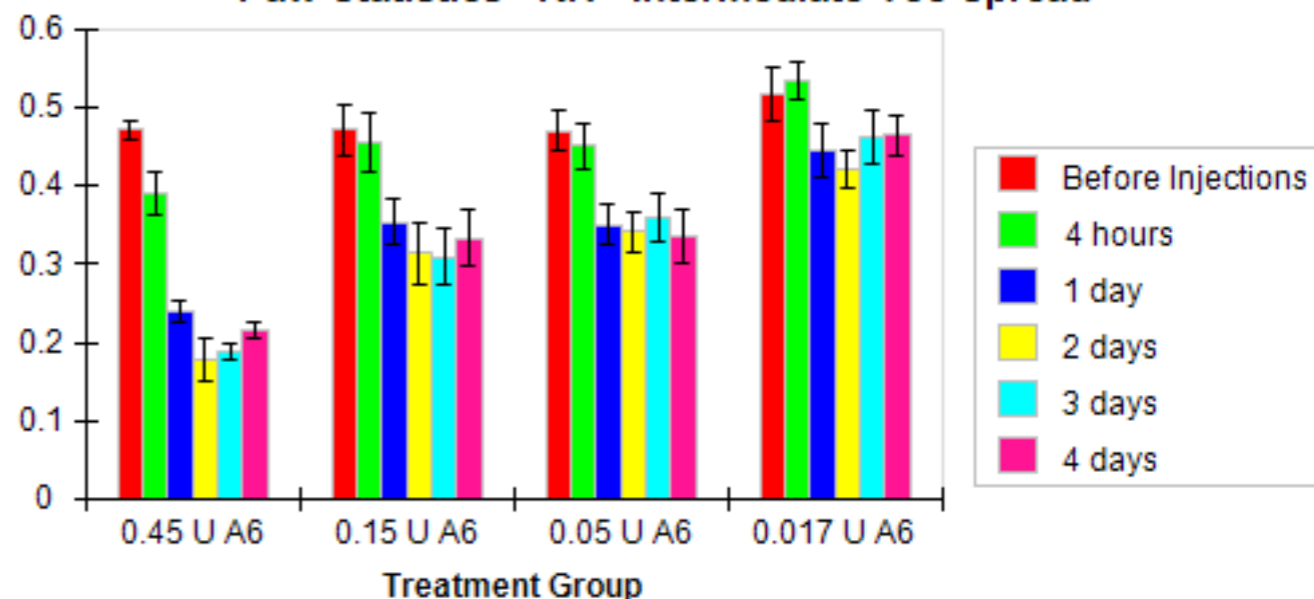

**Paw Statistics - LF - Intermediate Toe Spread**

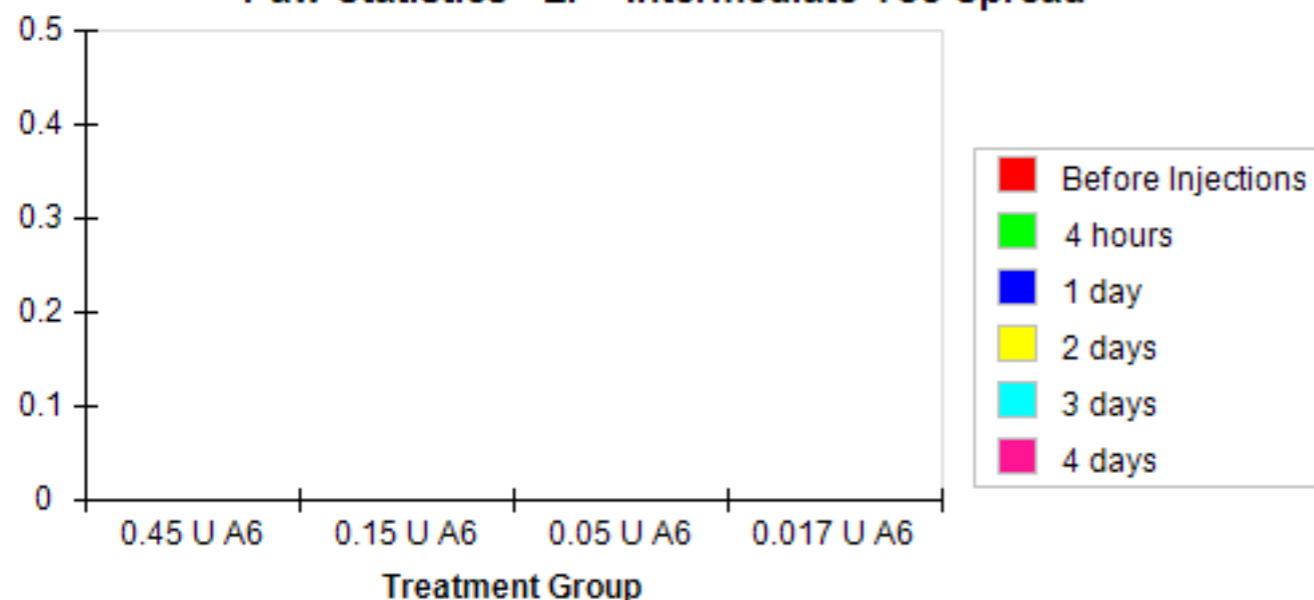

**Paw Statistics - LH - Intermediate Toe Spread**

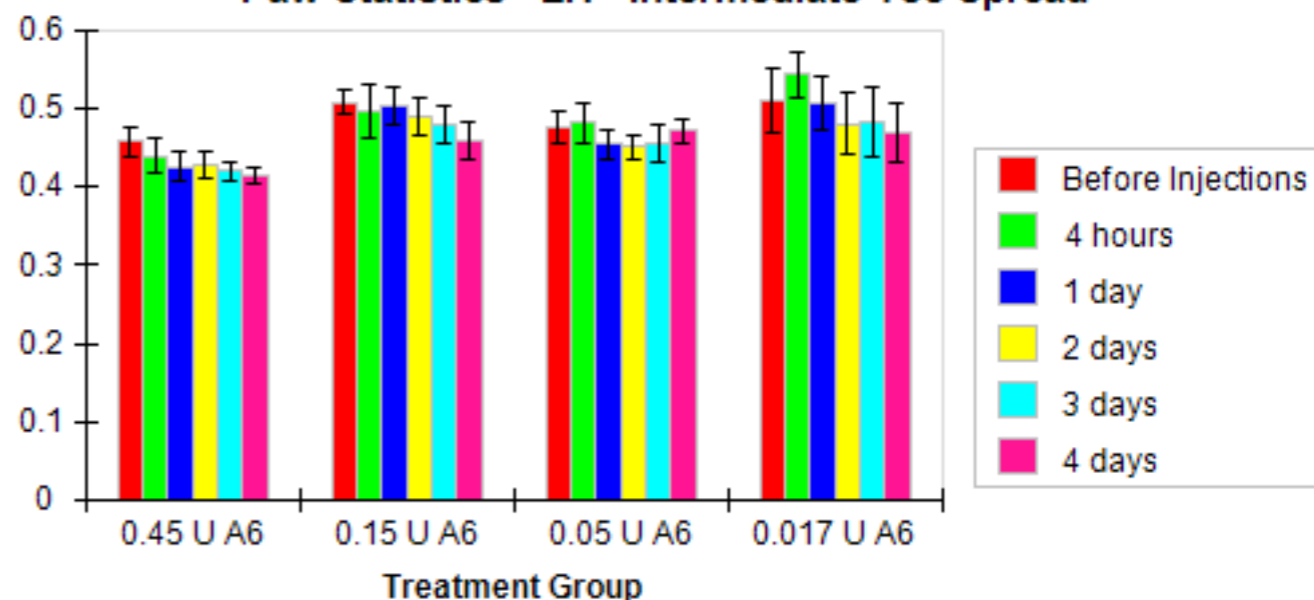

**Paw Statistics - RF - Manual Print Length**

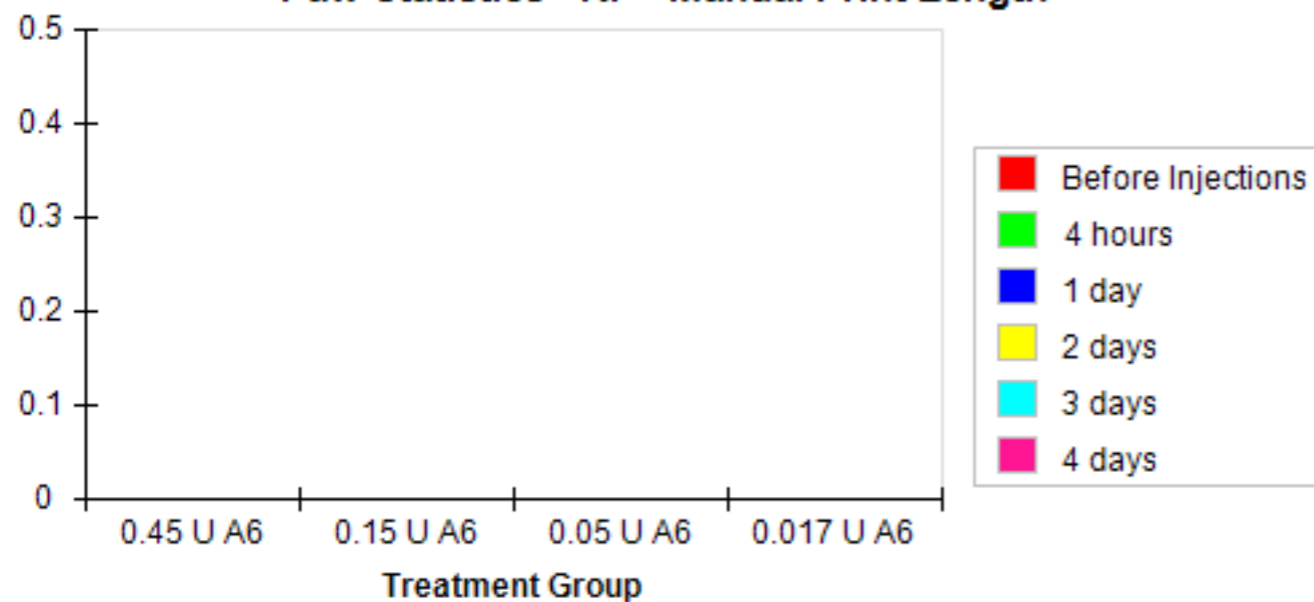

**Paw Statistics - RH - Manual Print Length**

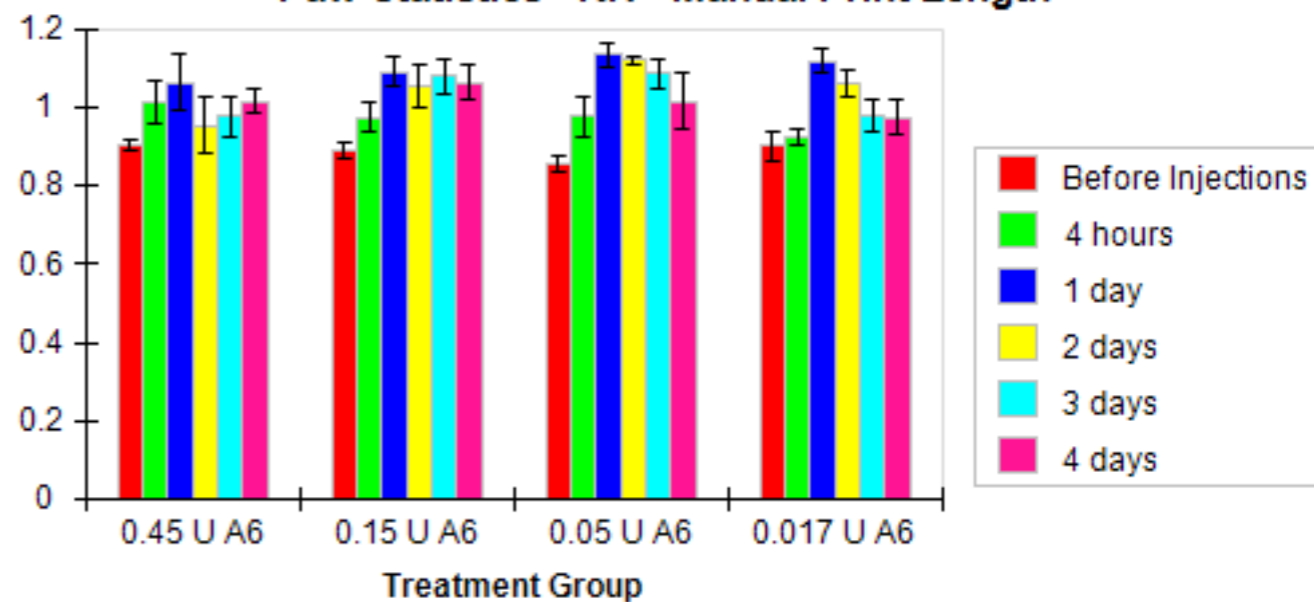

**Paw Statistics - LF - Manual Print Length**

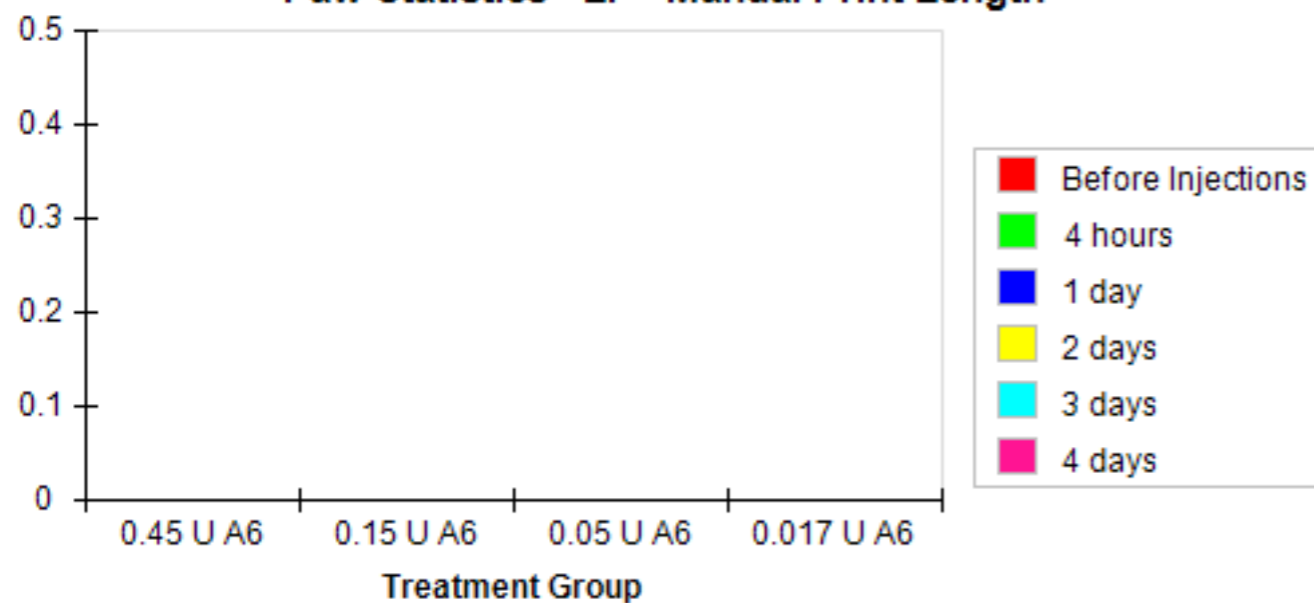

**Paw Statistics - LH - Manual Print Length**

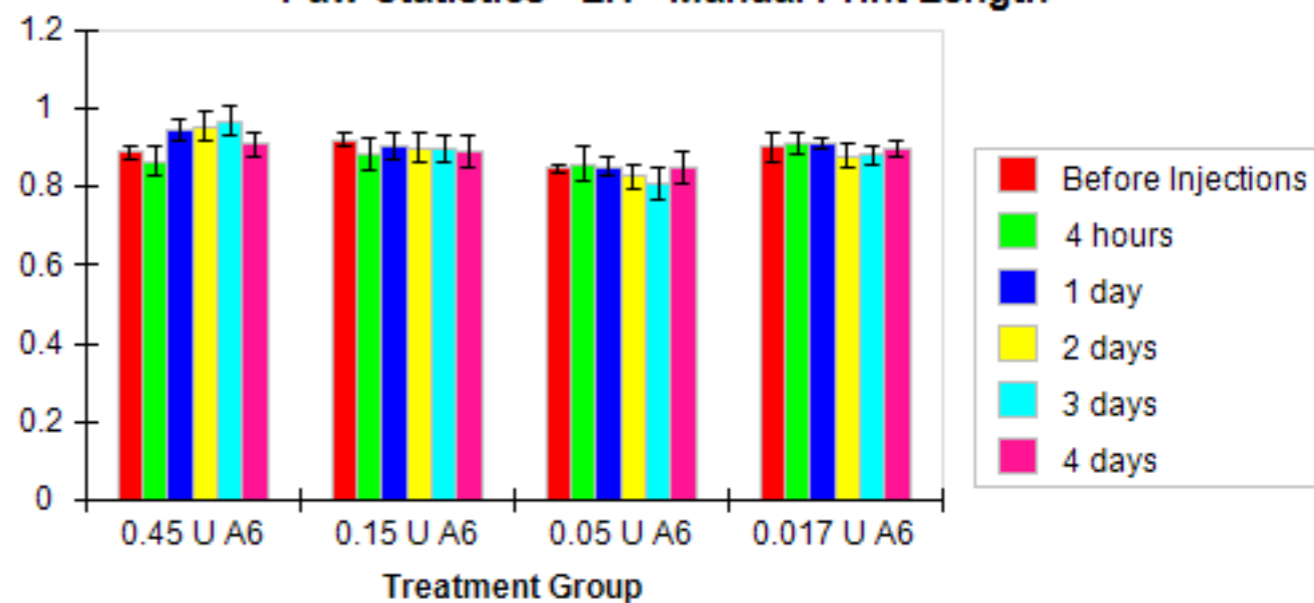

**Paw Statistics - RF - Paw Angle Body Axis**

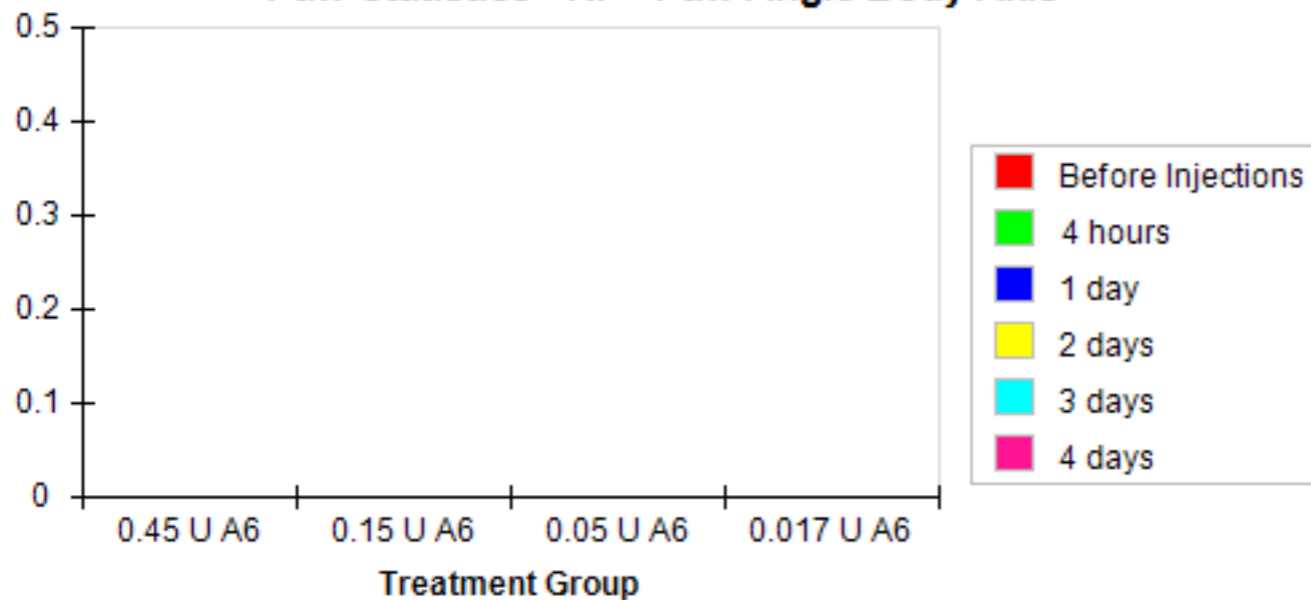

**Paw Statistics - RH - Paw Angle Body Axis**

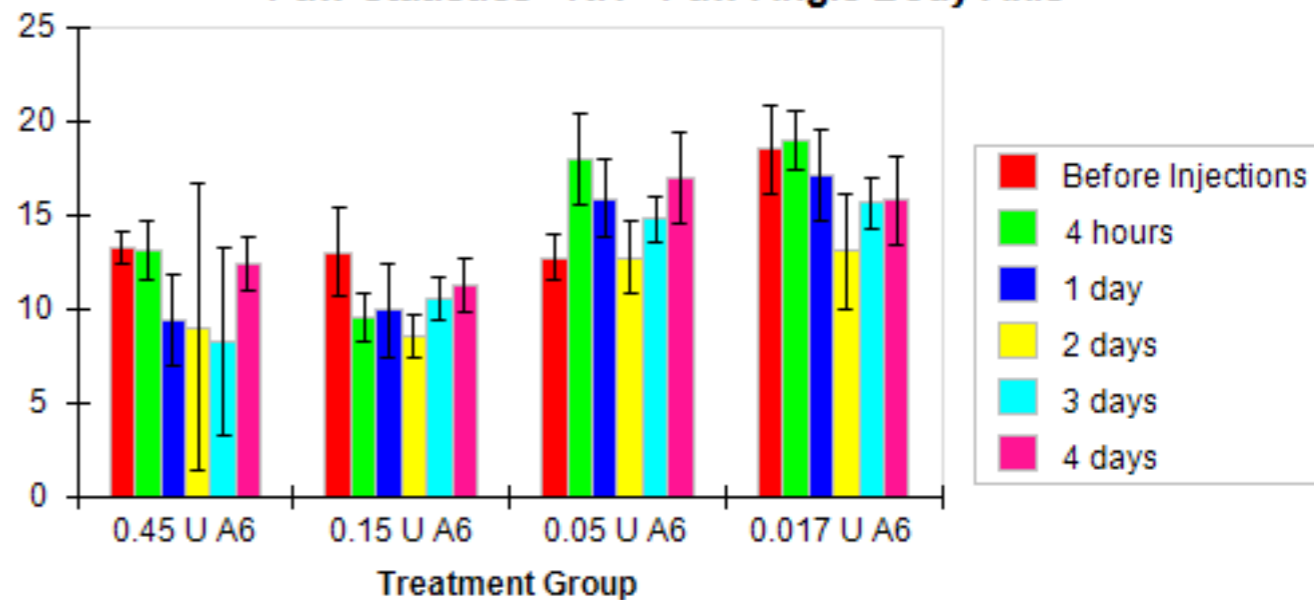

**Paw Statistics - LF - Paw Angle Body Axis**

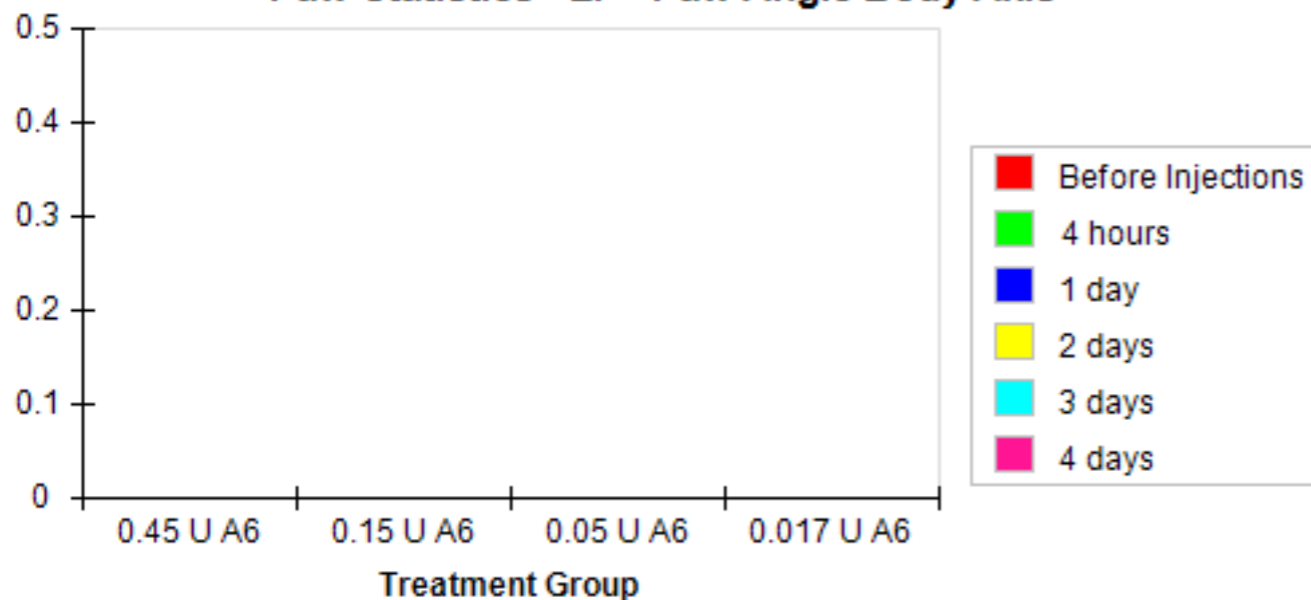

**Paw Statistics - LH - Paw Angle Body Axis**

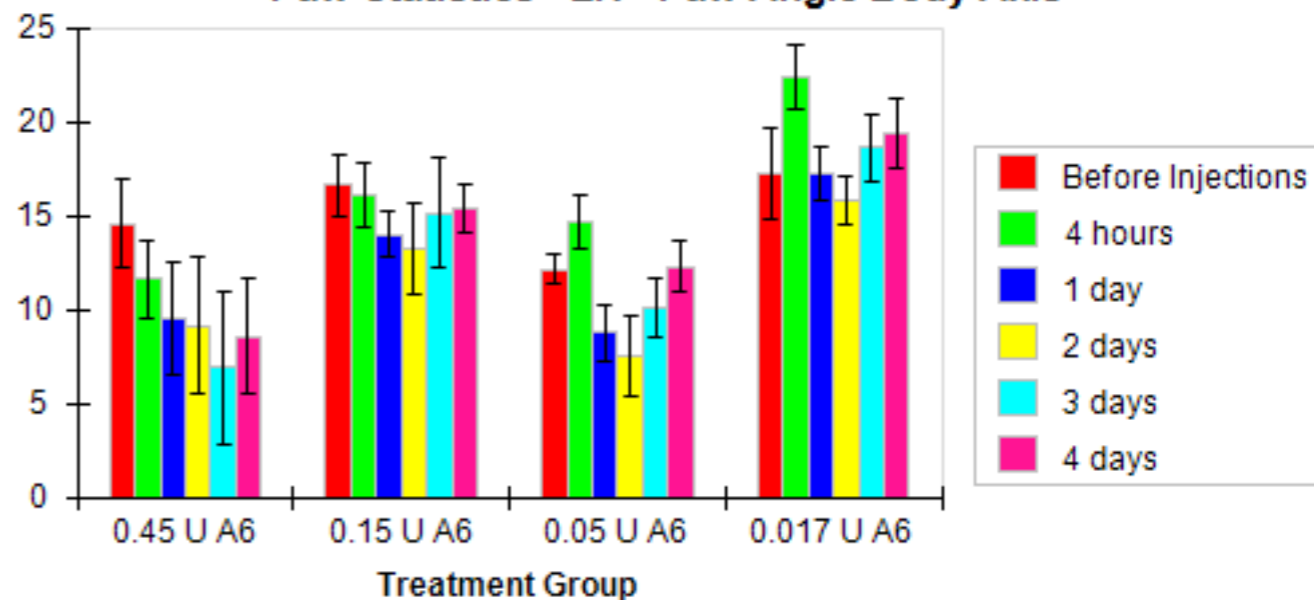

**Paw Statistics - RF - Paw Angle Movement Vector**

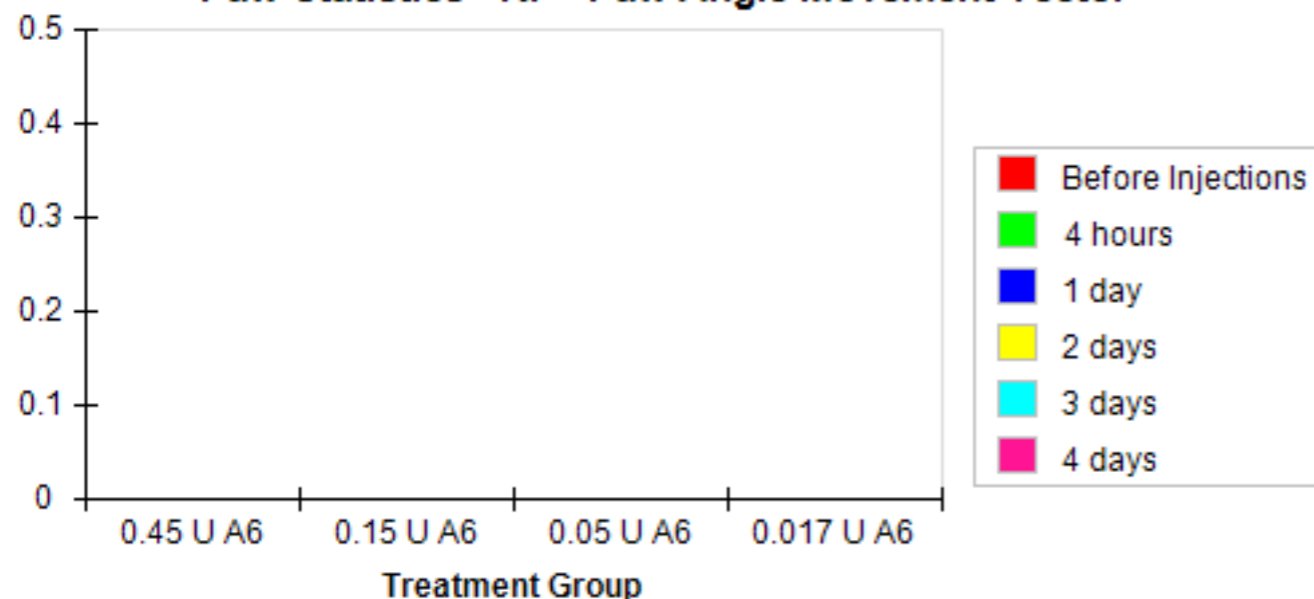

**Paw Statistics - RH - Paw Angle Movement Vector**

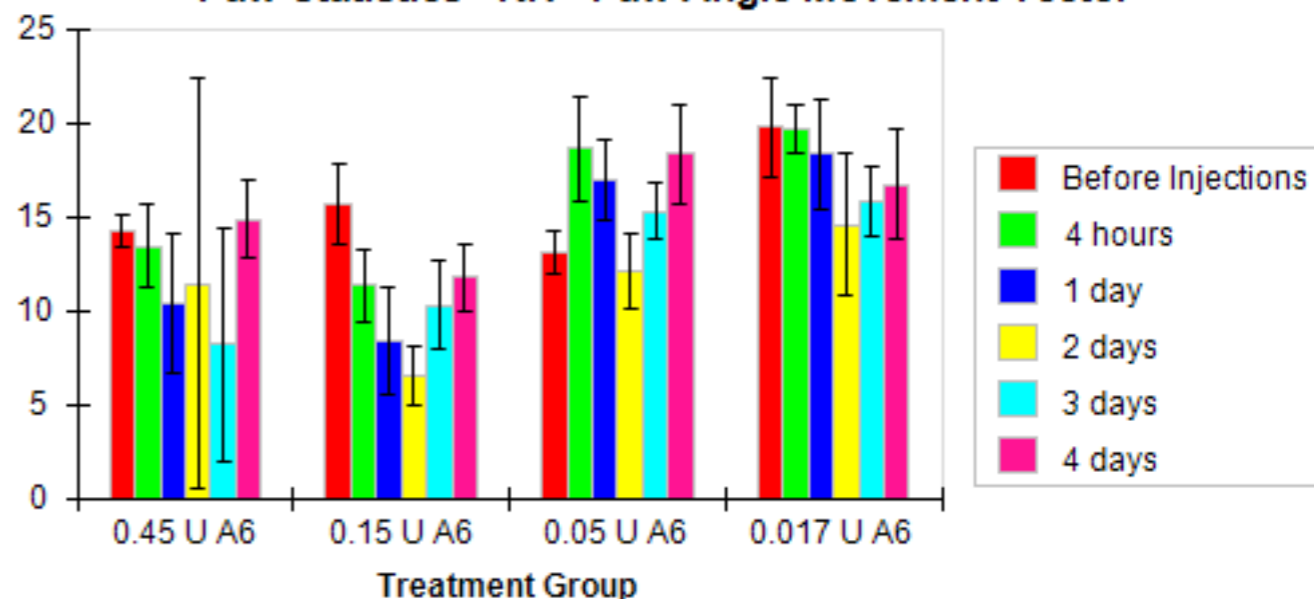

**Paw Statistics - LF - Paw Angle Movement Vector**

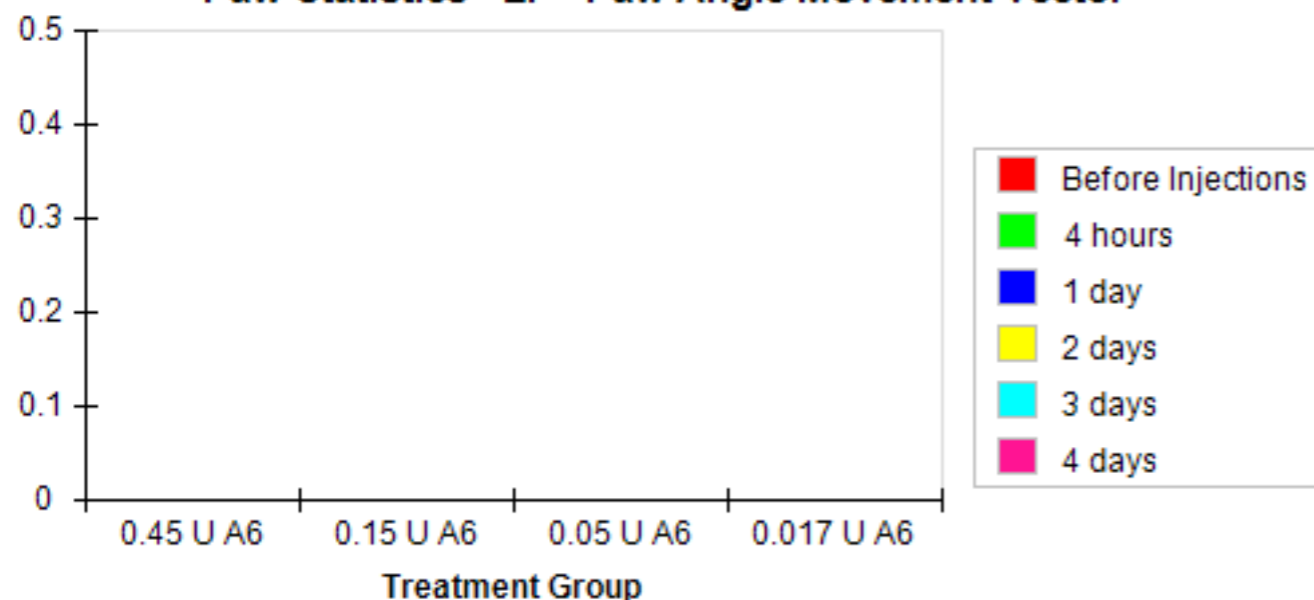

**Paw Statistics - LH - Paw Angle Movement Vector**

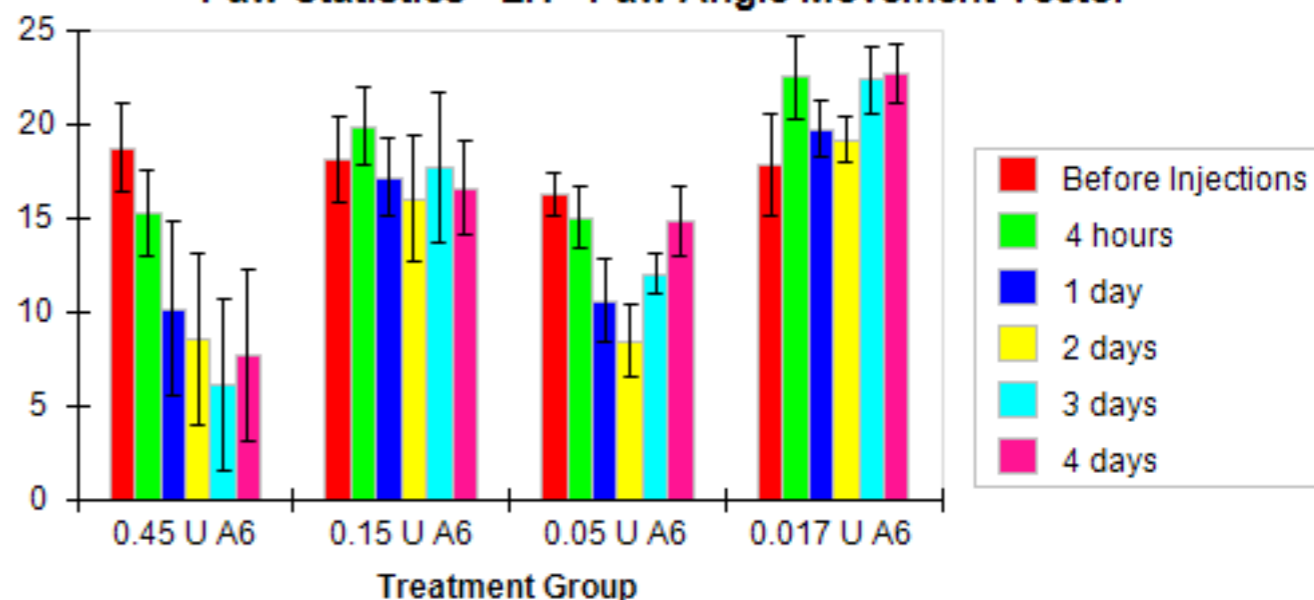



**Paw Statistics - RF - Single Stance**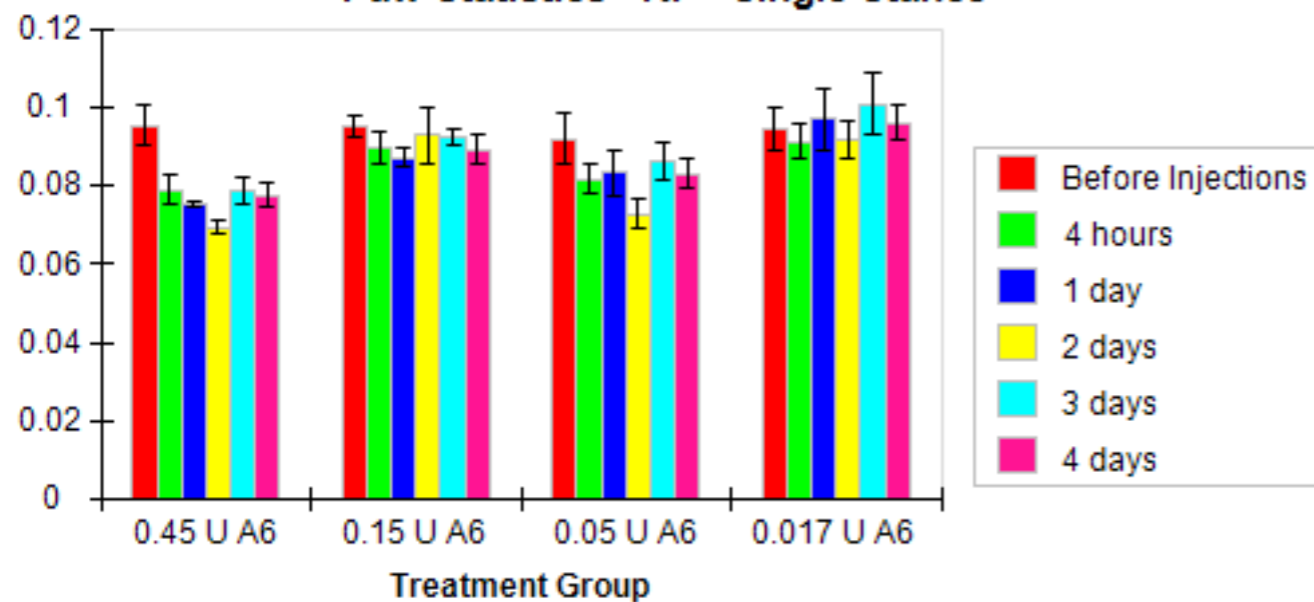**Paw Statistics - RH - Single Stance**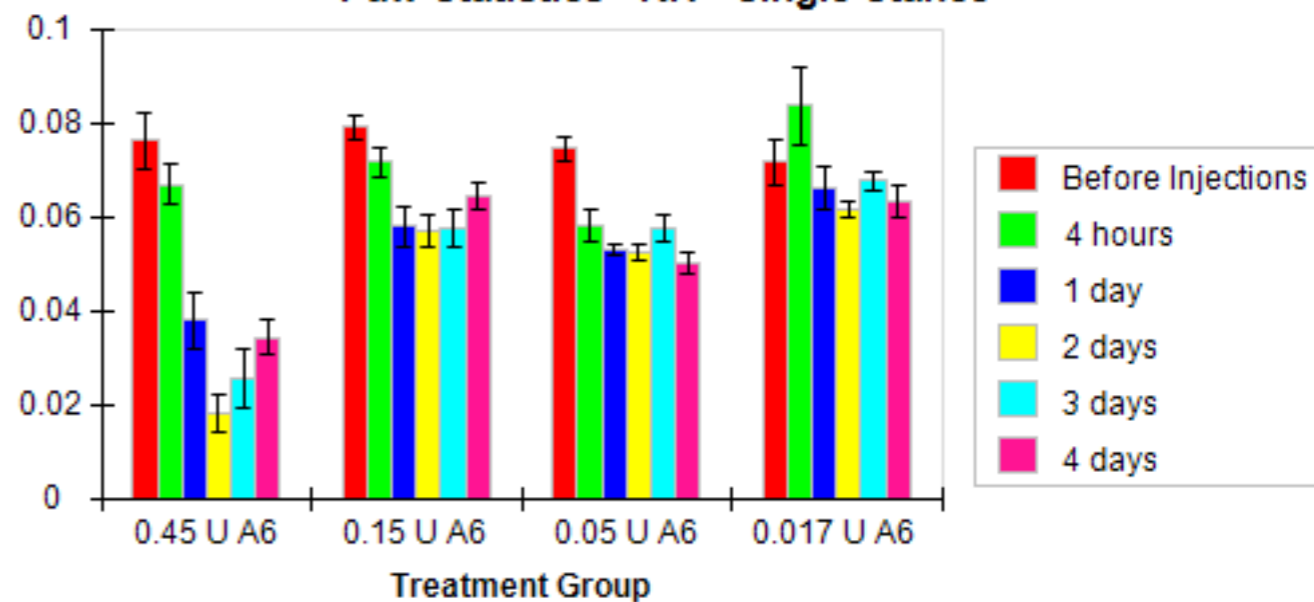**Paw Statistics - LF - Single Stance**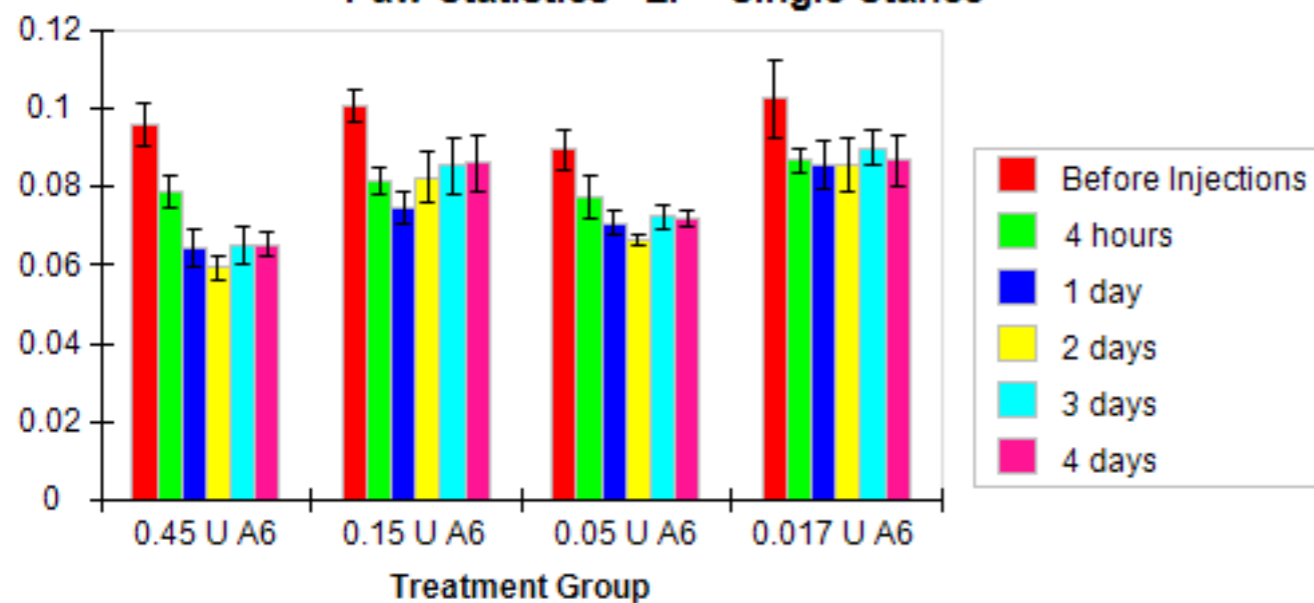**Paw Statistics - LH - Single Stance**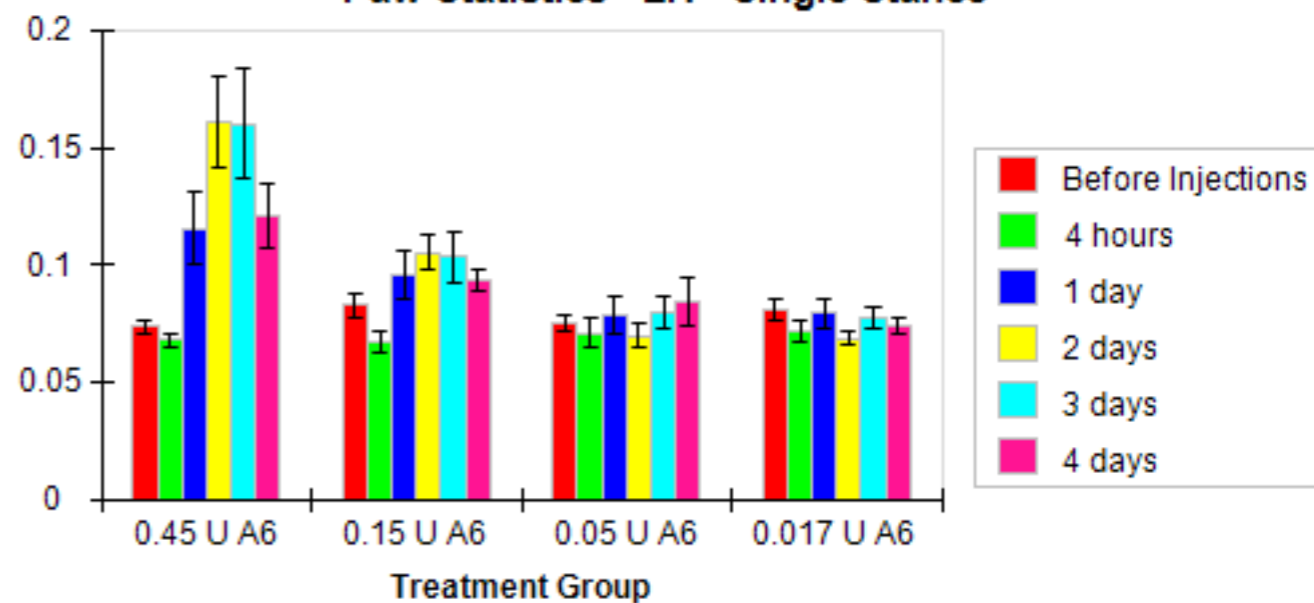

**Paw Statistics - RF - Initial Dual Stance**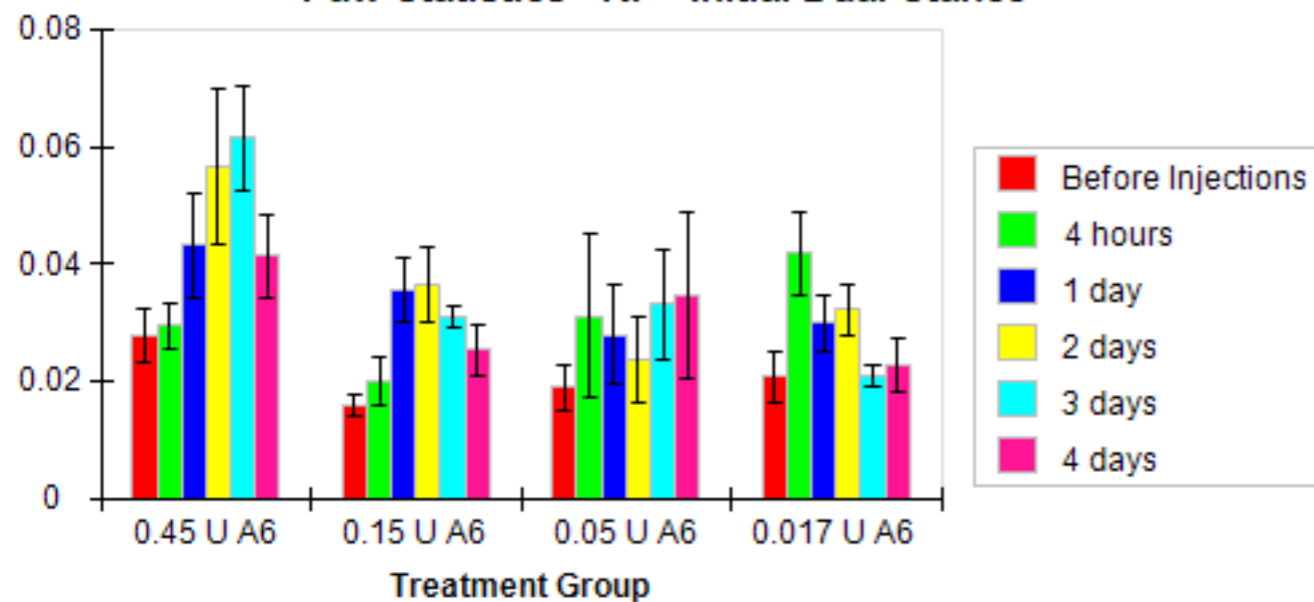**Paw Statistics - RH - Initial Dual Stance**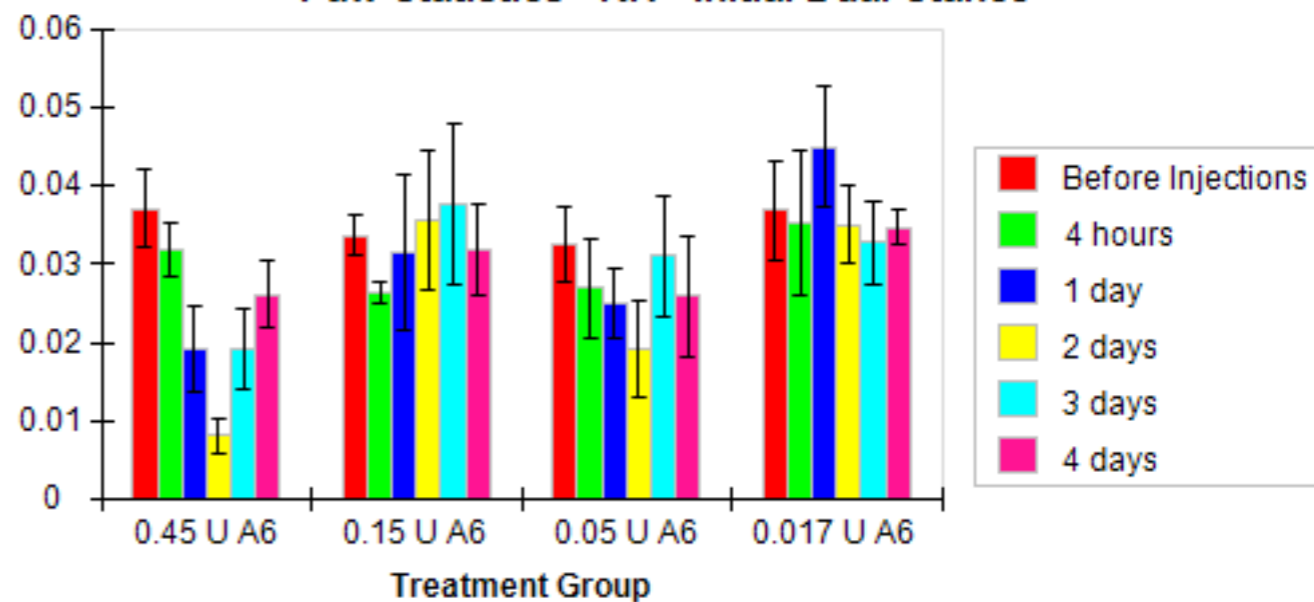**Paw Statistics - LF - Initial Dual Stance**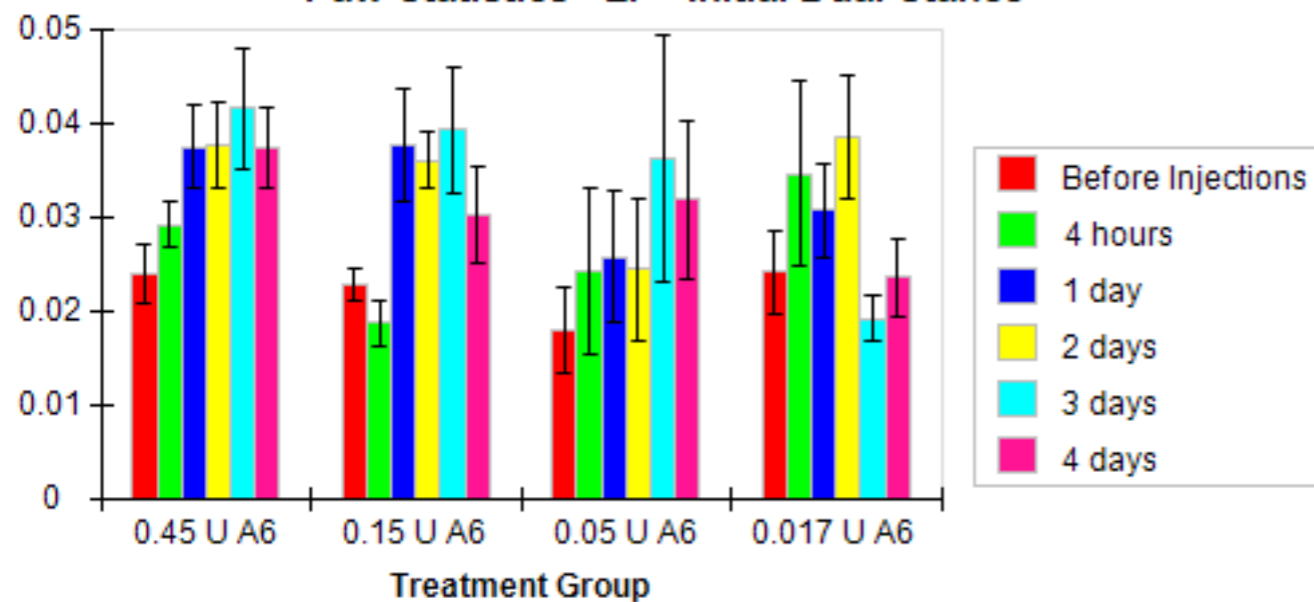**Paw Statistics - LH - Initial Dual Stance**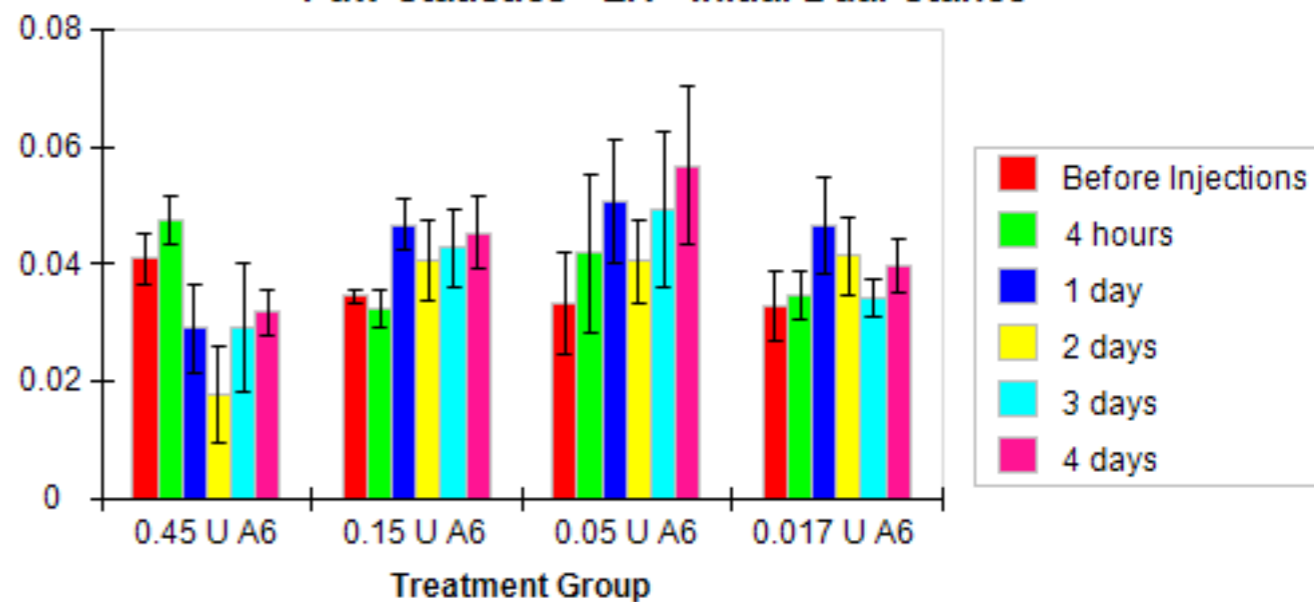

**Paw Statistics - RF - Terminal Dual Stance**

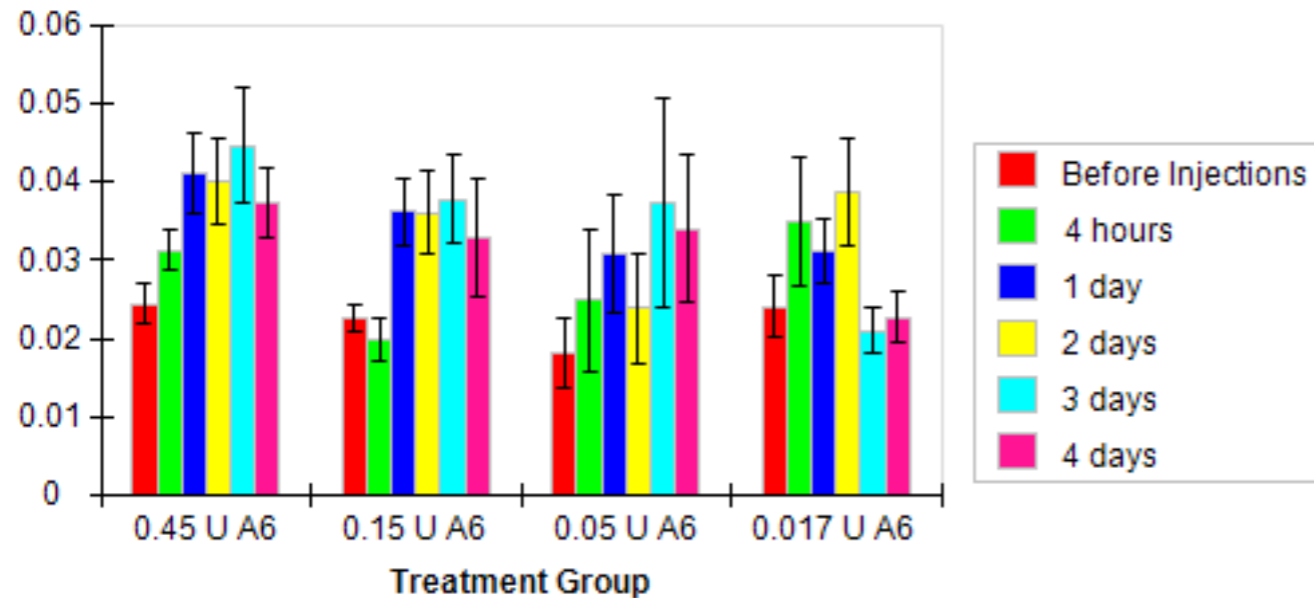

**Paw Statistics - RH - Terminal Dual Stance**

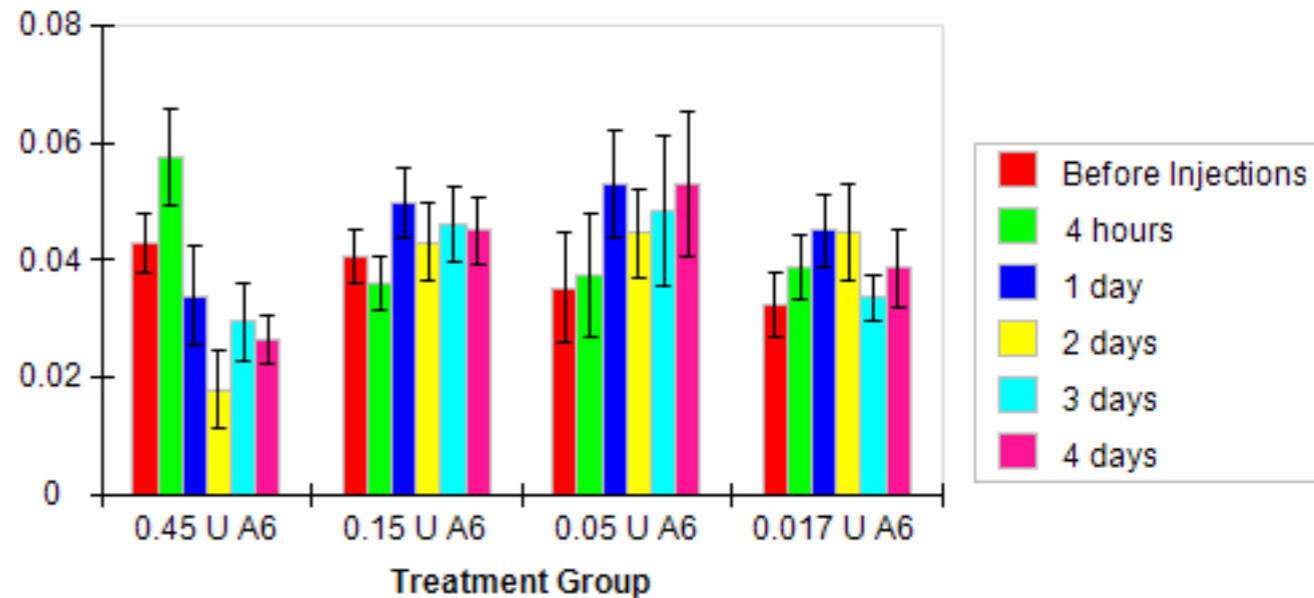

**Paw Statistics - LF - Terminal Dual Stance**

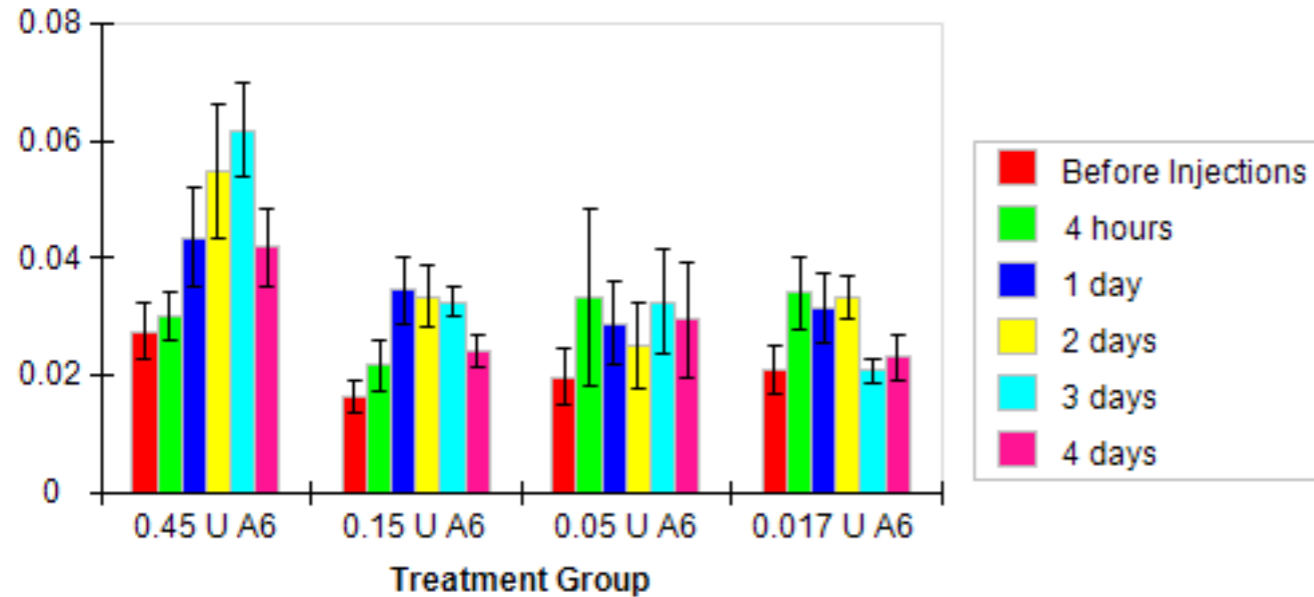

**Paw Statistics - LH - Terminal Dual Stance**

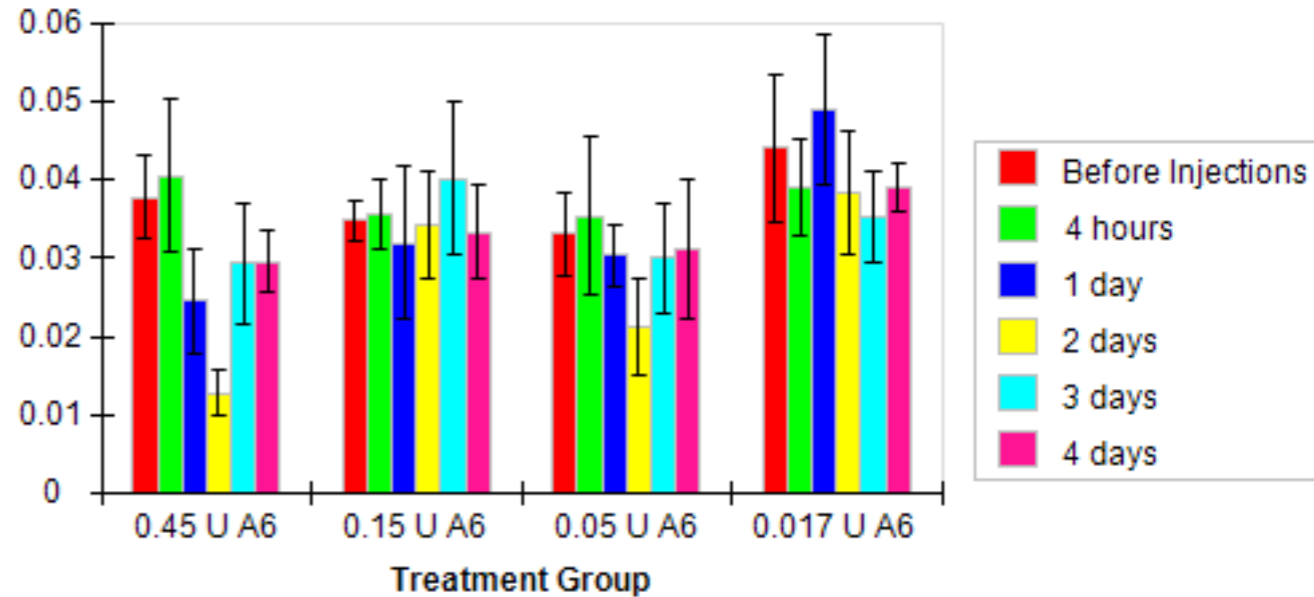

**Paw Statistics - RF - Body Speed**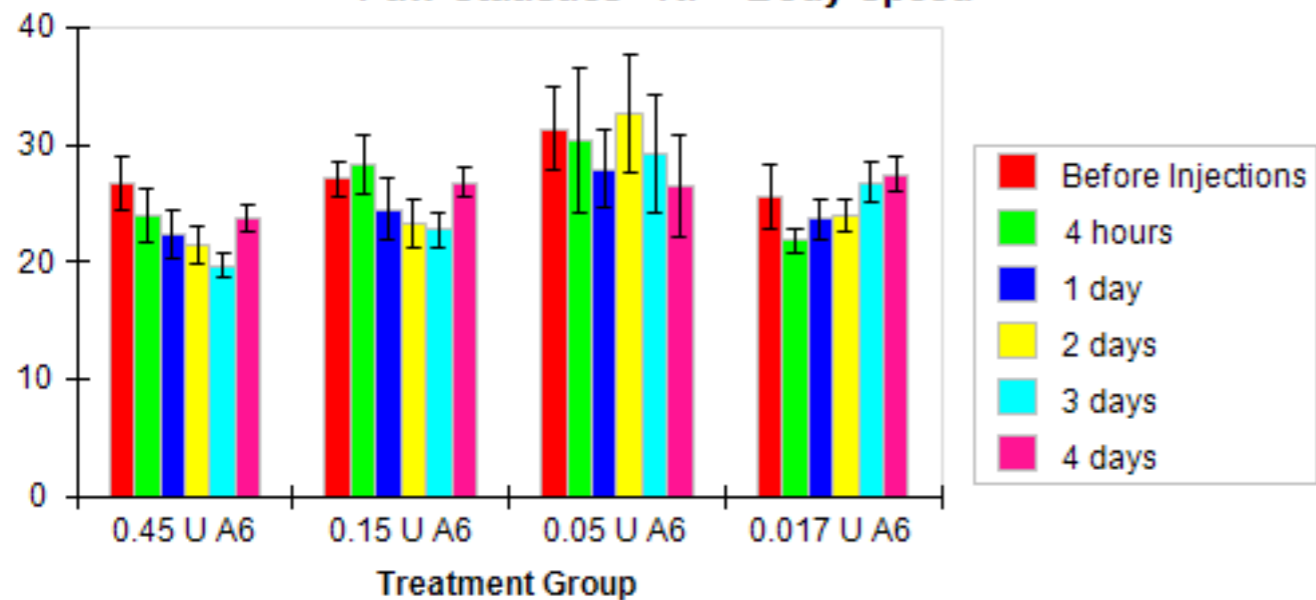**Paw Statistics - RH - Body Speed**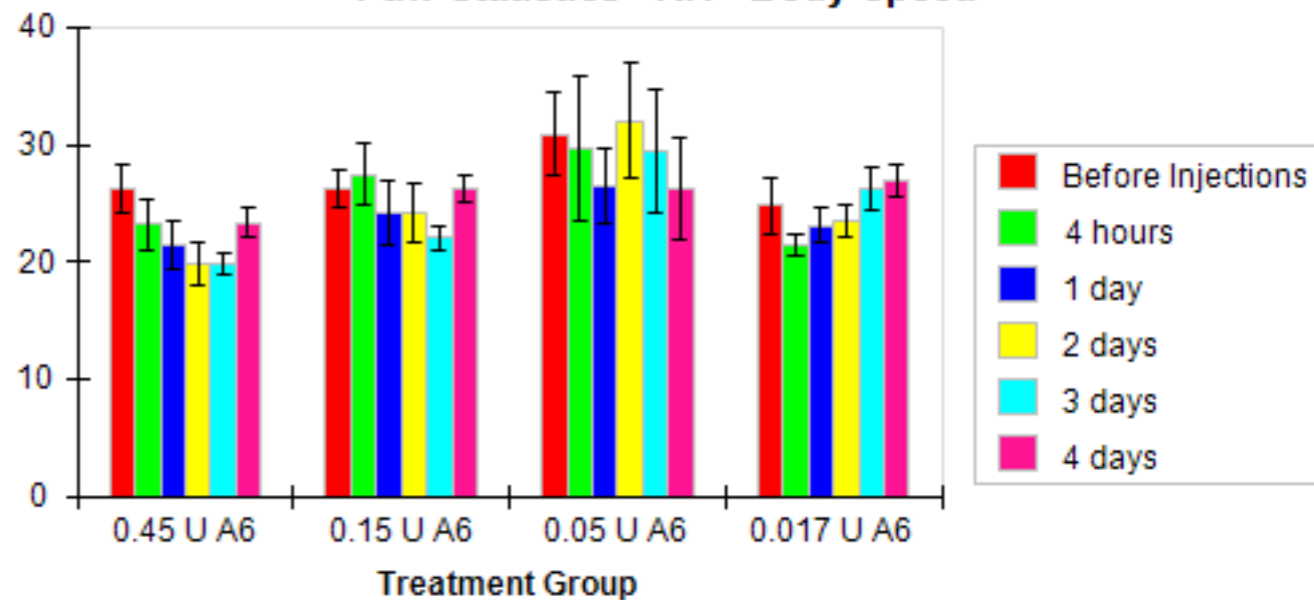**Paw Statistics - LF - Body Speed**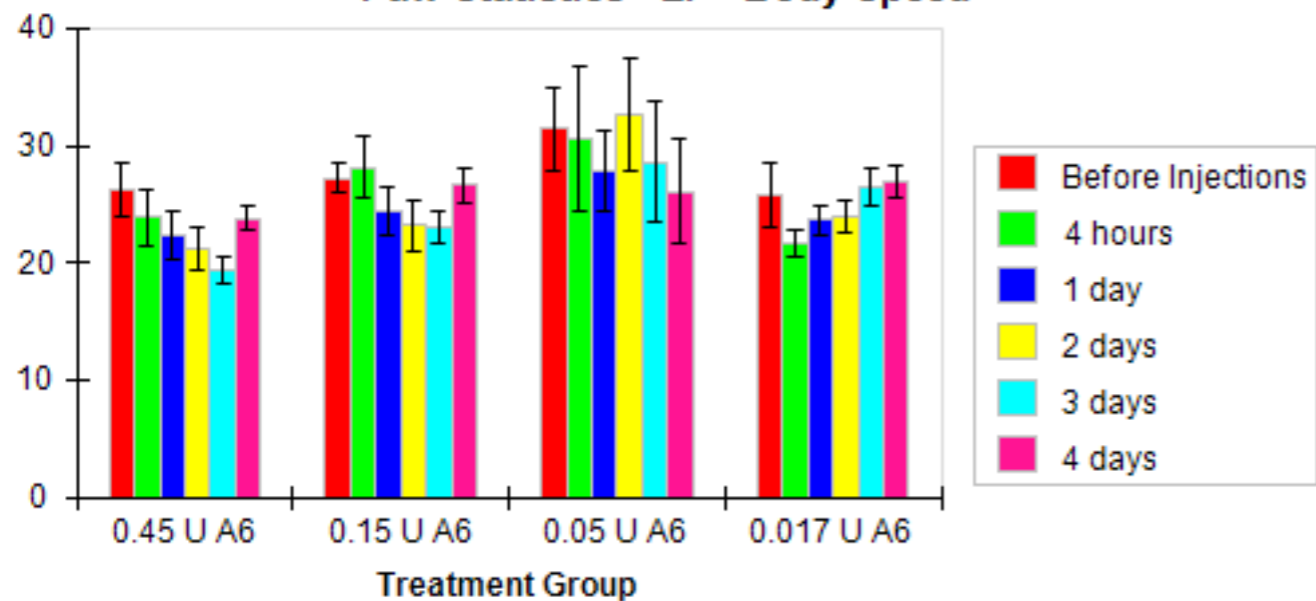**Paw Statistics - LH - Body Speed**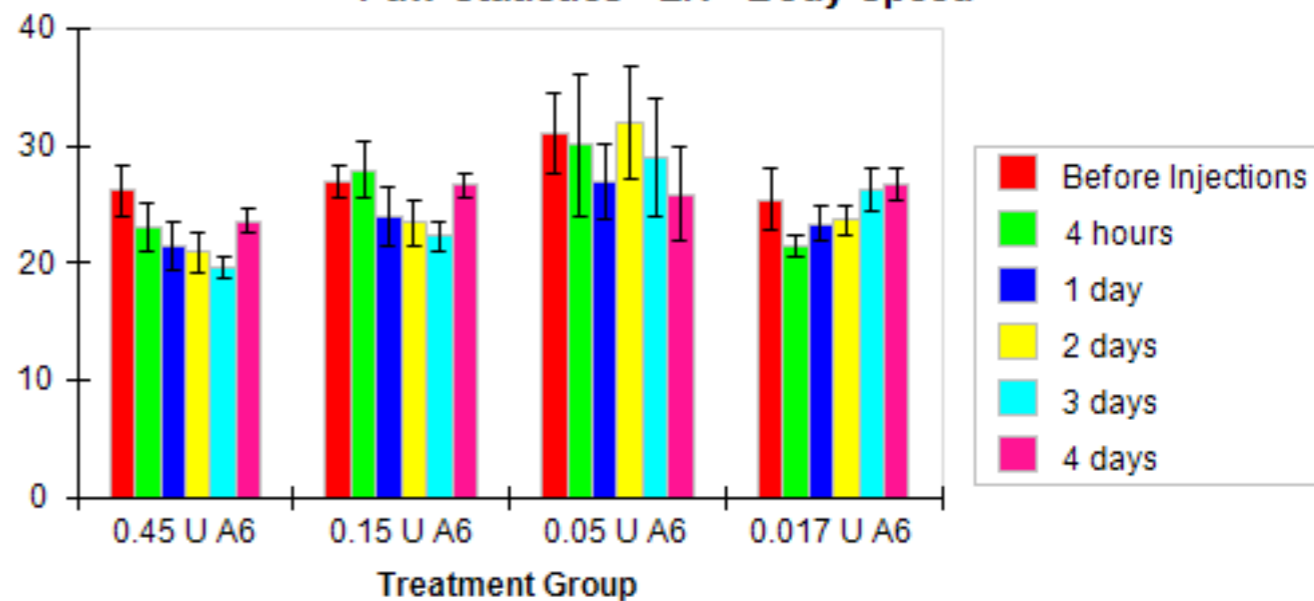

**Paw Statistics - RF - Body Speed Variation**

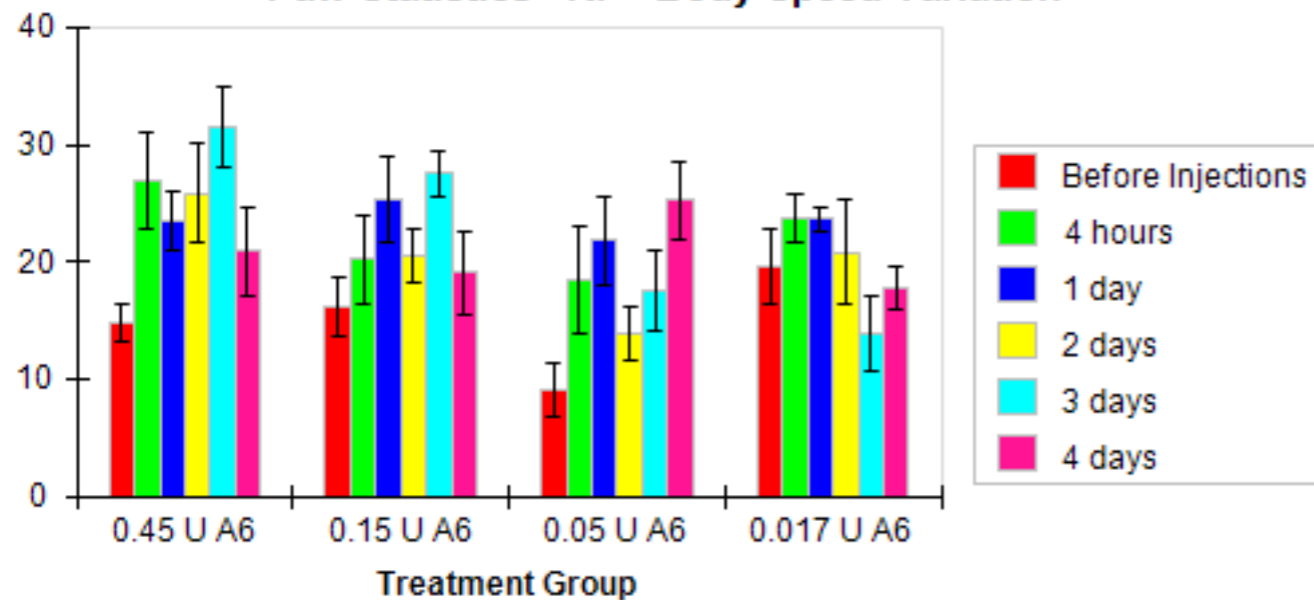

**Paw Statistics - RH - Body Speed Variation**

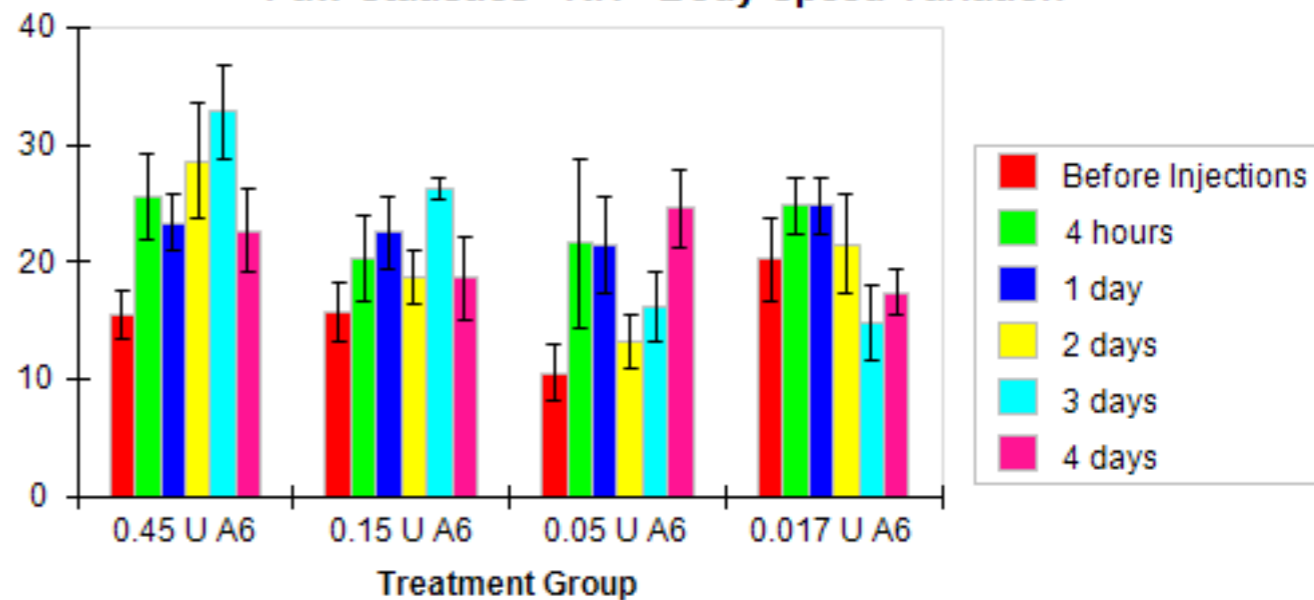

**Paw Statistics - LF - Body Speed Variation**

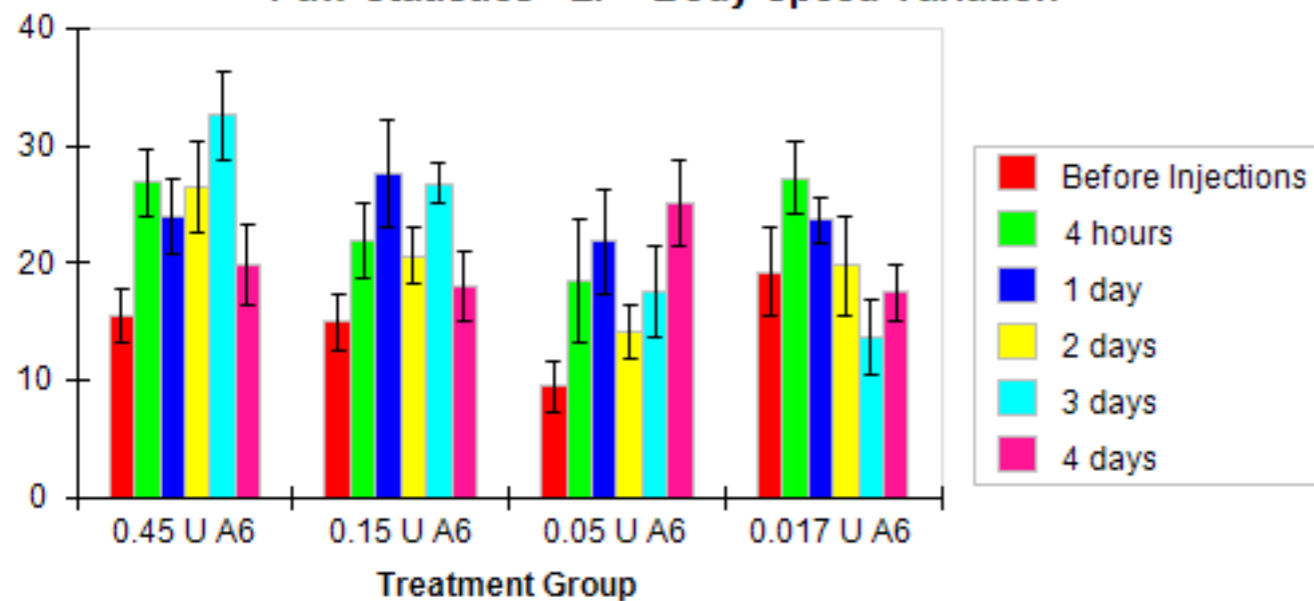

**Paw Statistics - LH - Body Speed Variation**

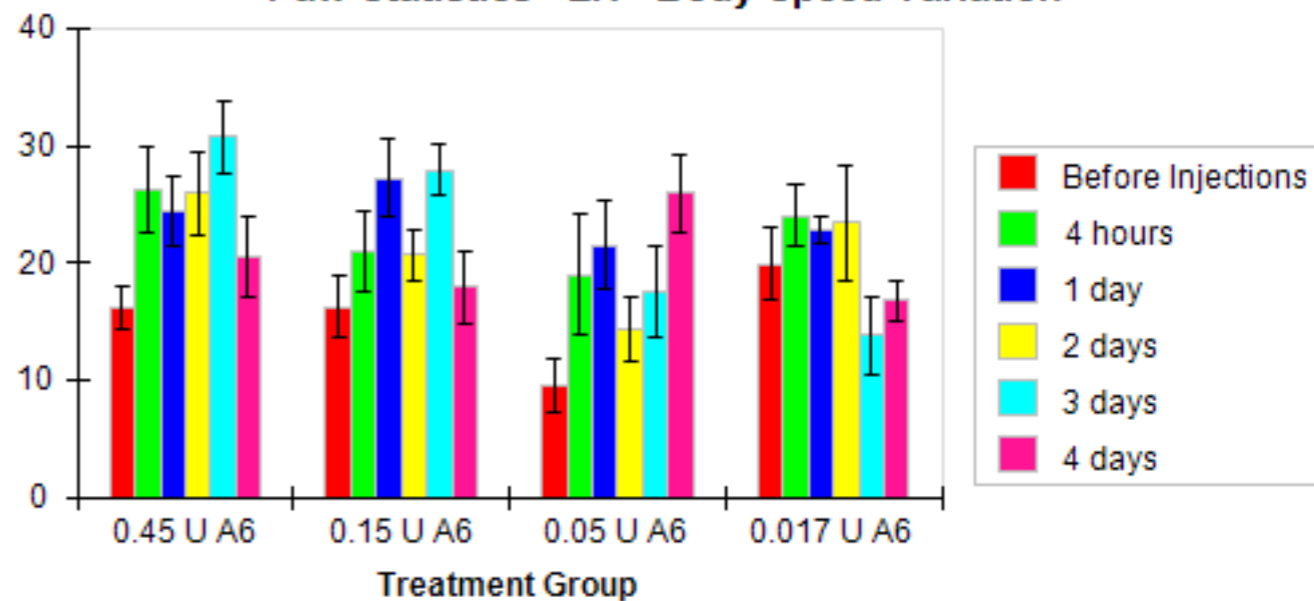

**Step Sequence - Regularity Index (%)**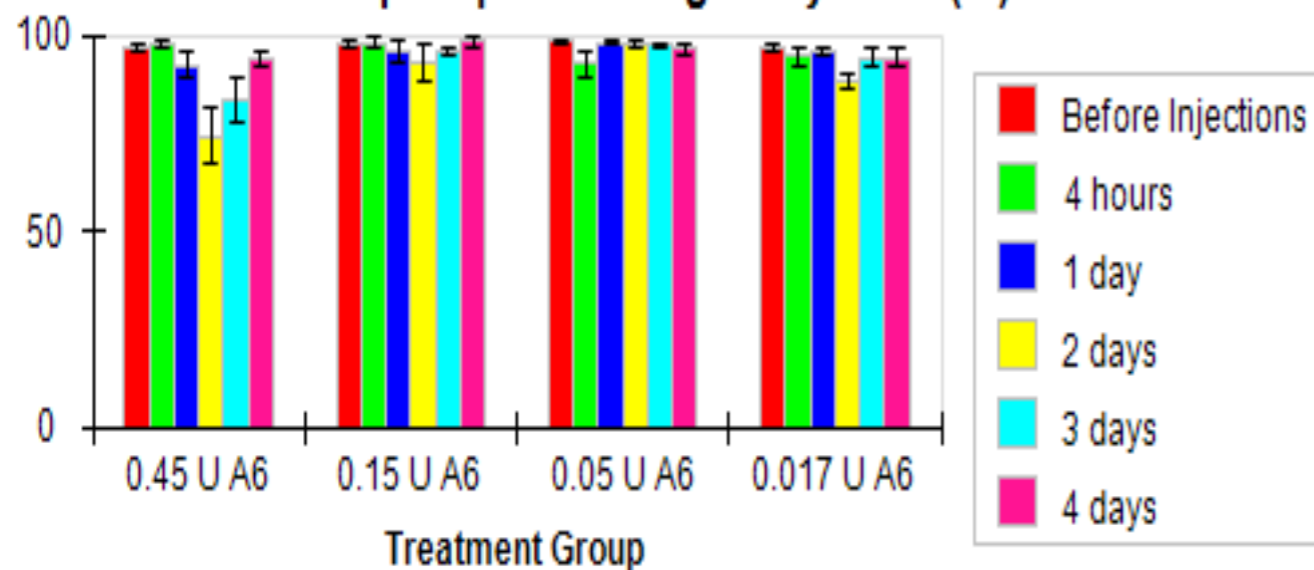**Base of Support - Front Paws (cm)**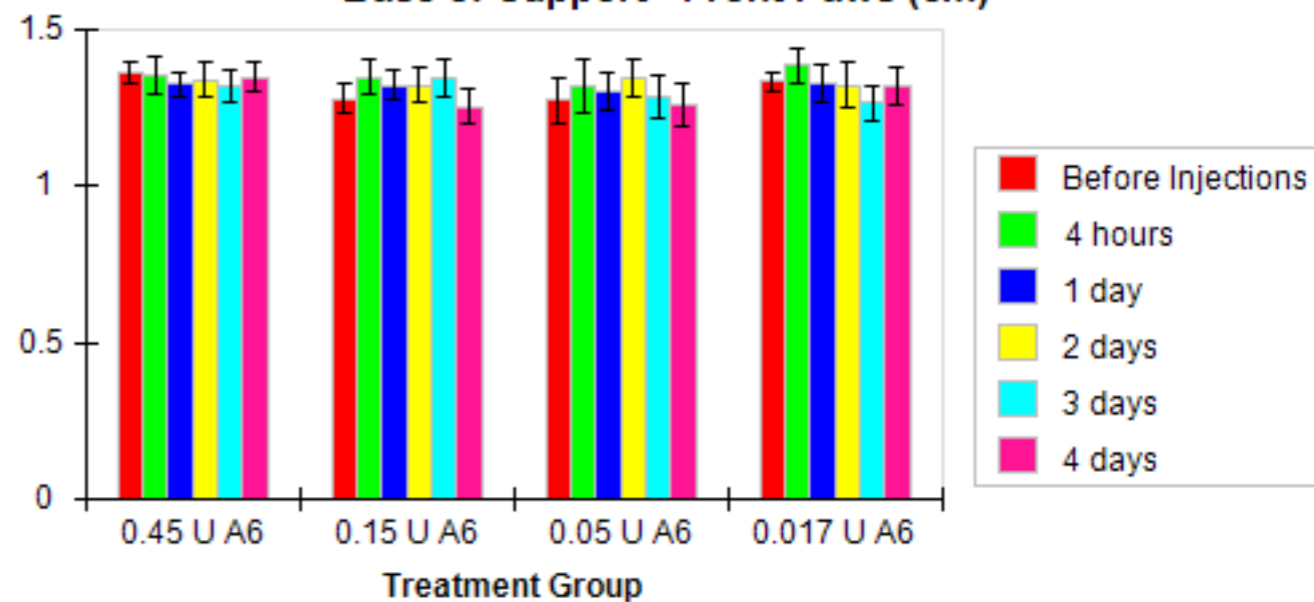**Base of Support - Hind Paws (cm)**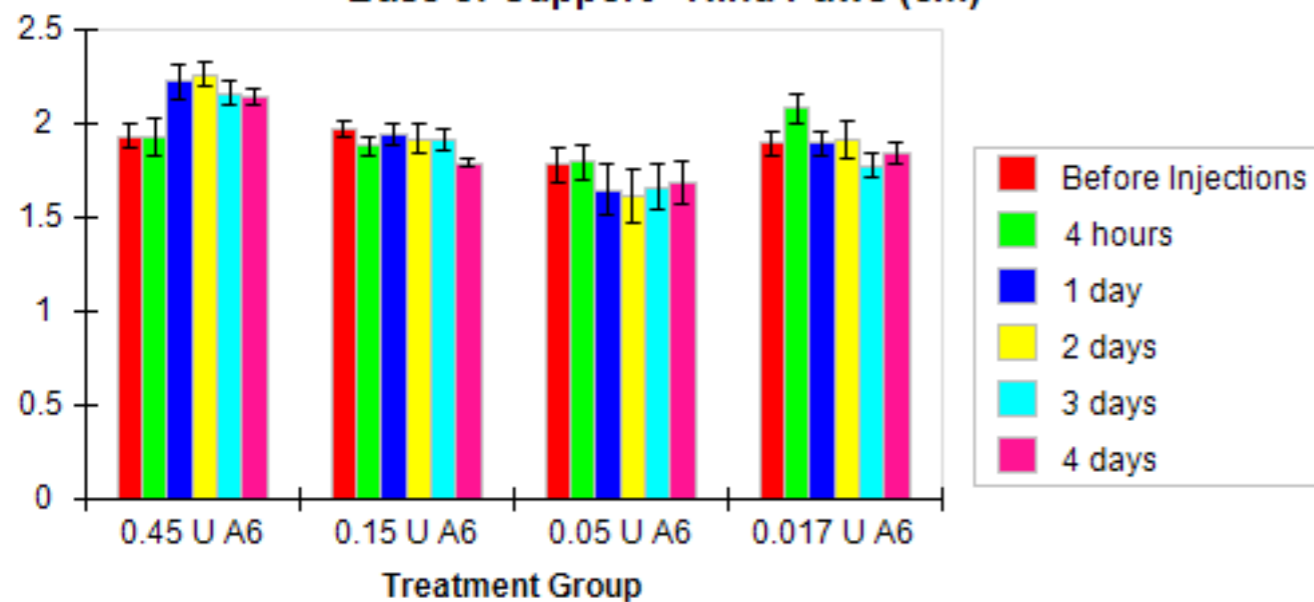**Other Statistics - Duration (s)**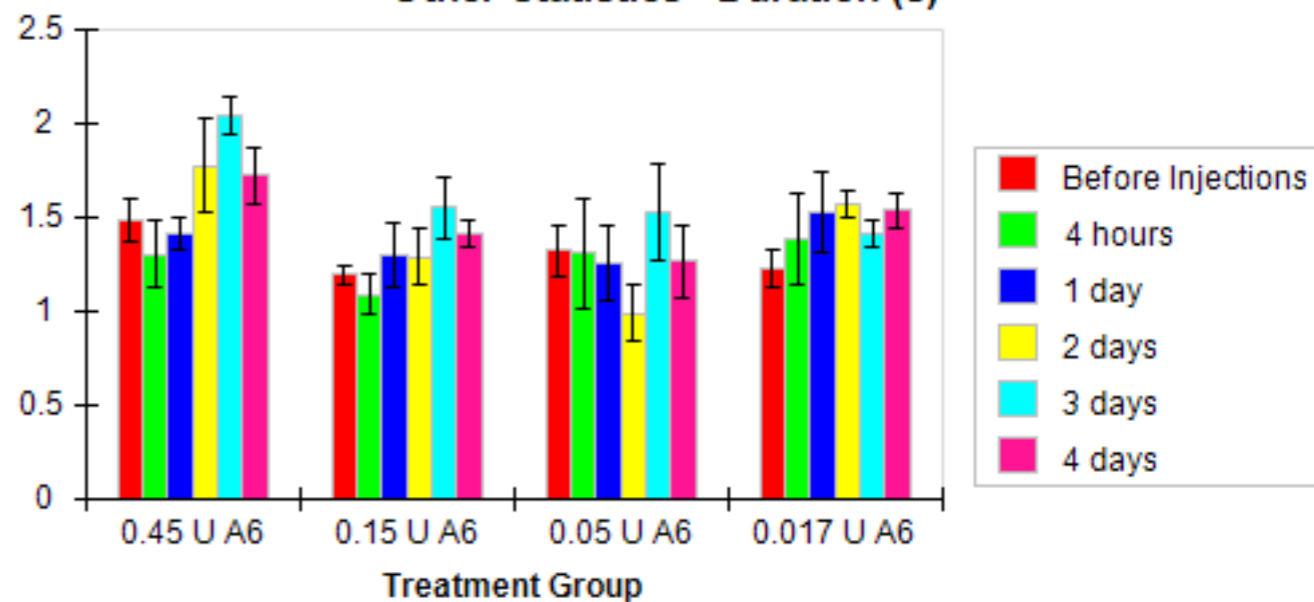

**Other Statistics - Average Speed (cm/s)**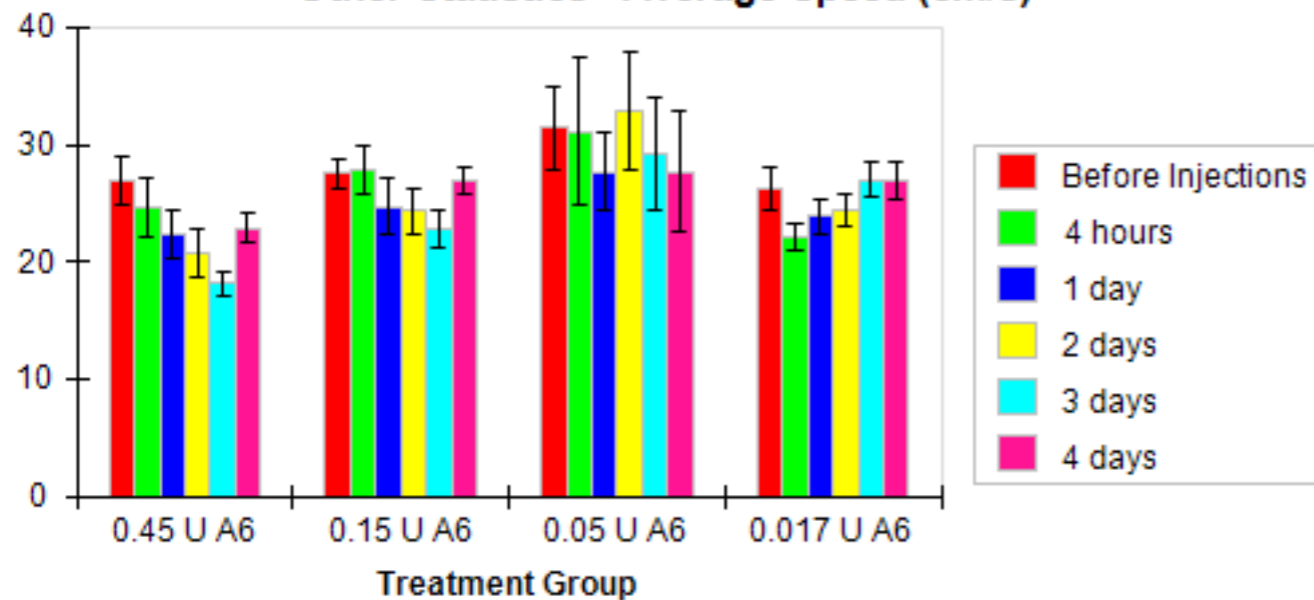**Other Statistics - Maximum Variation (%)**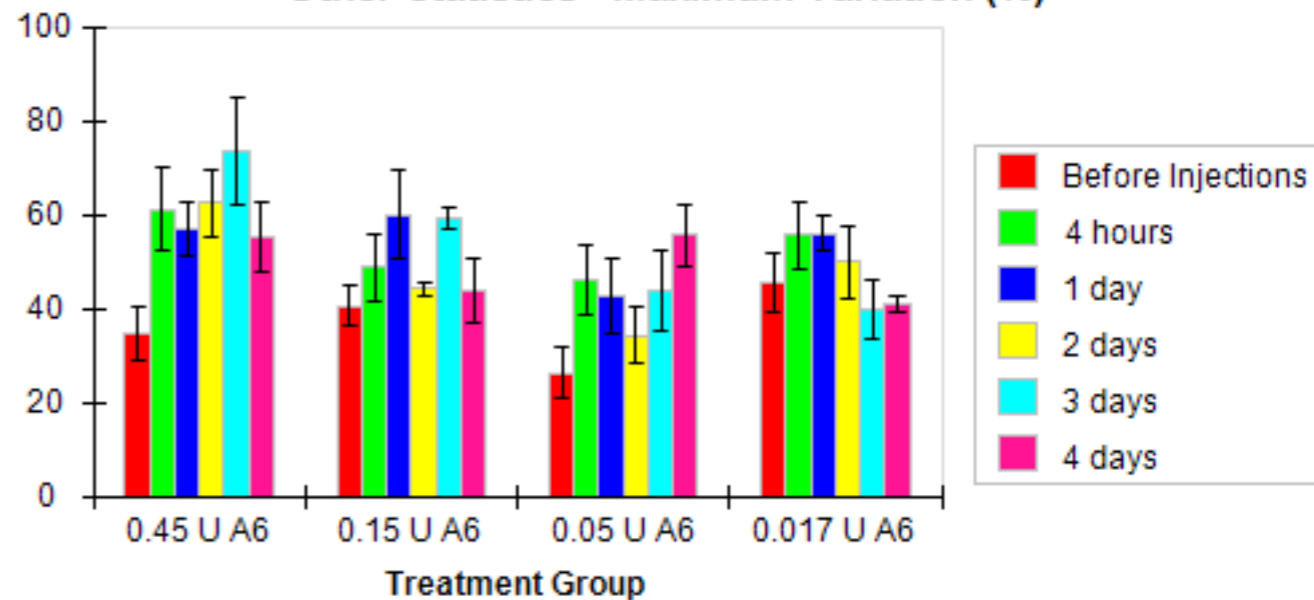**Other Statistics - Cadence (steps/second)**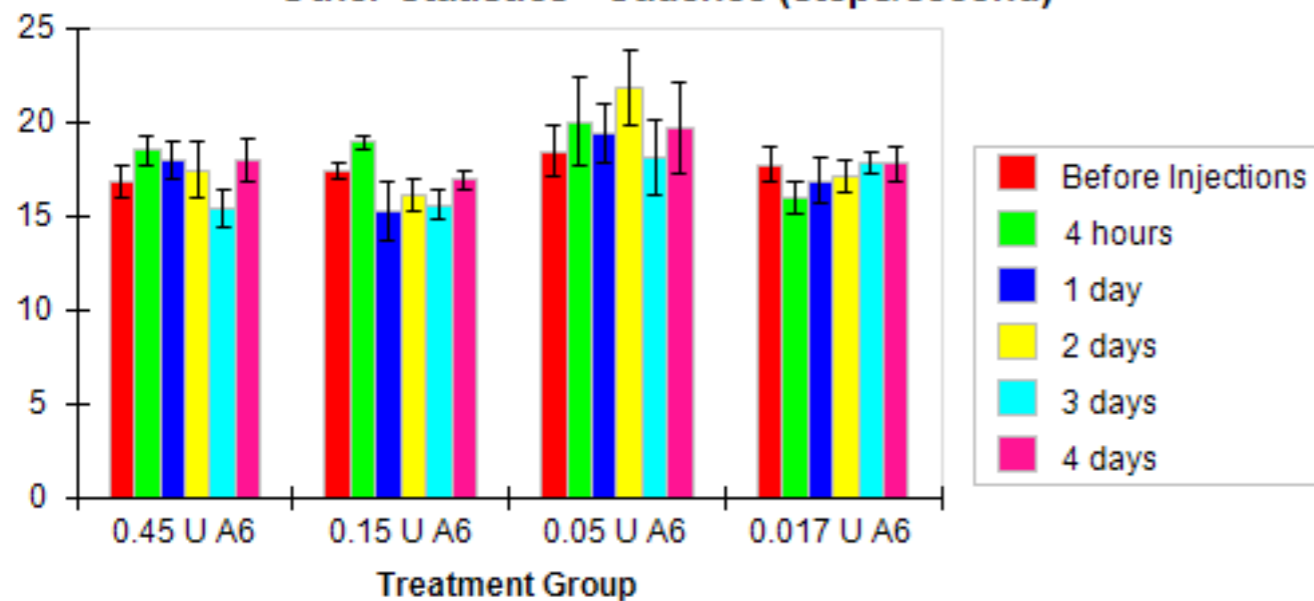**Other Statistics - Sciatic Functional Index**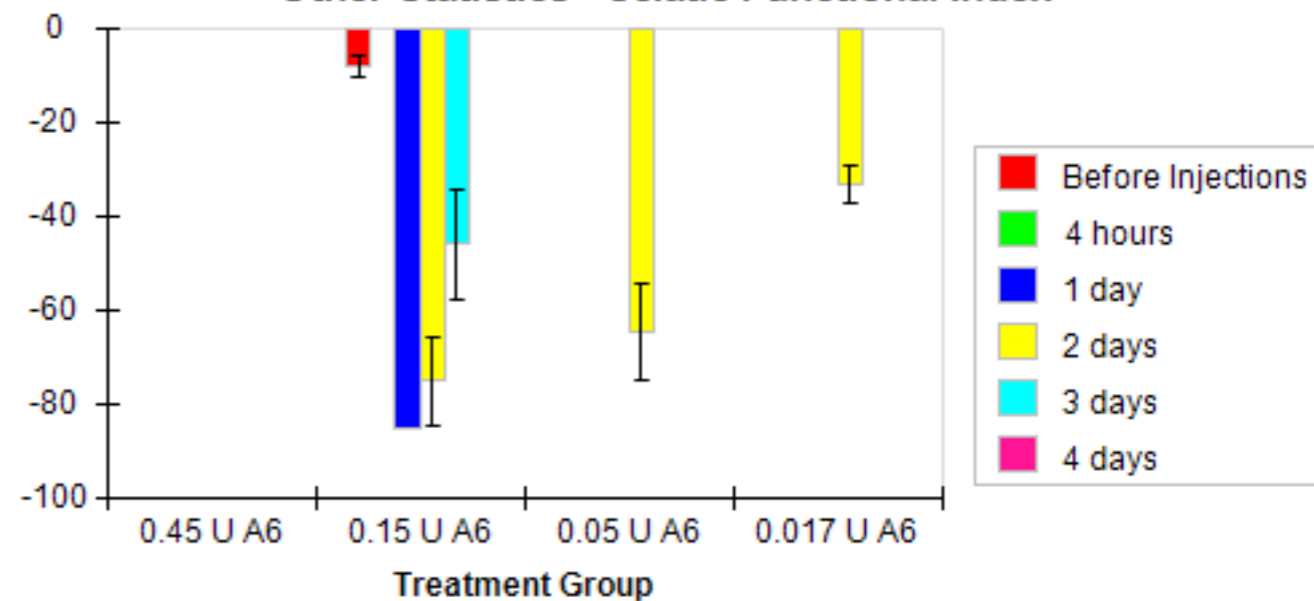

**Other Statistics - Peroneal Functional Index**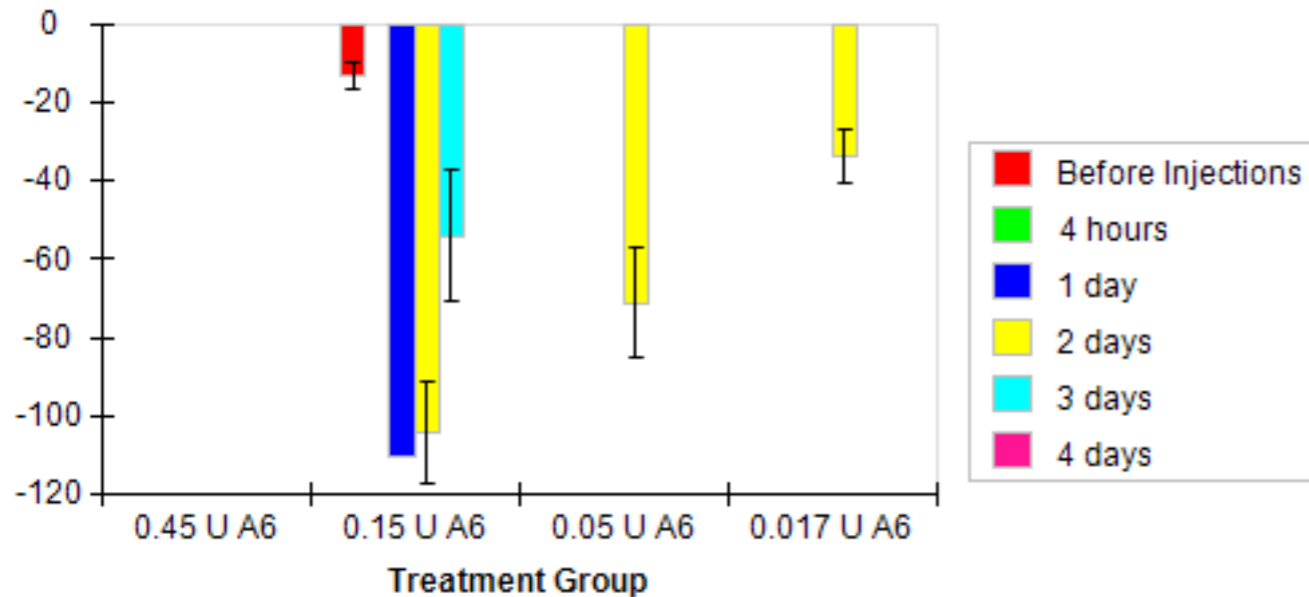**Other Statistics - Posterior Tibial Functional Index**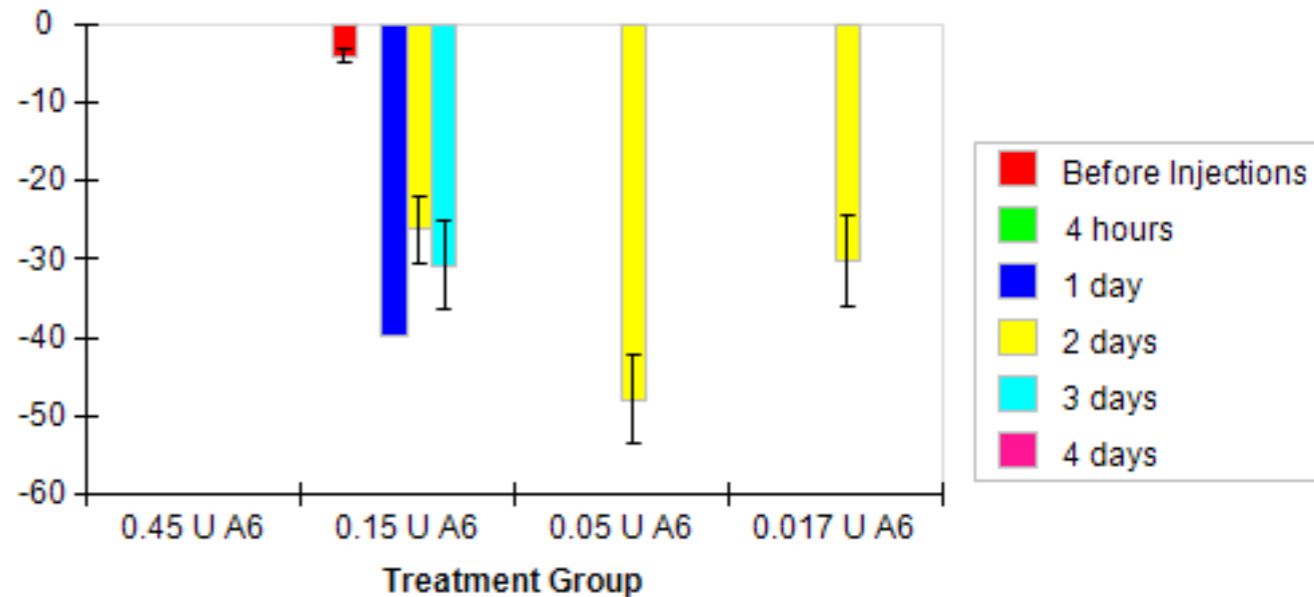**Print Positions - Right Paws (cm)**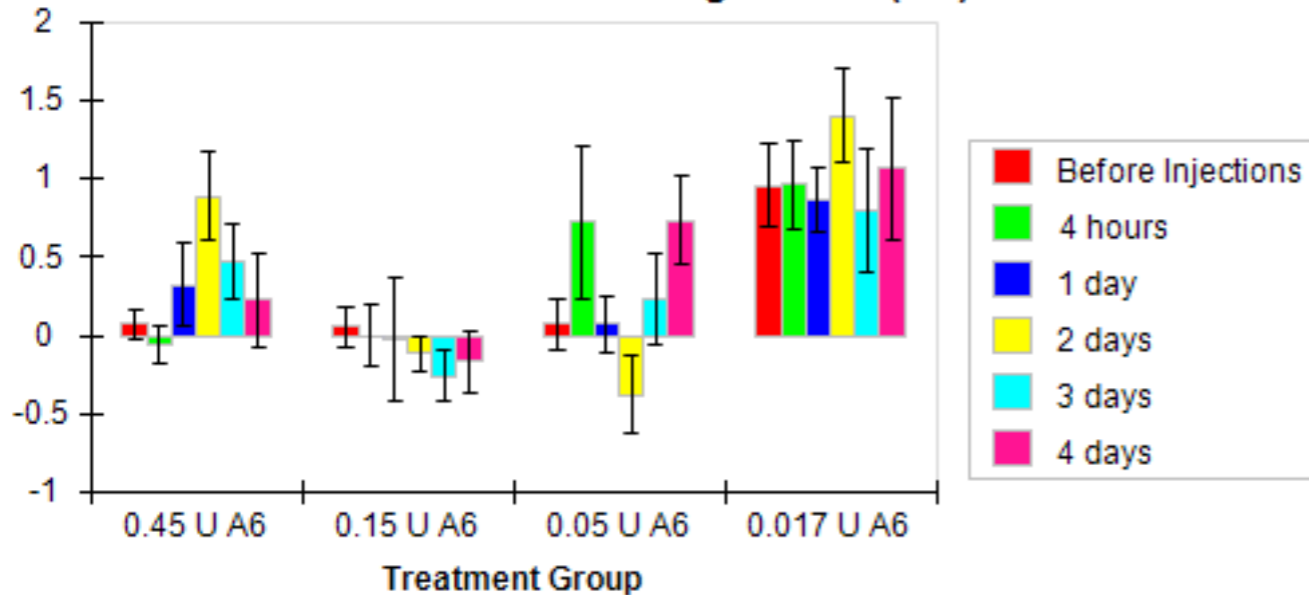**Print Positions - Left Paws (cm)**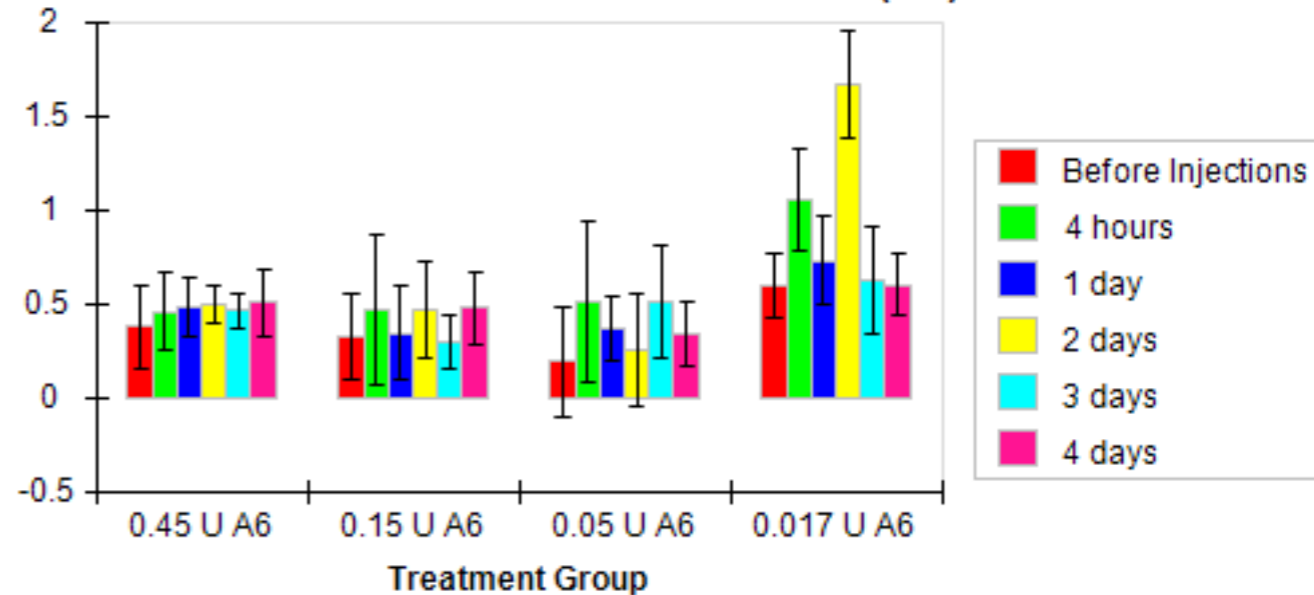



Phase Dispersions - RF->LH (Diagonal)

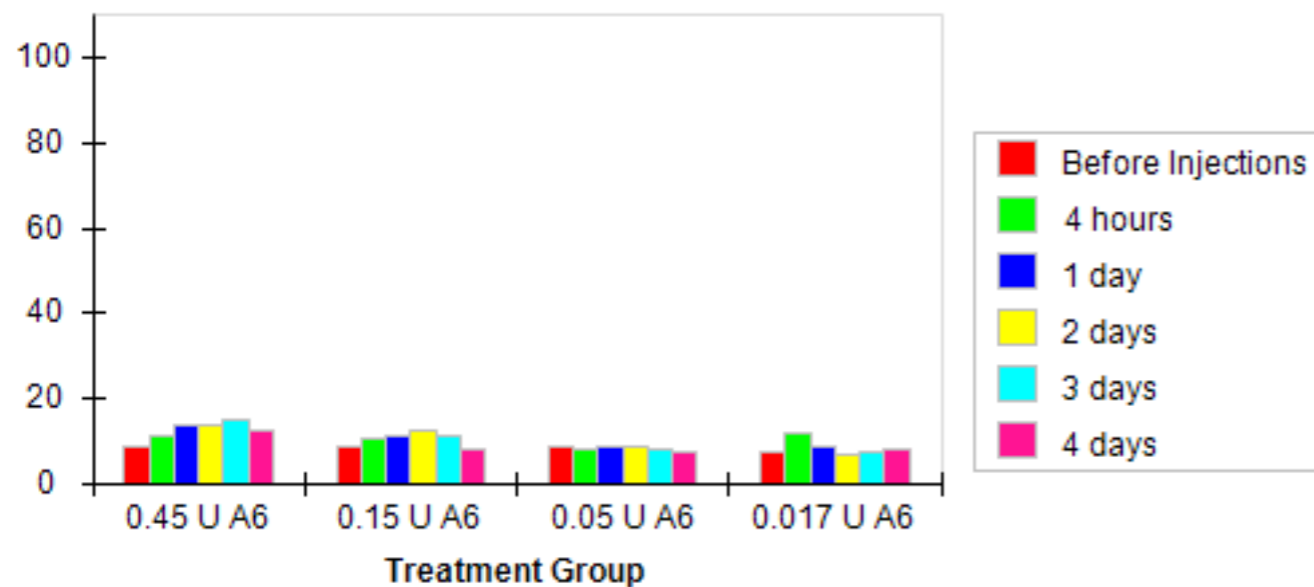

Phase Dispersions - LF->RH (Diagonal)

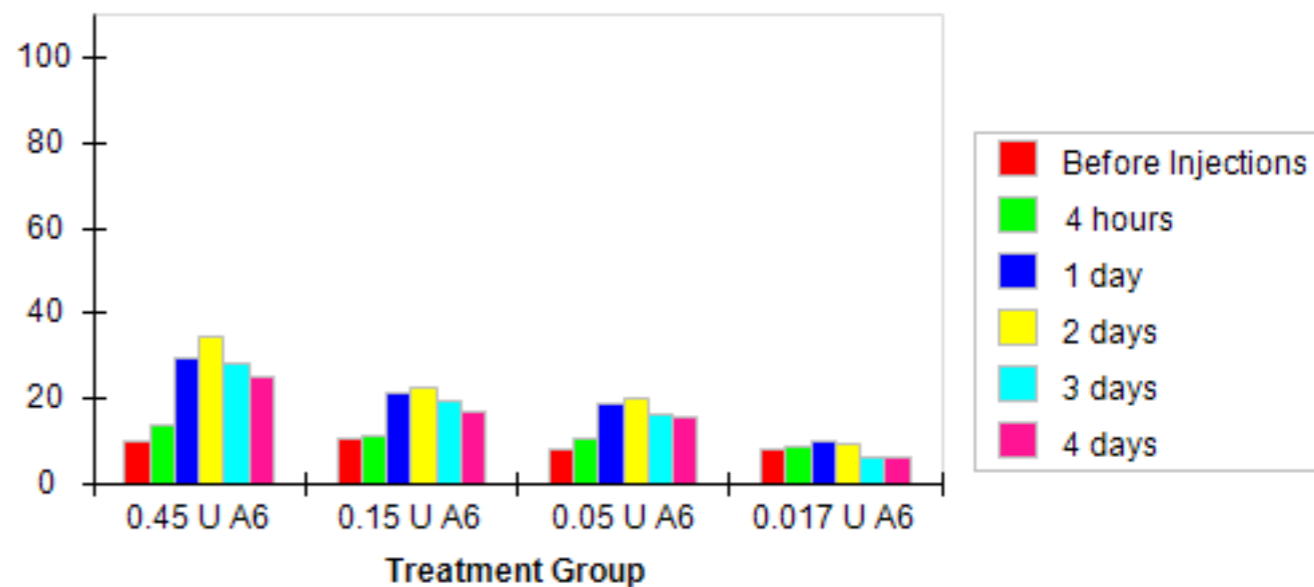

Phase Dispersions - LH->RH (Girdle)

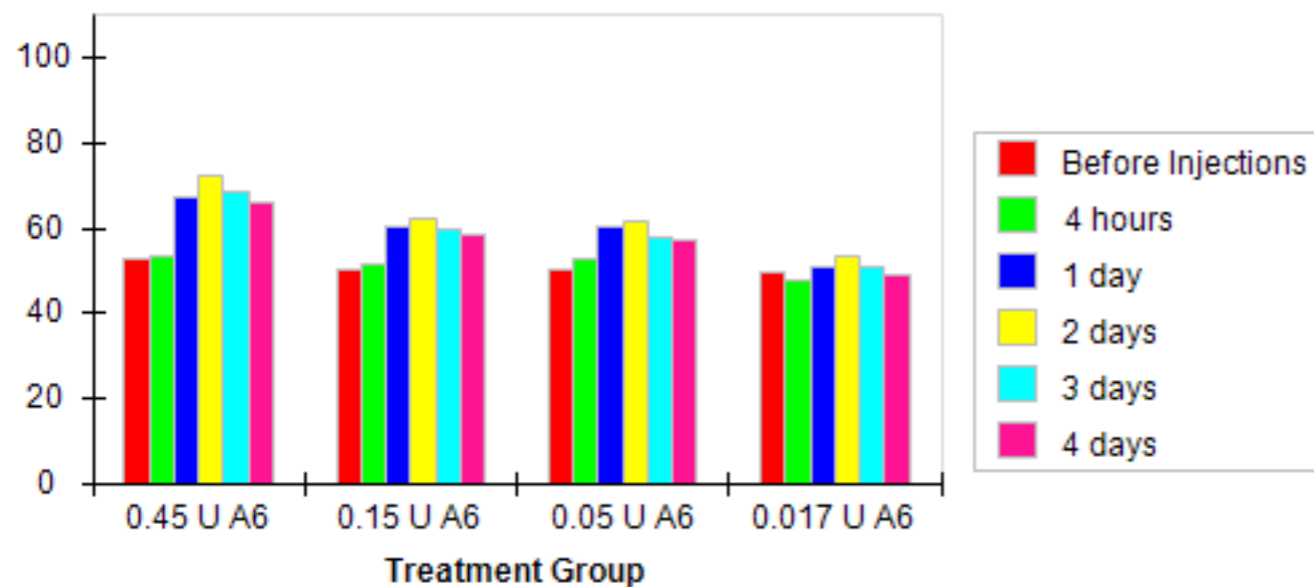

Phase Dispersions - LF->RF (Girdle)

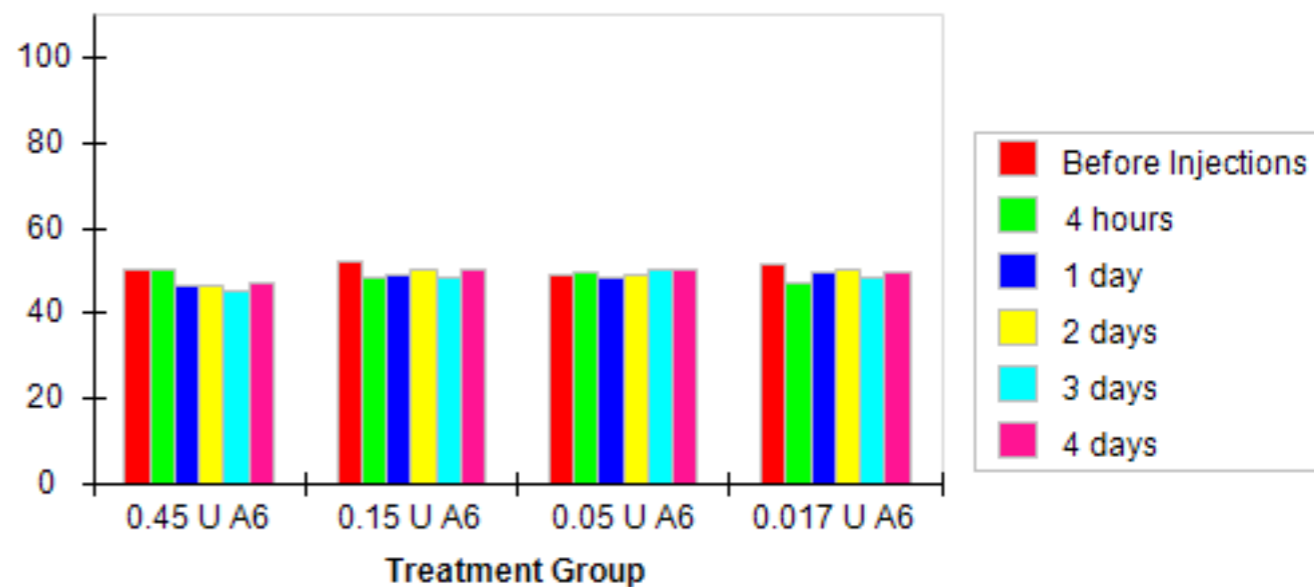

Phase Dispersions - RF->RH (Ipsilateral)

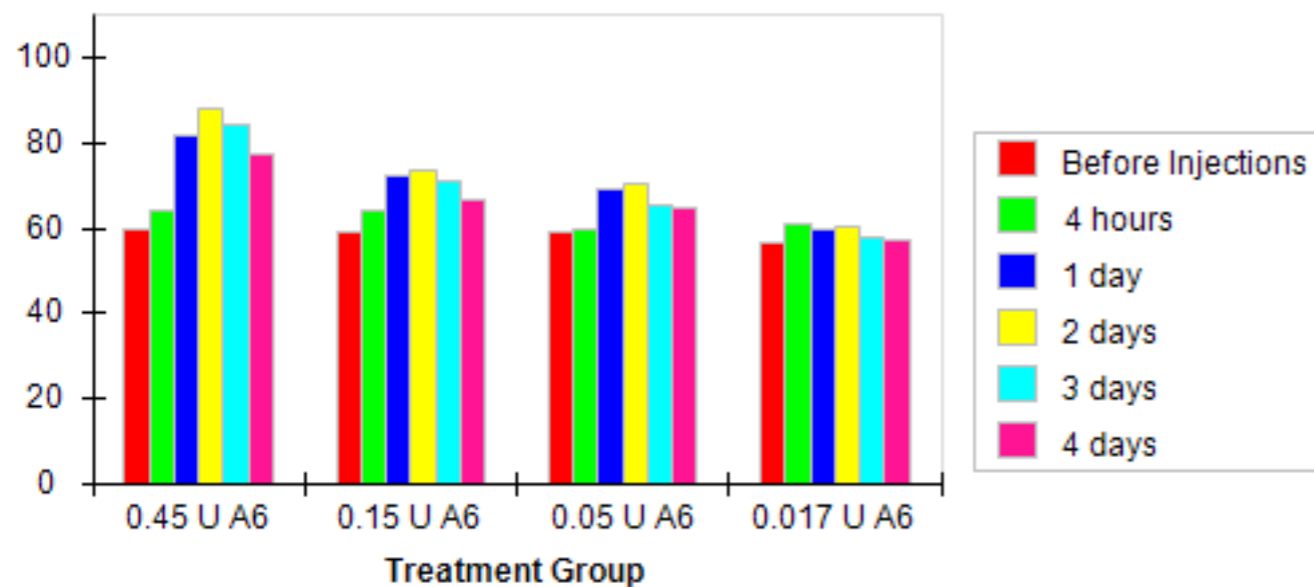

Phase Dispersions - LF->LH (Ipsilateral)

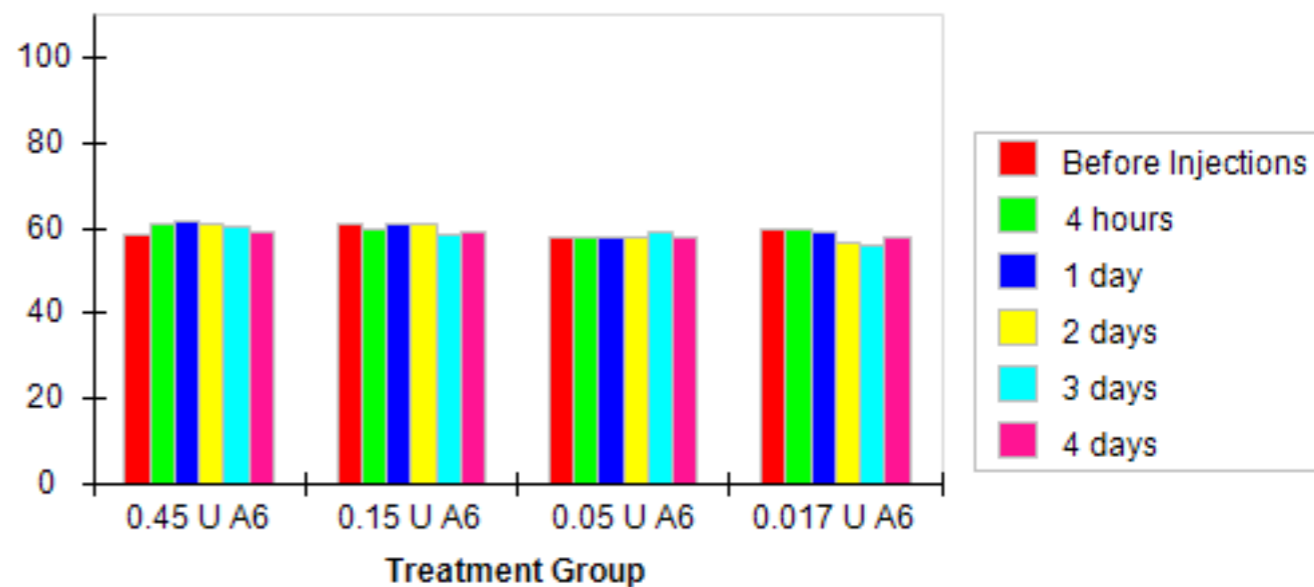

Couplings - RF->LH (Diagonal)

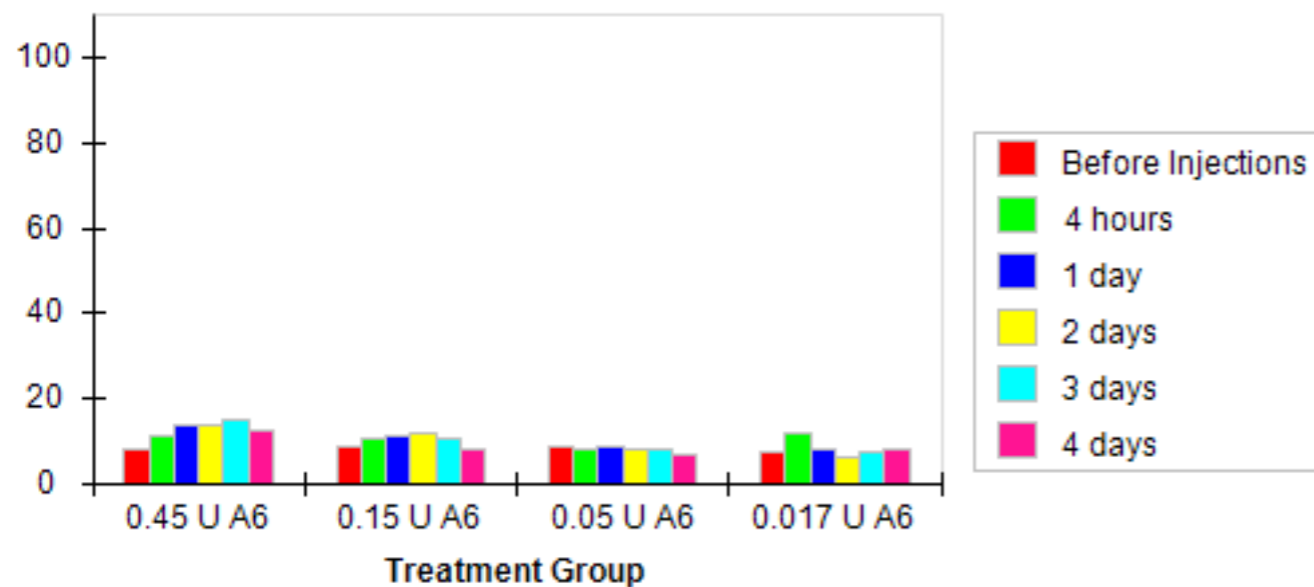

Couplings - LF->RH (Diagonal)

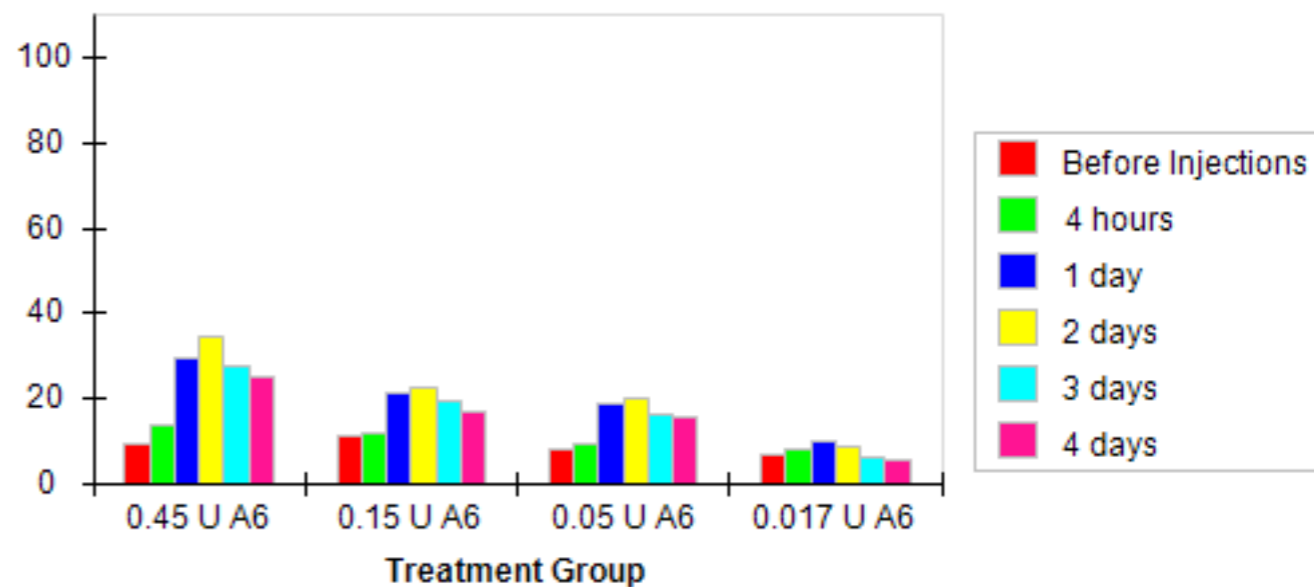

**Couplings - LH->RF (Diagonal)**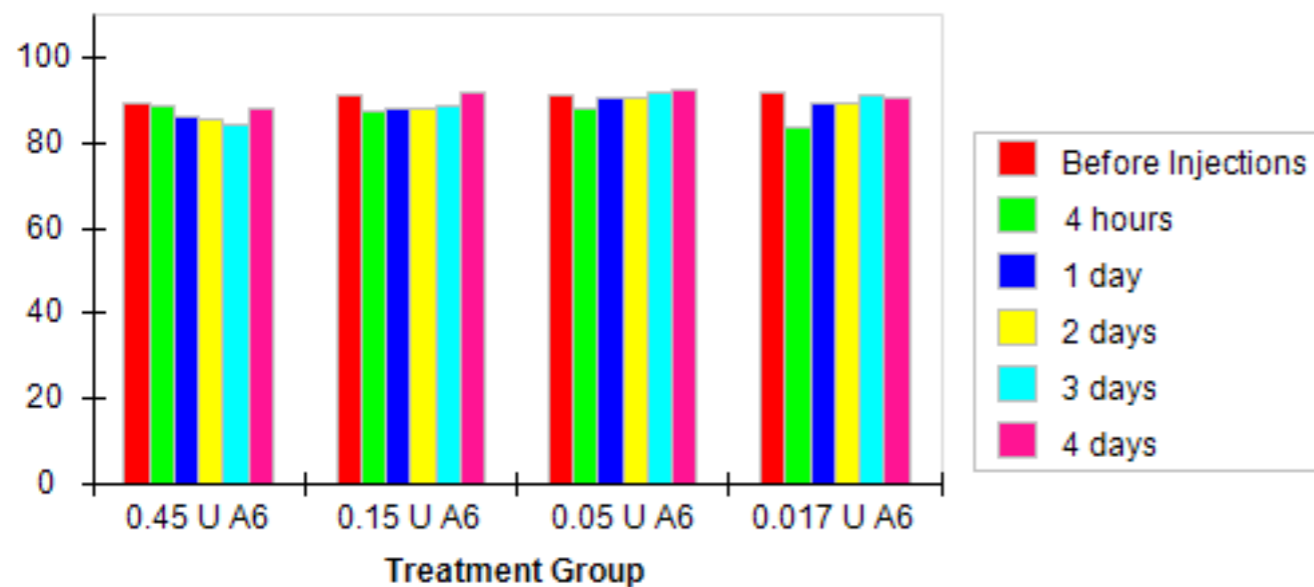**Couplings - RH->LF (Diagonal)**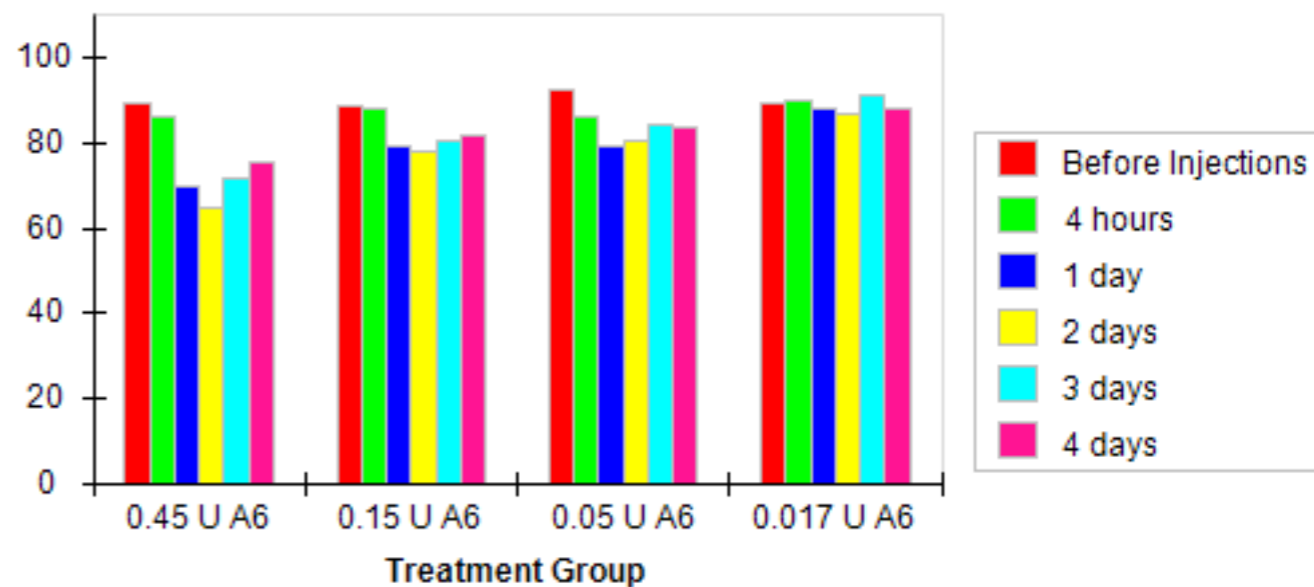**Couplings - LH->RH (Girdle)**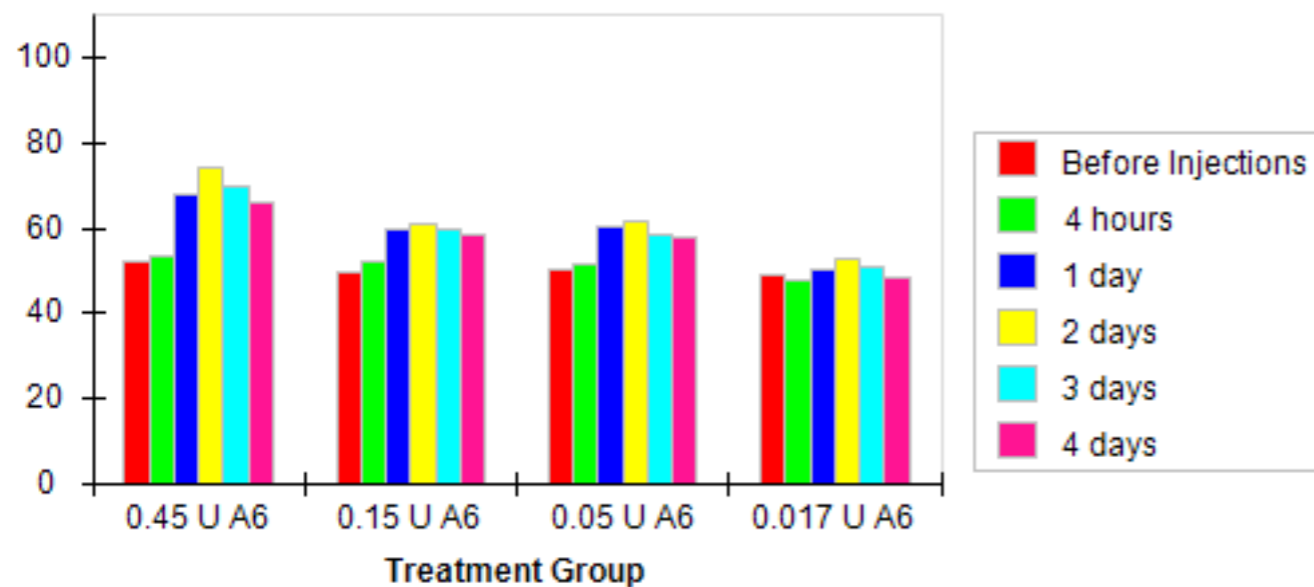**Couplings - LF->RF (Girdle)**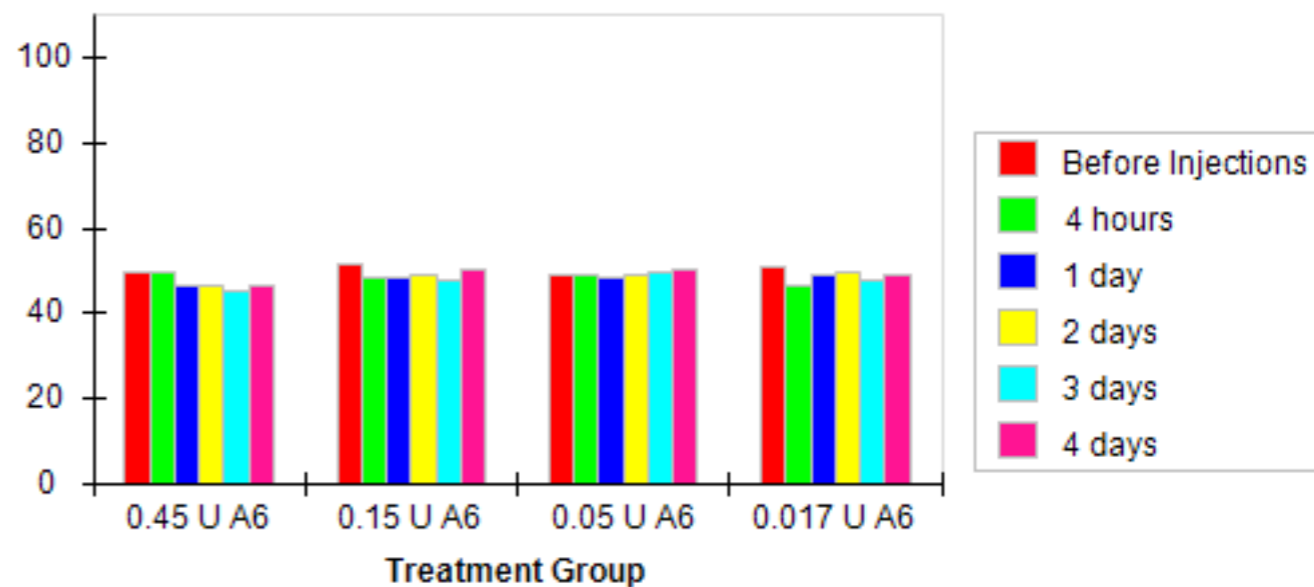

**Couplings - RH->LH (Girdle)**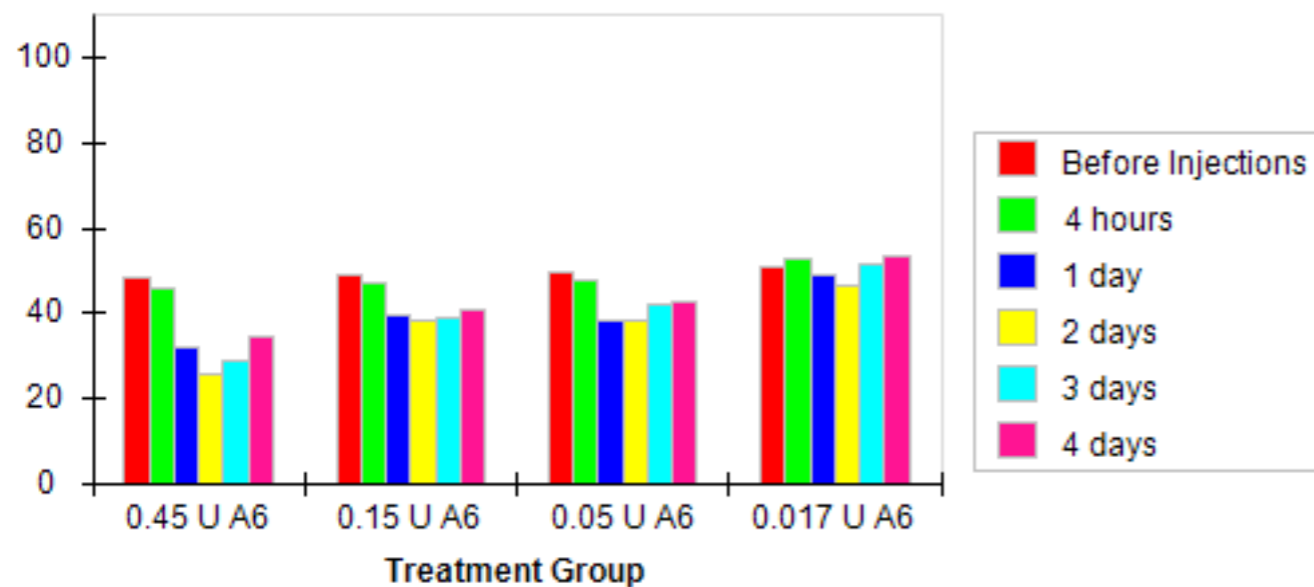**Couplings - RF->LF (Girdle)**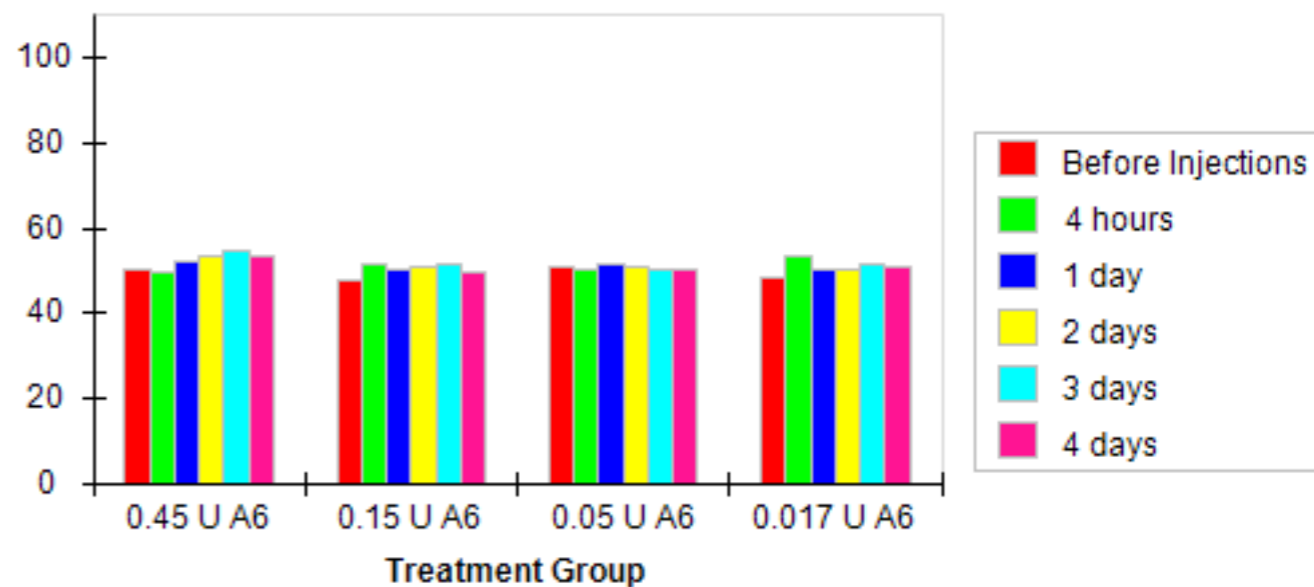**Couplings - RF->RH (Ipsilateral)**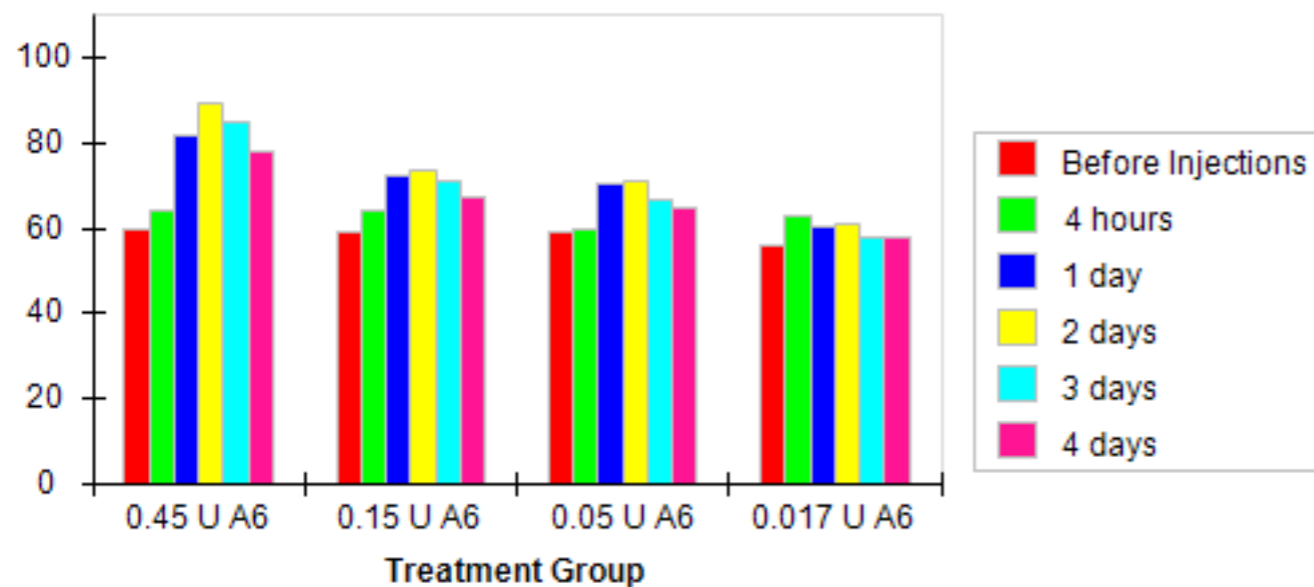**Couplings - LF->LH (Ipsilateral)**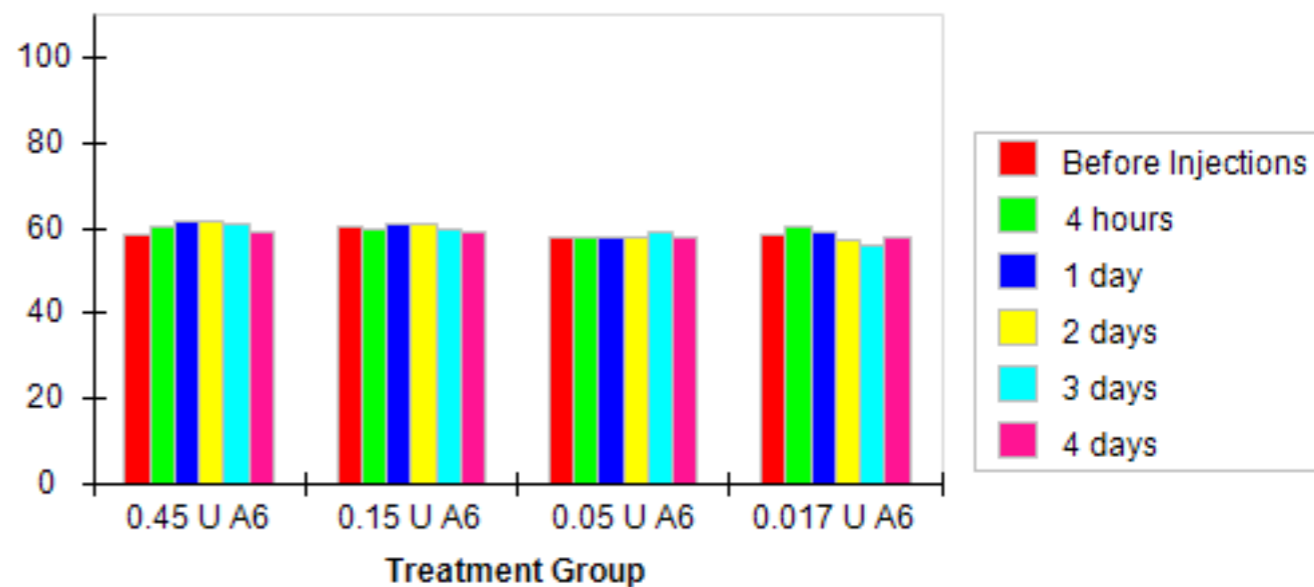

**Couplings - RH->RF (Ipsilateral)**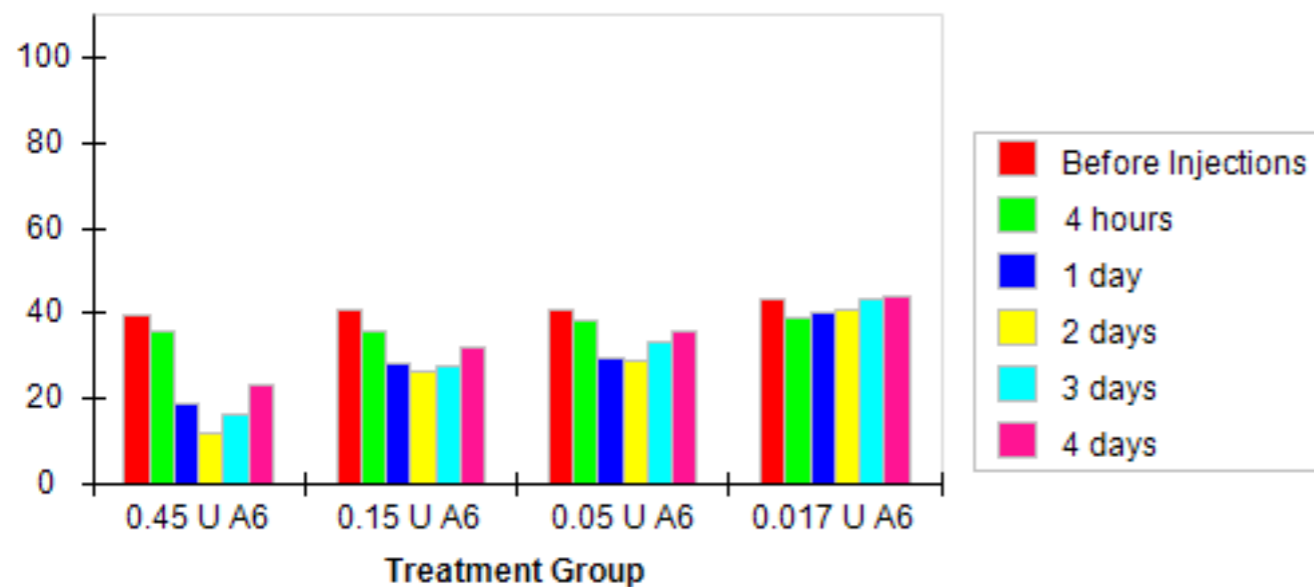**Couplings - LH->LF (Ipsilateral)**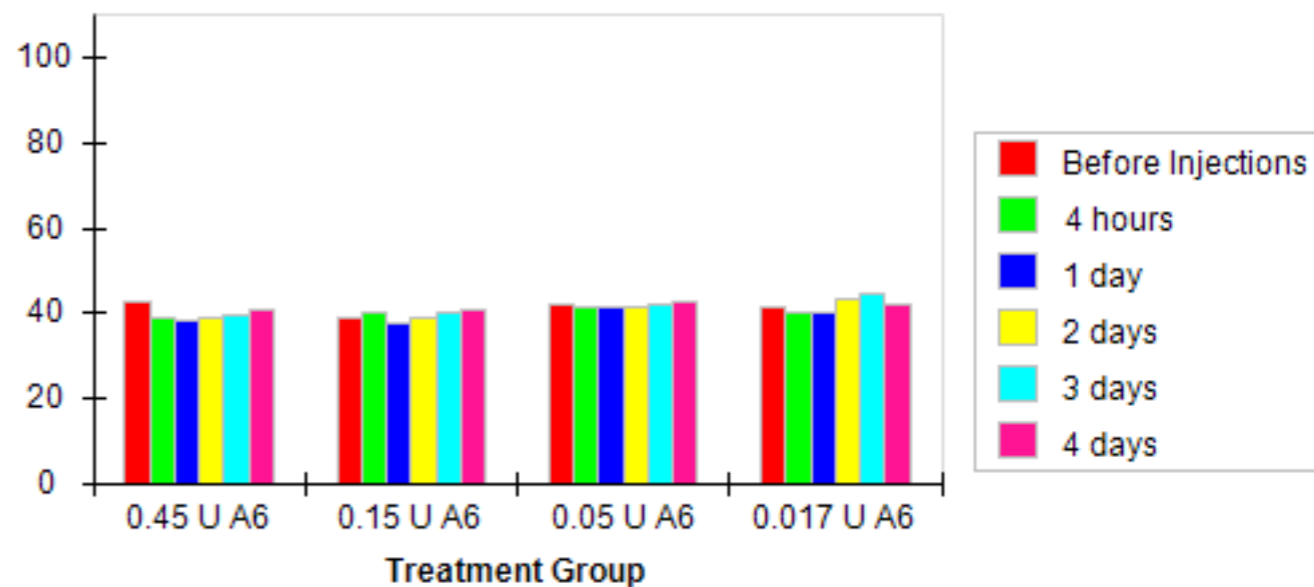**Support - Standing on Zero (%)**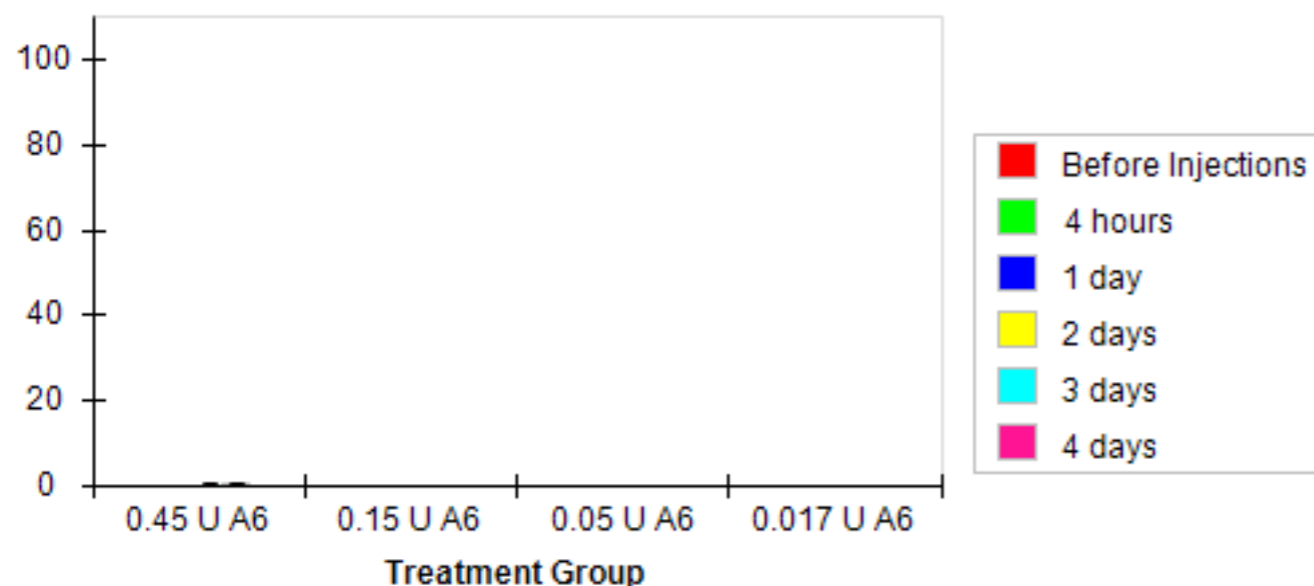**Support - Standing on Single (%)**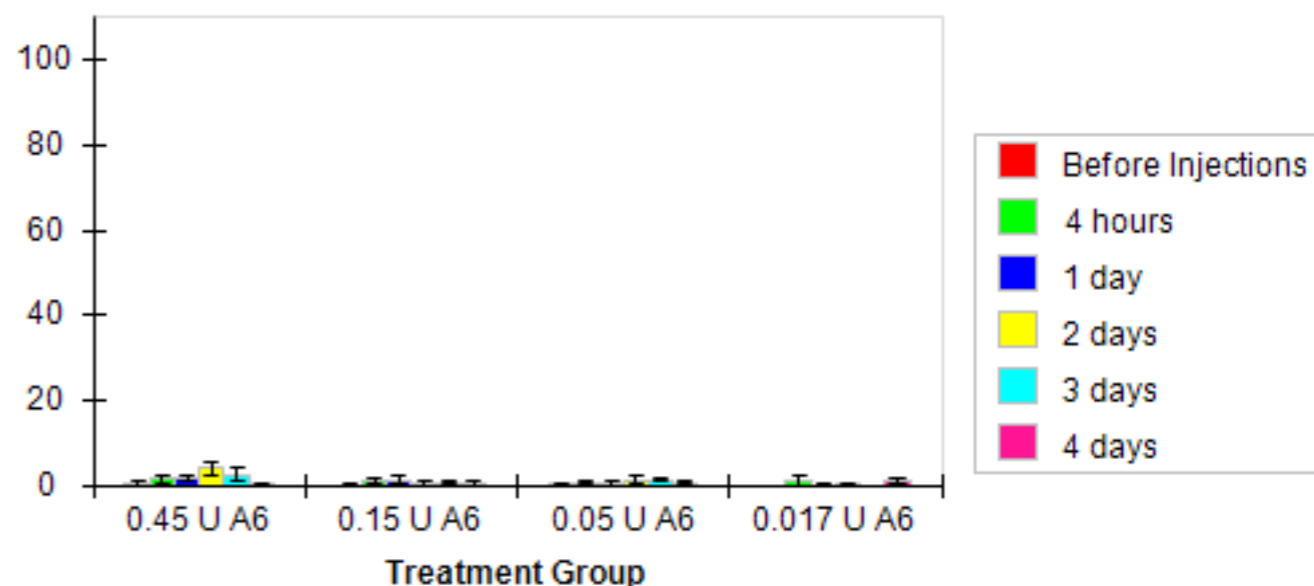

**Support - Standing on Diagonal (%)**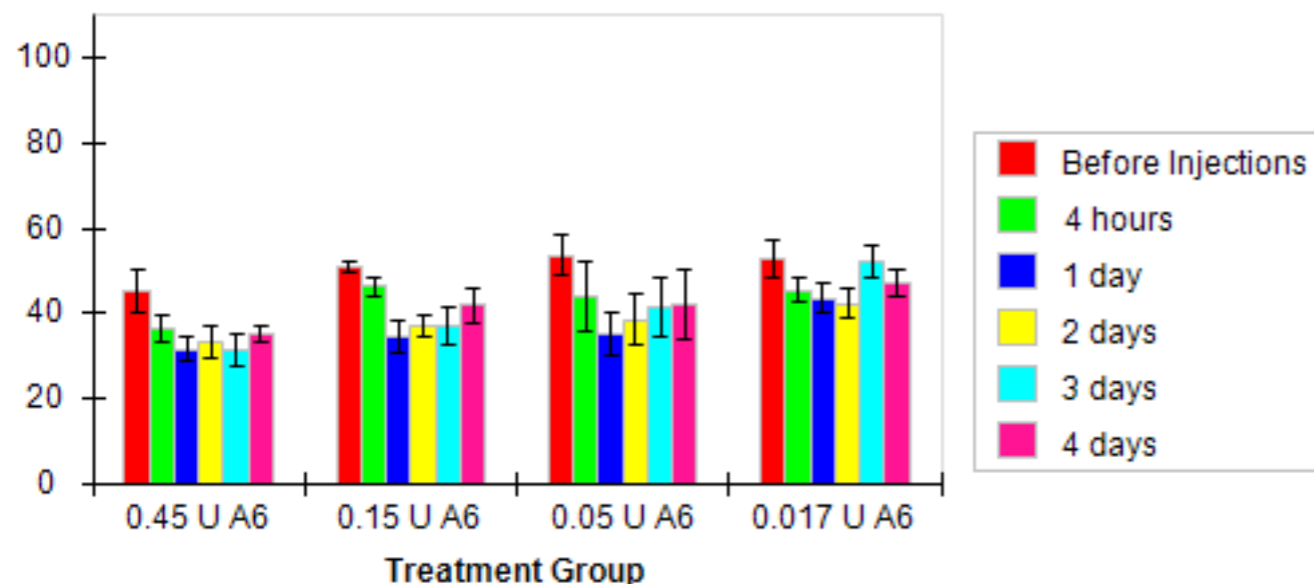**Support - Standing on Girdle (%)**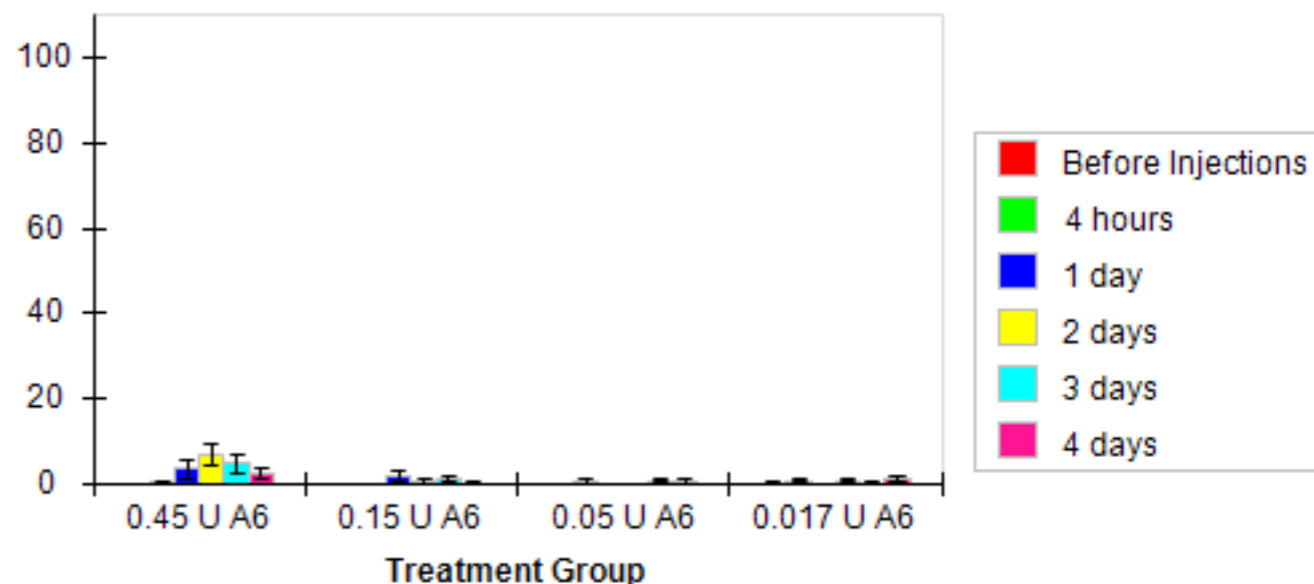**Support - Standing on Lateral (%)**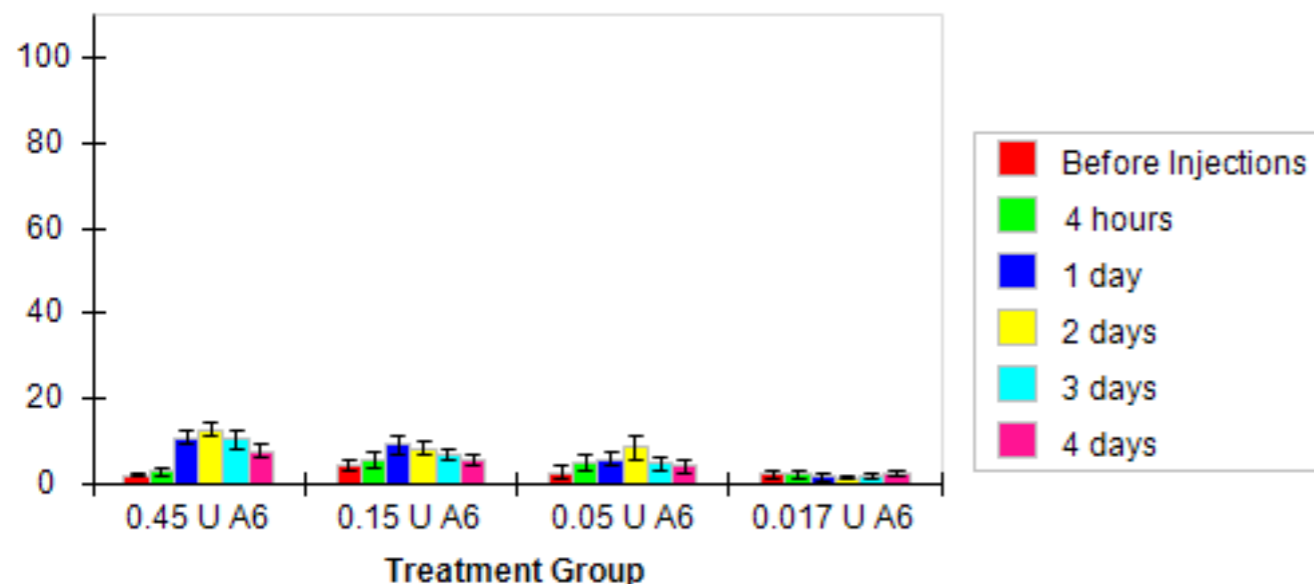**Support - Standing on Three (%)**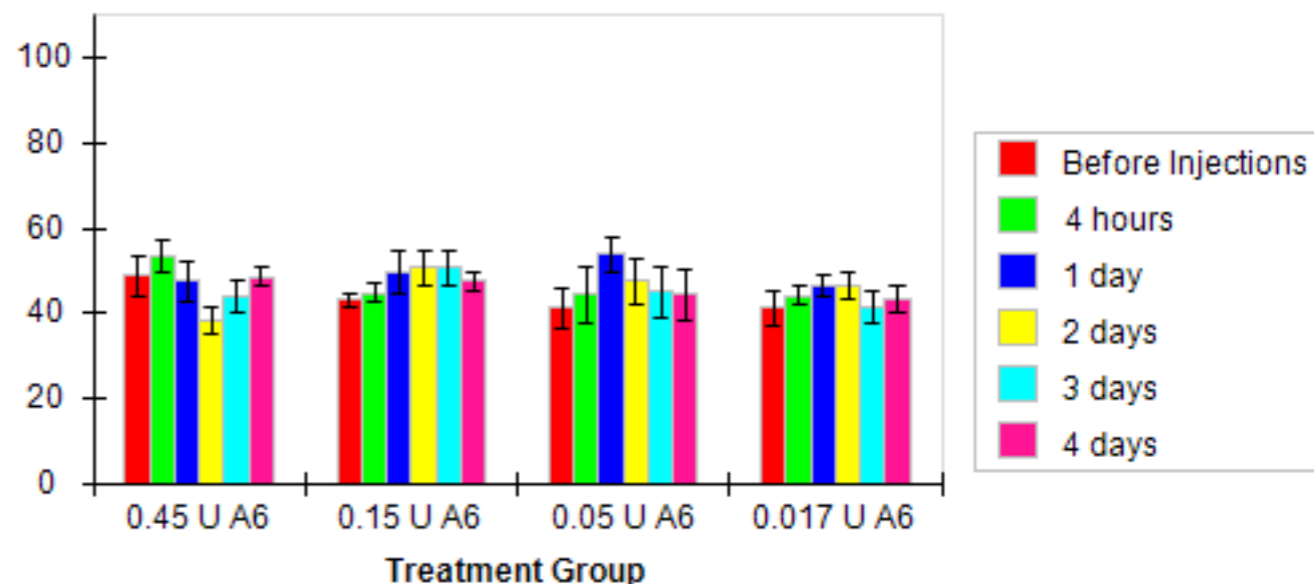

Support - Standing on Four (%)

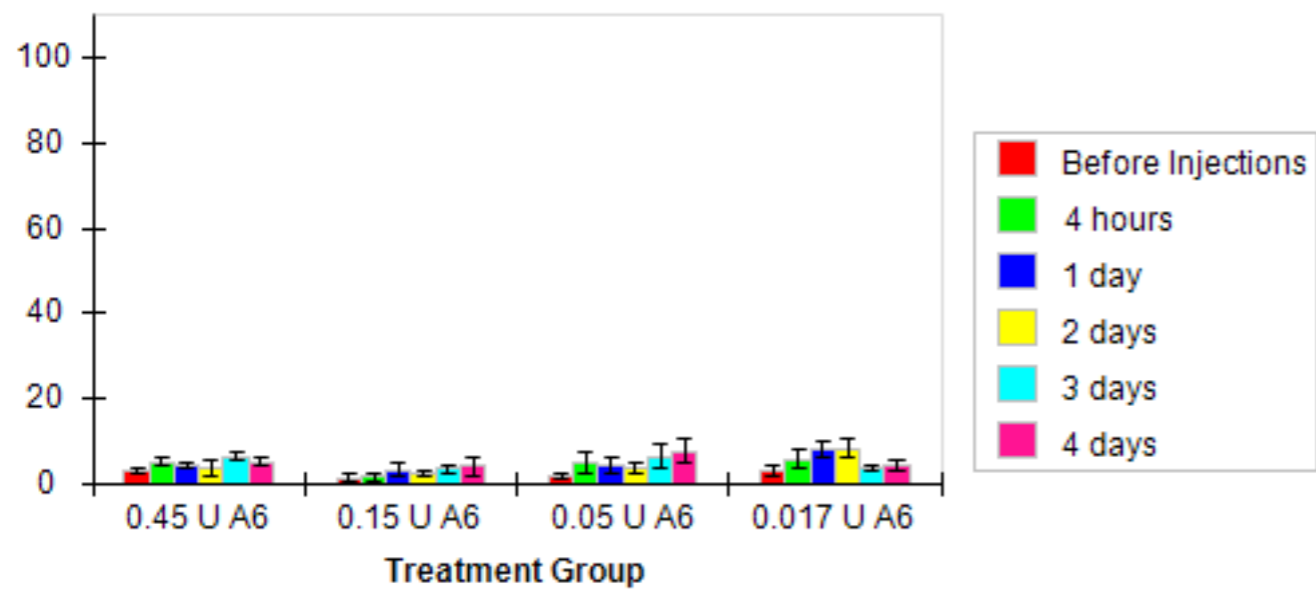

Supplement: NIHMS1531998-supplement-4.pdf [file NIHMS1531998-supplement-4.pdf]
